# Supplementary material
Source: publisher figshare collection journal article supplement (https://gsapubs.figshare.com/articles/dataset/_/25987999)
Supplement: Supplementary file 1 [file 1]

## Sheet: Table S1
Table S1. Mg-Zn-Mo isotopic compositions of Cenozoic ultrapotassic lavas from the western Kunlun area of NW Tibet.
Location	Sample	δ25Mg (‰)	2SD	δ26Mg (‰)	2SD	N	δ66Zn (‰)	2SD	δ68Zn (‰)	2SD	N	Mo (ppm)	δ98Mo (‰)	2SD	Reference
Kangxiwa	14QW100	-0.14	0.02	-0.27	0.07	4	0.29	0.02	0.59	0.02	3	2.51	-0.41	0.05	This study
Kangxiwa	14QW105	-0.14	0.03	-0.3	0.09	4	0.31	0.03	0.6	0.01	3	2.42	-0.4	0.05	This study
Kangxiwa	14QW118	-0.17	0.02	-0.25	0.04	4	0.28	0.02	0.56	0.05	3	1.85	-0.29	0.06	This study
Dahongliutan	14QW121	-0.19	0.02	-0.32	0.09	4	0.31	0.01	0.62	0.03	3	2.94	-0.08	0.06	This study
Dahongliutan	14QW122	-0.22	0.02	-0.35	0.06	4	0.33	0.01	0.68	0.04	3	1.31	-0.12	0.07	This study
Quanshuigou	14QW155	-0.24	0.04	-0.38	0.07	4	0.34	0.02	0.69	0.05	3	1.6	-0.44	0.07	This study
Quanshuigou	14QW163	-0.19	0.03	-0.39	0.06	4	0.36	0.05	0.68	0.04	3	4.08	-0.78	0.06	This study
Quanshuigou	14QW176	-0.18	0.02	-0.34	0.07	4	0.32	0.01	0.66	0.04	3	2.74	-0.05	0.07	This study
Keliya	14QW44	-0.14	0.05	-0.19	0.07	4	0.28	0.01	0.56	0.05	3	3.08	-0.12	0.05	This study
Keliya	14QW51	-0.16	0.05	-0.24	0.05	4	0.27	0.01	0.53	0.03	3	2.77	0	0.07	This study
Duplicate	14QW100	-0.13	0.02	-0.27	0.03	4									This study
Duplicate	14QW163						0.36	0.01	0.7	0.03	3				This study
Duplicate	14QW44											3.15	-0.13	0.06	This study
Standard	BCR-2	-0.09	0.05	-0.16	0.07	3									This study
Standard	BCR-2 (Ref)	-0.08	0.02	-0.17	0.03										Wang et al. (2017)
Standard	BHVO-2	-0.11	0.05	-0.19	0.08	4									This study
Standard	BHVO-2 (Ref)	-0.1	0.04	-0.2	0.07										Teng et al. (2007)
Standard	JA-2						0.29	0.04	0.57	0.09	3				This study
Standard	JA-2 (Ref)						0.28	0.03	0.57	0.05					Chen et al. (2016)
Standard	BHVO-2						0.3	0.02	0.62	0	3				This study
Standard	BHVO-2 (Ref)						0.31	0.03	0.62	0.06					Chen et al. (2016)
Standard	GBW07105											3	-0.56	0.07	This study
Standard	GBW07105 (Ref)											2.92	-0.51	0.04	Zhao et al. (2016)
Standard	AGV-2											1.98	-0.18	0.07	This study
Standard	AGV-2 (Ref)											1.96	-0.15	0.01	Willbold et al. (2016)
N: Number of repeat measurements of each sample; Ref-reference. The long-term external precision of δ26Mg and δ66Zn is better than 0.06 ‰ (2SD) and 0.05 ‰ (2SD), respectively, based on repeated analyses of reference materials and natural samples
Chen, S., Liu, Y., Hu, J., Zhang, Z., Hou, Z., Huang, F., and Yu, H., 2016, Zinc isotopic compositions of NIST SRM 683 and whole-rock reference materials: Geostandards and Geoanalytical Research, v. 40, p. 417–432, https://doi.org/10.1111/j.1751-908X.2015.00377.x.
Teng, F.-Z., Wadhwa, M., and Helz, R. T., 2007, Investigation of magnesium isotope fractionation during basalt differentiation: Implications for a chondritic composition of the terrestrial mantle: Earth and Planetary Science Letters, v. 261, p. 84-92, https://doi.org/10.1016/j.epsl.2007.06.004.
Wang, X.-J., Chen, L.-H., Hofmann, A. W., Mao, F.-G., Liu, J.-Q., Zhong, Y., Xie, L.-W., and Yang, Y.-H., 2017, Mantle transition zone-derived EM1 component beneath NE China: Geochemical evidence from Cenozoic potassic basalts: Earth and Planetary Science Letters, v. 465, p. 16-28, https://doi.org/10.1016/j.epsl.2017.02.028.
Willbold, M., Hibbert, K., Lai, Y. J., Freymuth, H., Hin, R. C., Coath, C., Vils, F., and Elliott, T., 2016, High-Precision Mass-Dependent Molybdenum Isotope Variations in Magmatic Rocks Determined by Double-Spike MC-ICP-MS: Geostandards and Geoanalytical Research, v. 40, p. 389–403, https://doi.org/10.1111/j.1751-908X.2015.00388.x.
Zhao, P.-P., Li, J., Zhang, L., Wang, Z.-B., Kong, D.-X., Ma, J.-L., Wei, G.-J., and Xu, J.-F., 2016, Molybdenum Mass Fractions and Isotopic Compositions of International Geological Reference Materials: Geostandards and Geoanalytical Research, v. 40, p. 217–226, https://doi.org/10.1111/j.1751-908X.2015.00373.x.

## Sheet: Table S2
Table S2. Mo isotopic compositions of NIST 3134.
Sample	δ98/95Mo (‰)	2SD
NIST 3134-1	-0.02	0.04
NIST 3134-2	-0.03	0.06
NIST 3134-3	0	0.1
NIST 3134-4	0.01	0.13
NIST 3134-5	-0.03	0.06
NIST 3134-6	0.04	0.05
NIST 3134-7	0.02	0.06
NIST 3134-8	0.04	0.08
NIST 3134-9	0.02	0.06
NIST 3134-10	-0.01	0.04
NIST 3134-11	-0.01	0.07
NIST 3134-12	-0.03	0.04
NIST 3134-13	-0.05	0.06
NIST 3134-14	0.03	0.05
NIST 3134-15	0	0.06
NIST 3134-16	0.01	0.05
NIST 3134-17	0	0.08
NIST 3134-18	-0.02	0.05
NIST 3134-19	-0.02	0.05
NIST 3134-20	0.04	0.07
NIST 3134-21	0.02	0.07
NIST 3134-22	0.01	0.06
NIST 3134-23	0	0.06
NIST 3134-24	0.03	0.05
NIST 3134-25	-0.01	0.05
NIST 3134-26	0.01	0.04
NIST 3134-27	-0.01	0.06
NIST 3134-28	-0.05	0.05
NIST 3134-29	0.03	0.06
Mean	0	0.05

## Sheet: Table S3
Table S3. Results of Laser Raman analysis of calcite inclusion and CO2 bubble in clinopyroxene from Kangxiwa mantle xenoliths.
Calcite inclusion in clinopyroxene			CO2 bubble in clinopyroxene
Raman Shift (cm-1)	Raman Intensity (cps)		Raman Shift (cm-1)	Raman Intensity (cps)
47.7027	-1.62512		47.7027	-4.28156
49.1956	-1.98157		49.1956	-5.453
50.6881	-2.01355		50.6881	-7.67535
52.1805	-2.20996		52.1805	-11.3705
53.6725	-3.22498		53.6725	-16.6635
55.1643	-5.24658		55.1643	-23.2684
56.6559	-8.04132		56.6559	-30.0121
58.1472	-11.8848		58.1472	-38.3949
59.6382	-14.5563		59.6382	-41.9048
61.1289	-15.0577		61.1289	-28.6376
62.6194	-13.9519		62.6194	4.04346
64.1097	-11.8762		64.1097	41.8637
65.5997	-8.29449		65.5997	81.8647
67.0894	-2.42548		67.0894	121.186
68.5789	5.22595		68.5789	153.636
70.0681	12.6094		70.0681	174.611
71.557	17.4039		71.557	184.872
73.0457	18.631		73.0457	185.618
74.5341	16.9207		74.5341	176.424
76.0223	13.6695		76.0223	159.742
77.5102	10.2993		77.5102	141.444
78.9978	8.9007		78.9978	125.875
80.4852	5.98596		80.4852	112.641
81.9724	3.08179		81.9724	99.3358
83.4592	1.23846		83.4592	86.225
84.9459	0.234192		84.9459	74.8234
86.4322	-1.11292		86.4322	64.3336
87.9183	-2.55029		87.9183	54.0679
89.4041	-3.28894		89.4041	45.1196
90.8897	-3.02161		90.8897	37.6447
92.375	-1.80273		92.375	31.1273
93.8601	-0.307068		93.8601	26.0674
95.3449	0.736877		95.3449	22.527
96.8295	1.66046		96.8295	19.2406
98.3138	2.53967		98.3138	14.9735
99.7978	3.11536		99.7978	9.80377
101.282	3.92188		101.282	5.05939
102.765	3.53247		102.765	1.77155
104.248	-0.611755		104.248	-0.247314
105.731	-5.84735		105.731	-1.513
107.214	-7.16345		107.214	-2.1817
108.697	-4.6911		108.697	-2.20673
110.179	-1.94232		110.179	-1.33807
111.661	-0.644226		111.661	0.22113
113.142	0.145447		113.142	0.99762
114.624	1.62189		114.624	0.19928
116.105	3.06671		116.105	-0.376709
117.586	2.47504		117.586	0.675842
119.067	1.60046		119.067	1.90363
120.547	3.59613		120.547	1.8222
122.027	7.46783		122.027	1.61908
123.507	9.71796		123.507	2.98157
124.987	9.90112		124.987	5.87842
126.466	10.9185		126.466	10.169
127.945	14.4539		127.945	16.275
129.424	19.4424		129.424	23.2435
130.903	25.0849		130.903	29.8398
132.381	32.1768		132.381	37.4235
133.86	40.842		133.86	47.5569
135.337	49.6262		135.337	58.5682
136.815	57.8256		136.815	68.0043
138.292	67.0956		138.292	75.1619
139.769	79.0139		139.769	79.9475
141.246	92.033		141.246	82.5641
142.723	104.528		142.723	83.7773
144.199	118.466		144.199	83.2278
145.675	135.442		145.675	78.5406
147.151	154.907		147.151	68.3253
148.627	178.472		148.627	55.019
150.102	207.48		150.102	42.9659
151.577	237.539		151.577	34.7597
153.052	262.245		153.052	29.2597
154.526	278.267		154.526	22.7943
156.001	283.325		156.001	14.004
157.475	274.528		157.475	5.99829
158.948	251.252		158.948	2.05865
160.422	218.151		160.422	1.84137
161.895	183.711		161.895	2.54968
163.368	153.088		163.368	1.80878
164.841	125.14		164.841	-0.318726
166.314	99.384		166.314	-1.91815
167.786	79.2101		167.786	-2.48315
169.258	65.509		169.258	-3.20251
170.73	54.3274		170.73	-3.31934
172.201	42.8684		172.201	-2.1001
173.672	32.429		173.672	-0.701843
175.143	25.2903		175.143	0.343628
176.614	22.2649		176.614	1.87952
178.084	22.1965		178.084	4.35852
179.555	22.6164		179.555	8.0459
181.025	21.8684		181.025	12.7851
182.494	20.64		182.494	16.6696
183.964	20.2438		183.964	17.6366
185.433	19.5859		185.433	15.9829
186.902	16.6979		186.902	13.3332
188.371	12.7047		188.371	10.8905
189.839	10.6689		189.839	9.40466
191.307	10.95		191.307	9.06305
192.775	11.3606		192.775	10.1937
194.243	12.2289		194.243	13.7183
195.71	15.8206		195.71	18.3713
197.178	19.9954		197.178	19.6369
198.645	19.1128		198.645	14.8276
200.111	11.9229		200.111	6.86505
201.578	3.01965		201.578	0.983704
203.044	-3.73718		203.044	-0.316467
204.51	-7.19122		204.51	1.46442
205.975	-5.45135		205.975	3.29517
207.441	1.02948		207.441	3.37885
208.906	6.54871		208.906	2.10602
210.371	7.20056		210.371	1.58606
211.836	4.43872		211.836	3.00647
213.3	0.103394		213.3	4.71106
214.764	-3.40503		214.764	4.90289
216.228	-4.63171		216.228	4.45697
217.692	-5.76685		217.692	5.29517
219.155	-7.5072		219.155	7.51129
220.618	-6.88098		220.618	9.77728
222.081	-2.44952		222.081	12.0775
223.544	1.89185		223.544	15.4588
225.006	2.875		225.006	19.2651
226.468	2.53363		226.468	21.4963
227.93	3.40503		227.93	21.4338
229.392	4.57812		229.392	20.3121
230.853	4.73389		230.853	19.5374
232.314	2.67908		232.314	18.5943
233.775	-0.876221		233.775	16.139
235.236	-2.61298		235.236	12.6405
236.696	-0.228394		236.696	9.38007
238.157	1.77405		238.157	6.49854
239.616	-0.968323		239.616	3.90228
241.076	-4.01312		241.076	2.32587
242.535	-3.73145		242.535	2.62604
243.995	-1.34509		243.995	4.08533
245.453	1.43286		245.453	4.51801
246.912	5.76105		246.912	3.22125
248.371	12.2411		248.371	1.69537
249.829	20.4887		249.829	0.83136
251.287	30.5685		251.287	-0.167236
252.744	41.1509		252.744	-1.89362
254.202	49.9987		254.202	-3.12848
255.659	58.1412		255.659	-2.21478
257.116	68.9988		257.116	0.301453
258.572	82.1171		258.572	2.73389
260.029	92.8076		260.029	4.63092
261.485	100.194		261.485	5.55688
262.941	110.73		262.941	4.57703
264.396	130.961		264.396	2.52325
265.852	160.136		265.852	1.40137
267.307	191.662		267.307	1.72107
268.762	220.46		268.762	2.62628
270.217	248.826		270.217	2.74359
271.671	284.307		271.671	1.28125
273.125	330.31		273.125	-1.27643
274.579	382.021		274.579	-2.6839
276.033	433.893		276.033	-2.01923
277.486	484.035		277.486	-1.16107
278.939	527.776		278.939	-2.29449
280.392	556.334		280.392	-4.60095
281.845	565.053		281.845	-5.09497
283.297	554.824		283.297	-3.29449
284.749	526.801		284.749	-1.96277
286.201	483.47		286.201	-2.67786
287.653	431.019		287.653	-3.9964
289.104	375.493		289.104	-4.01685
290.556	320.425		290.556	-2.28125
292.007	269.673		292.007	0.411072
293.457	227.972		293.457	2.56128
294.908	196.337		294.908	2.8642
296.358	171.284		296.358	1.14301
297.808	150.001		297.808	-1.71997
299.258	130.518		299.258	-1.1795
300.707	109.977		300.707	2.32819
302.156	89.4247		302.156	7.90735
303.605	74.2977		303.605	13.1345
305.054	67.4091		305.054	16.6627
306.502	66.5557		306.502	20.2164
307.951	67.3001		307.951	25.5557
309.399	66.2673		309.399	31.5047
310.846	63.7543		310.846	37.1702
312.294	61.6673		312.294	43.6284
313.741	59.8815		313.741	50.4715
315.188	58.4595		315.188	56.7766
316.635	60.3856		316.635	64.7302
318.081	67.8477		318.081	76.9409
319.528	78.252		319.528	92.0176
320.974	86.958		320.974	105.679
322.419	92.9973		322.419	114.939
323.865	98.8073		323.865	121.001
325.31	104.373		325.31	127.74
326.755	106.913		326.755	136.109
328.2	105.865		328.2	142.639
329.644	102.355		329.644	144.438
331.089	96.2889		331.089	141.804
332.533	87.6832		332.533	135.83
333.977	77.3194		333.977	127.266
335.42	66.1357		335.42	118.159
336.863	55.8827		336.863	111.54
338.307	47.9363		338.307	108.142
339.749	42.4537		339.749	105.905
341.192	39.3424		341.192	103.311
342.634	36.3228		342.634	100.048
344.076	29.2717		344.076	95.3516
345.518	18.5825		345.518	88.7046
346.96	9.99304		346.96	80.8575
348.401	6.75854		348.401	74.1072
349.842	5.48059		349.842	71.8754
351.283	1.67236		351.283	75.1934
352.724	-3.42175		352.724	80.4362
354.164	-5.06445		354.164	83.4007
355.604	-1.86902		355.604	83.5242
357.044	2.0144		357.044	82.0882
358.484	3.31372		358.484	79.2175
359.923	2.21637		359.923	74.6778
361.362	-0.576904		361.362	69.8754
362.801	-3.18628		362.801	67.1072
364.24	-3.40625		364.24	66.4982
365.678	-1.42065		365.678	65.7671
367.117	0.503601		367.117	64.1797
368.555	0.628601		368.555	63.1422
369.992	-0.826904		369.992	62.639
371.43	-2.35455		371.43	61.9047
372.867	-2.44537		372.867	61.8455
374.304	-1.60931		374.304	62.9927
375.741	-0.62738		375.741	63.4714
377.177	0.203796		377.177	60.9849
378.613	1.15009		378.613	56.1895
380.049	3.50861		380.049	52.6478
381.485	7.92029		381.485	53.0475
382.921	13.1043		382.921	57.3887
384.356	18.9985		384.356	64.5311
385.791	28.2285		385.791	73.6466
387.226	42.2947		387.226	84.8918
388.66	59.4167		388.66	98.8919
390.095	76.5485		390.095	114.022
391.529	90.894		391.529	125.846
392.963	100.705		392.963	131.628
394.396	106.591		394.396	133.011
395.83	109.493		395.83	132.73
397.263	106.913		397.263	130.456
398.696	95.1833		398.696	122.706
400.128	75.1207		400.128	107.451
401.561	51.9521		401.561	87.5828
402.993	30.519		402.993	67.915
404.425	12.9404		404.425	50.8258
405.856	-0.514771		405.856	36.272
407.288	-9.86615		407.288	23.9939
408.719	-12.762		408.719	14.1417
410.15	-9.03247		410.15	6.35944
411.581	-6.32092		411.581	-0.0857544
413.011	-5.6983		413.011	-4.89185
414.441	-5.85455		414.441	-6.70074
415.871	-4.90143		415.871	-4.24158
417.301	-3.35339		417.301	-1.30048
418.73	-3.12738		418.73	0.350952
420.16	-4.23676		420.16	-0.503601
421.589	-5.14661		421.589	-2.42786
423.017	-5.27887		423.017	-3.33893
424.446	-4.44714		424.446	-3.07214
425.874	-2.10339		425.874	-2.83893
427.302	0.764404		427.302	-3.20673
428.73	2.06372		428.73	-3.18268
430.158	1.62183		430.158	-1.81848
431.585	0.78186		431.585	0.251221
433.012	0.669495		433.012	1.95795
434.439	1.72308		434.439	2.91467
435.866	2.97491		435.866	2.77045
437.292	2.70734		437.292	1.33777
438.718	0.797058		438.718	-0.295654
440.144	-1.5509		440.144	-0.71637
441.57	-3.31824		441.57	-0.258423
442.995	-3.36084		442.995	-0.655029
444.42	-0.939087		444.42	-2.72717
445.845	2.56085		445.845	-4.95795
447.27	4.14233		447.27	-4.94849
448.695	2.47473		448.695	-2.15332
450.119	-0.0279541		450.119	0.677307
451.543	-0.321533		451.543	1.1214
452.967	0.65155		452.967	0.350586
454.39	0.697998		454.39	1.8017
455.813	0.227173		455.813	5.24963
457.236	0.138245		457.236	6.35754
458.659	-0.405029		458.659	3.62531
460.082	-1.85217		460.082	0.0997314
461.504	-2.84784		461.504	-1.92249
462.926	-2.3324		462.926	-2.83203
464.348	-0.704041		464.348	-2.89453
465.77	0.636719		465.77	-1.29767
467.191	1.21918		467.191	1.44293
468.612	1.875		468.612	3.3429
470.033	2.61902		470.033	3.79266
471.454	2.7464		471.454	3.54236
472.874	2.24878		472.874	2.6543
474.294	0.923096		474.294	1.01923
475.714	-0.967651		475.714	-0.269226
477.134	-2.41748		477.134	-0.0704346
478.554	-3.2569		478.554	0.850037
479.973	-4.03473		479.973	0.773315
481.392	-3.36328		481.392	-0.566101
482.811	0.556519		482.811	-1.82452
484.229	4.9892		484.229	-1.89062
485.648	5.45673		485.648	-1.08557
487.066	2.0517		487.066	-0.288208
488.483	-1.59857		488.483	0.250732
489.901	-3.39355		489.901	0.530518
491.318	-3.08282		491.318	0.613281
492.736	-1.19897		492.736	1.02979
494.152	0.116516		494.152	2.21716
495.569	-0.371643		495.569	4.17511
496.986	-0.523438		496.986	5.91901
498.402	1.83228		498.402	5.44855
499.818	5.53894		499.818	2.81042
501.233	8.42413		501.233	2.09821
502.649	10.1906		502.649	7.07739
504.064	11.4319		504.064	15.9509
505.479	12.71		505.479	23.7499
506.894	14.8843		506.894	28.2556
508.308	18.1107		508.308	30.4208
509.723	21.4672		509.723	31.2614
511.137	23.5004		511.137	31.2457
512.551	22.5696		512.551	31.0613
513.964	19.1747		513.964	31.4582
515.378	17.0186		515.378	32.9206
516.791	18.6794		516.791	34.8079
518.204	21.9226		518.204	34.9482
519.616	22.8263		519.616	31.7008
521.029	20.9684		521.029	26.097
522.441	18.7709		522.441	21.2773
523.853	17.5462		523.853	19.6167
525.265	17.5599		525.265	20.6152
526.676	19.4056		526.676	22.4448
528.087	22.2239		528.087	23.6835
529.498	23.6243		529.498	23.1907
530.909	22.4349		530.909	21.5758
532.32	18.7962		532.32	21.0576
533.73	13.5208		533.73	21.6829
535.14	8.81183		535.14	21.4831
536.55	6.7005		536.55	20.0363
537.96	6.95245		537.96	18.3738
539.369	7.64594		539.369	17.7457
540.778	7.26532		540.778	19.3239
542.187	6.40442		542.187	22.124
543.596	6.79761		543.596	22.9587
545.004	8.71069		545.004	20.8906
546.412	10.4249		546.412	18.7791
547.82	9.73718		547.82	18.2805
549.228	6.17902		549.228	17.2388
550.636	2.75043		550.636	14.3417
552.043	3.34222		552.043	11.4642
553.45	7.43884		553.45	9.87213
554.857	10.5718		554.857	9.08136
556.263	10.5694		556.263	9.54529
557.67	9.65057		557.67	12.1704
559.076	9.50311		559.076	15.832
560.482	8.64288		560.482	18.4836
561.887	6.25769		561.887	19.2195
563.293	4.00415		563.293	17.6962
564.698	3.21094		564.698	14.3519
566.103	4.00336		566.103	11.0625
567.508	5.57788		567.508	9.20374
568.912	5.73792		568.912	8.66742
570.317	2.85999		570.317	8.5957
571.721	-2.0083		571.721	7.6936
573.124	-6.16278		573.124	5.8075
574.528	-7.0553		574.528	4.12866
575.931	-4.30829		575.931	2.47552
577.335	-0.644836		577.335	-0.0641479
578.737	0.820923		578.737	-2.31512
580.14	0.0151978		580.14	-3.0885
581.543	-0.608032		581.543	-3.35736
582.945	1.54633		582.945	-2.83533
584.347	6.32355		584.347	0.100952
585.748	9.35059		585.748	3.88464
587.15	7.55194		587.15	5.3606
588.551	4.0719		588.551	4.74158
589.952	2.32178		589.952	3.50122
591.353	0.762573		591.353	1.44232
592.754	-2.15497		592.754	-1.23315
594.154	-4.45227		594.154	-3.01202
595.554	-4.37622		595.554	-3.19592
596.954	-2.39423		596.954	-2.49762
598.354	-0.349731		598.354	-1.58295
599.753	0.944702		599.753	-0.713928
601.152	0.444702		601.152	-0.516357
602.551	-1.55408		602.551	-1.97717
603.95	-3.25964		603.95	-3.25122
605.349	-3.42365		605.349	-2.61658
606.747	-2.42157		606.747	-0.782959
608.145	0.0162964		608.145	0.0360718
609.543	3.26202		609.543	-0.348572
610.94	5.36804		610.94	-0.509644
612.338	5.07129		612.338	0.638672
613.735	3.03577		613.735	1.70221
615.132	0.584351		615.132	0.960632
616.528	-0.989563		616.528	-0.464355
617.925	-0.78241		617.925	0.323792
619.321	0.657043		619.321	3.53802
620.717	1.85834		620.717	6.15894
622.113	1.85095		622.113	6.0119
623.508	0.360596		623.508	3.67322
624.904	-2.15863		624.904	0.891357
626.299	-3.75031		626.299	-0.944214
627.694	-3.90613		627.694	-1.3031
629.088	-2.94171		629.088	-0.0610962
630.483	-0.710632		630.483	2.9375
631.877	3.08636		631.877	7.27026
633.271	6.87891		633.271	11.343
634.664	8.36505		634.664	13.0773
636.058	7.35364		636.058	12.629
637.451	5.01392		637.451	13.3572
638.844	2.34393		638.844	16.9648
640.237	1.01404		640.237	20.8111
641.63	2.94482		641.63	23.2552
643.022	7.80713		643.022	26.3281
644.414	12.694		644.414	31.7953
645.806	15.1984		645.806	39.5319
647.198	16.1948		647.198	47.85
648.589	18.6983		648.589	54.5778
649.98	23.9897		649.98	60.9339
651.371	30.6156		651.371	70.2464
652.762	38.2318		652.762	83.0933
654.152	48.7288		654.152	99.0995
655.543	61.6843		655.543	119.234
656.933	74.8014		656.933	143.293
658.323	89.986		658.323	169.918
659.712	111.285		659.712	199.53
661.102	136.948		661.102	232.754
662.491	160.647		662.491	265.622
663.88	179.475		663.88	291.946
665.269	194.964		665.269	311.257
666.657	206.707		666.657	325.289
668.045	209.908		668.045	326.997
669.433	200.909		669.433	307.723
670.821	181.962		670.821	273.17
672.209	158.799		672.209	237.199
673.596	136.219		673.596	205.402
674.983	116.549		674.983	175.921
676.37	99.1489		676.37	148.506
677.757	81.5649		677.757	124.75
679.143	63.5474		679.143	105.2
680.529	47.5181		680.529	89.6371
681.915	35.0864		681.915	77.0309
683.301	27.5649		683.301	66.2719
684.687	25.4849		684.687	57.1569
686.072	24.5649		686.072	48.7172
687.457	20.2897		687.457	39.9843
688.842	14.2216		688.842	32.5364
690.227	9.51691		690.227	27.9986
691.611	7.0976		691.611	25.0742
692.995	6.8075		692.995	21.8728
694.379	7.16235		694.379	18.879
695.763	6.83405		695.763	17.4054
697.147	6.15088		697.147	16.5305
698.53	6.03479		698.53	14.8953
699.913	8.00159		699.913	13.5781
701.296	13.0201		701.296	13.2983
702.678	19.5281		702.678	12.4
704.061	25.7288		704.061	10.1495
705.443	32.7787		705.443	7.79761
706.825	42.8031		706.825	5.75134
708.207	55.4272		708.207	3.16815
709.588	68.6202		709.588	0.0651855
710.97	79.8042		710.97	-2.58698
712.351	84.8547		712.351	-4.34808
713.731	80.9128		713.731	-5.26422
715.112	70.0571		715.112	-4.84924
716.492	56.3354		716.492	-2.42426
717.873	42.0452		717.873	0.969971
719.253	29.5428		719.253	2.97632
720.632	21.7321		720.632	2.73566
722.012	18.1677		722.012	1.88879
723.391	15.1637		723.391	1.9826
724.77	10.4095		724.77	2.67334
726.149	4.36084		726.149	3.08618
727.528	-0.494202		727.528	3.09619
728.906	-1.27557		728.906	3.25024
730.284	1.25897		730.284	3.82983
731.662	3.16956		731.662	3.91241
733.04	2.62225		733.04	2.57385
734.417	0.807678		734.417	0.645386
735.794	-0.522827		735.794	-0.575867
737.172	-1.08173		737.172	-1.46478
738.548	-1.03363		738.548	-2.91174
739.925	-0.579346		739.925	-4.07281
741.301	0.75238		741.301	-3.44769
742.677	1.7536		742.677	-1.06732
744.053	-0.0540771		744.053	1.58942
745.429	-3.61462		745.429	3.1908
746.805	-5.24939		746.805	2.70502
748.18	-4.23956		748.18	0.819031
749.555	-2.50714		749.555	-0.21759
750.93	-0.598938		750.93	1.17291
752.304	2.67249		752.304	3.81787
753.679	6.66663		753.679	4.68207
755.053	8.21155		755.053	2.76965
756.427	5.93231		756.427	0.174194
757.8	2.11017		757.8	-1.5108
759.174	-0.442383		759.174	-2.41223
760.547	-0.615784		760.547	-2.33472
761.92	0.918091		761.92	-1.66345
763.293	2.06549		763.293	-1.81372
764.666	0.998413		764.666	-2.40637
766.038	-1.39233		766.038	-1.82135
767.41	-2.27869		767.41	-0.185242
768.782	-0.722839		768.782	1.52936
770.154	1.53271		770.154	3.42926
771.525	2.60413		771.525	5.2937
772.897	1.9928		772.897	5.94928
774.268	0.254822		774.268	5.14502
775.639	-1.67035		775.639	4.08301
777.009	-2.89972		777.009	3.12189
778.38	-2.84058		778.38	0.948608
779.75	-1.65295		779.75	-2.5155
781.12	-0.204102		781.12	-4.5365
782.49	1.25073		782.49	-3.00537
783.859	2.94244		783.859	0.171326
785.228	3.9621		785.228	1.64954
786.597	2.90149		786.597	0.882202
787.966	1.04034		787.966	-0.421875
789.335	1.18988		789.335	-0.762024
790.703	2.81787		790.703	-0.0788574
792.072	2.97034		792.072	0.444519
793.439	1.20911		793.439	0.539246
794.807	-0.731995		794.807	0.813293
796.175	-2.47797		796.175	0.919556
797.542	-4.21045		797.542	0.254639
798.909	-4.73669		798.909	-0.281128
800.276	-3.03168		800.276	0.105347
801.643	-0.314758		801.643	1.03644
803.009	2.38165		803.009	2.27588
804.375	5.15027		804.375	3.30652
805.741	6.43872		805.741	2.59375
807.107	4.50946		807.107	-0.323303
808.473	1.14581		808.473	-3.5072
809.838	-1.17004		809.838	-4.95551
811.203	-2.74805		811.203	-4.36658
812.568	-3.78357		812.568	-2.43701
813.933	-2.62561		813.933	-0.420349
815.297	-0.0120239		815.297	1.1037
816.662	0.804077		816.662	2.56934
818.026	-0.542786		818.026	3.71686
819.389	-1.29236		819.389	4.13422
820.753	-0.702942		820.753	4.47388
822.116	0.762512		822.116	4.88934
823.48	2.70013		823.48	4.70691
824.842	4.16455		824.842	4.44067
826.205	4.36945		826.205	5.43323
827.568	3.70178		827.568	6.90247
828.93	3.53394		828.93	6.05072
830.292	4.61395		830.292	2.12744
831.654	5.94031		831.654	-2.33667
833.016	6.48047		833.016	-4.85767
834.377	6.07715		834.377	-4.90973
835.738	4.82336		835.738	-3.05048
837.099	3.39032		837.099	-0.686279
838.46	2.44922		838.46	0.194702
839.82	2.2652		839.82	-1.08533
841.181	3.18164		841.181	-2.8858
842.541	4.54187		842.541	-2.61298
843.901	4.51746		843.901	0.33374
845.26	2.43634		845.26	2.81403
846.62	-0.326904		846.62	3.05615
847.979	-2.51019		847.979	2.02588
849.338	-4.08429		849.338	1.92493
850.697	-5.46326		850.697	3.79681
852.056	-5.71136		852.056	7.42877
853.414	-3.55695		853.414	11.3305
854.772	0.264465		854.772	14.3107
856.13	3.89246		856.13	16.7262
857.488	6.54492		857.488	19.1063
858.845	7.50244		858.845	21.1213
860.203	6.13947		860.203	21.9576
861.56	4.28363		861.56	20.9112
862.917	4.62195		862.917	18.747
864.273	6.8728		864.273	17.8393
865.63	8.37964		865.63	18.7189
866.986	8.39221		866.986	18.5261
868.342	8.70715		868.342	15.9166
869.698	9.54291		869.698	13.812
871.053	8.91504		871.053	14.1809
872.408	6.43262		872.408	14.9135
873.764	4.37683		873.764	14.1036
875.119	4.66937		875.119	12.8601
876.473	5.98206		876.473	12.7455
877.828	5.23657		877.828	13.4628
879.182	2.6673		879.182	13.4806
880.536	2.38348		880.536	11.2675
881.89	5.80688		881.89	6.88586
883.243	9.20312		883.243	3.97638
884.597	9.52527		884.597	6.21069
885.95	7.58575		885.95	10.4482
887.303	5.46271		887.303	10.5013
888.656	4.21863		888.656	6.57312
890.008	3.30652		890.008	2.91357
891.361	1.50769		891.361	0.647583
892.713	-0.990356		892.713	-0.896667
894.065	-2.4845		894.065	-1.56299
895.416	-2.24042		895.416	-1.46082
896.768	-1.47675		896.768	-0.762024
898.119	-1.06848		898.119	0.377136
899.47	-0.328125		899.47	0.972351
900.821	0.864197		900.821	0.251221
902.172	1.2356		902.172	-1.09998
903.522	0.459106		903.522	-1.69324
904.872	0.143677		904.872	-0.513733
906.222	1.2785		906.222	1.50049
907.572	2.2912		907.572	2.13013
908.921	1.23065		908.921	1.17163
910.271	-1.21576		910.271	0.484009
911.62	-2.47003		911.62	0.738831
912.969	-1.46991		912.969	1.38898
914.317	0.362793		914.317	2.21143
915.666	1.68408		915.666	2.52216
917.014	2.66589		917.014	1.75909
918.362	3.02643		918.362	0.734375
919.71	1.23438		919.71	-0.419495
921.058	-1.75238		921.058	-2.39423
922.405	-3.7558		922.405	-4.16467
923.752	-4.84747		923.752	-4.38702
925.099	-4.5658		925.099	-3.7608
926.446	-1.64825		926.446	-2.86902
927.792	2.52032		927.792	-0.624268
929.139	5.00482		929.139	2.85217
930.485	5.28619		930.485	5.36902
931.831	4.54749		931.831	5.42358
933.177	2.97113		933.177	4.00275
934.522	0.694092		934.522	2.59088
935.867	-0.907898		935.867	1.14618
937.212	-0.856812		937.212	-0.810059
938.557	-0.165283		938.557	-2.11566
939.902	-0.460205		939.902	-1.72955
941.246	-1.27454		941.246	-1.08173
942.59	-0.328125		942.59	-2.18268
943.934	1.85577		943.934	-4.93628
945.278	1.9964		945.278	-6.21393
946.622	-0.526428		946.622	-3.49878
947.965	-3.25238		947.965	1.31848
949.308	-4.44592		949.308	4.14301
950.651	-3.76685		950.651	3.69952
951.994	-1.78247		951.994	2.16467
953.336	-0.574524		953.336	1.18872
954.679	-1.85938		954.679	-0.105774
956.021	-4.01685		956.021	-1.33093
957.363	-3.27765		957.363	-1.88574
958.704	1.82373		958.704	-1.30658
960.046	8.36407		960.046	1.09247
961.387	11.7724		961.387	5.66748
962.728	9.74158		962.728	9.69
964.069	4.5144		964.069	10.7167
965.409	0.550476		965.409	10.6033
966.75	-0.971802		966.75	11.1125
968.09	-4.54779		968.09	11.7894
969.43	-9.64117		969.43	12.5544
970.77	-10.3329		970.77	13.2501
972.109	-4.50122		972.109	13.7037
973.448	2.10217		973.448	15.1489
974.788	3.38702		974.788	17.8818
976.126	0.489197		976.126	19.6365
977.465	-1.18256		977.465	19.3499
978.804	1.23138		978.804	19.2404
980.142	3.76471		980.142	20.9327
981.48	3.34326		981.48	23.1296
982.818	3.1983		982.818	24.7842
984.155	7.53876		984.155	26.8336
985.493	15.4764		985.493	29.6995
986.83	23.847		986.83	32.9131
988.167	32.3957		988.167	36.5366
989.504	42.2437		989.504	39.9294
990.84	53.5289		990.84	42.3256
992.177	67.5621		992.177	45.7878
993.513	84.9821		993.513	52.8158
994.849	100.929		994.849	61.7376
996.185	111.666		996.185	69.4439
997.52	122.553		997.52	76.3876
998.856	139.713		998.856	85.0844
1000.19	161.007		1000.19	97.2842
1001.53	182.073		1001.53	113.128
1002.86	203.286		1002.86	129.646
1004.19	225.849		1004.19	143.511
1005.53	248.309		1005.53	155.8
1006.86	269.197		1006.86	168.765
1008.2	286.324		1008.2	180.998
1009.53	295.769		1009.53	189.296
1010.86	295.657		1010.86	190.519
1012.2	285.644		1012.2	182.136
1013.53	264.9		1013.53	165.411
1014.86	235.88		1014.86	145.253
1016.2	203.802		1016.2	124.612
1017.53	170.744		1017.53	103.1
1018.86	136.675		1018.86	81.872
1020.19	104.891		1020.19	64.6158
1021.52	79.8303		1021.52	52.7376
1022.86	60.5547		1022.86	44.3783
1024.19	43.9081		1024.19	37.7722
1025.52	30.8748		1025.52	31.9662
1026.85	22.1737		1026.85	26.8356
1028.18	15.6014		1028.18	24.1304
1029.51	11.5487		1029.51	24.9912
1030.84	11.6718		1030.84	26.9808
1032.17	13.0331		1032.17	26.568
1033.5	10.6639		1033.5	23.1748
1034.83	4.82996		1034.83	19.1765
1036.16	0.624817		1036.16	16.5264
1037.49	-0.0137939		1037.49	14.7872
1038.82	-0.0859375		1038.82	13.2717
1040.15	-0.888428		1040.15	12.3552
1041.48	-0.0774536		1041.48	11.71
1042.8	2.87823		1042.8	10.8051
1044.13	4.79126		1044.13	10.5475
1045.46	3.77112		1045.46	11.6251
1046.79	2.03656		1046.79	13.0857
1048.12	1.94714		1048.12	13.6801
1049.44	2.1405		1049.44	12.675
1050.77	0.165955		1050.77	9.9314
1052.1	-3.57037		1052.1	6.82611
1053.42	-6.27155		1053.42	5.315
1054.75	-5.68762		1054.75	5.08936
1056.08	-2.22473		1056.08	4.18622
1057.4	1.38269		1057.4	2.25592
1058.73	4.02527		1058.73	0.458008
1060.05	6.79694		1060.05	-0.424683
1061.38	8.77563		1061.38	0.242371
1062.7	8.35223		1062.7	2.09253
1064.03	7.82355		1064.03	2.37738
1065.35	11.0179		1065.35	0.0444946
1066.68	17.9821		1066.68	-1.78485
1068	25.8725		1068	-1.20795
1069.33	33.7518		1069.33	0.0528564
1070.65	43.2296		1070.65	0.652649
1071.98	56.6182		1071.98	0.225952
1073.3	77.8867		1073.3	-1.1731
1074.62	112.238		1074.62	-1.9267
1075.95	162.892		1075.95	-1.19232
1077.27	233.364		1077.27	-0.59613
1078.59	334.717		1078.59	-1.2572
1079.91	481.981		1079.91	-1.94348
1081.24	676.409		1081.24	-1.31012
1082.56	893.202		1082.56	0.0950928
1083.88	1084.13		1083.88	0.595276
1085.2	1190.69		1085.2	0.0786133
1086.52	1171.14		1086.52	-0.0384521
1087.85	1030.56		1087.85	1.1911
1089.17	821.099		1089.17	2.58295
1090.49	605.148		1090.49	2.5871
1091.81	419.334		1091.81	0.825989
1093.13	273.345		1093.13	-1.64972
1094.45	167.716		1094.45	-3.49036
1095.77	99.3549		1095.77	-3.37378
1097.09	58.9217		1097.09	-0.952881
1098.41	35.0309		1098.41	2.14874
1099.73	19.9874		1099.73	3.88464
1101.05	10.0698		1101.05	3.5553
1102.37	3.17877		1102.37	1.77887
1103.69	-1.8233		1103.69	0.254822
1105	-4.33093		1105	-0.480591
1106.32	-5.23315		1106.32	-1.23029
1107.64	-5.54089		1107.64	-1.90985
1108.96	-6.90387		1108.96	-1.29089
1110.28	-5.79089		1110.28	-0.0516968
1111.59	-2.72839		1111.59	0.17157
1112.91	-0.40625		1112.91	-0.890625
1114.23	0.777649		1114.23	-2.02673
1115.55	0.831726		1115.55	-1.86176
1116.86	-0.982483		1116.86	-0.00891113
1118.18	-3.59357		1118.18	2.51984
1119.5	-4.32361		1119.5	3.39655
1120.81	-2.02686		1120.81	1.48077
1122.13	2.07019		1122.13	-1.3053
1123.44	5.7464		1123.44	-1.43018
1124.76	6.66107		1124.76	1.74707
1126.08	4.22168		1126.08	4.67993
1127.39	0.342651		1127.39	4.58765
1128.71	-2.98969		1128.71	3.29871
1130.02	-4.30396		1130.02	3.81384
1131.33	-2.94354		1131.33	5.46191
1132.65	-0.210938		1132.65	5.74377
1133.96	1.3559		1133.96	4.50439
1135.28	0.871399		1135.28	2.91699
1136.59	-0.345398		1136.59	1.23364
1137.9	-0.620789		1137.9	-0.334534
1139.22	-0.189087		1139.22	-1.11127
1140.53	0.55896		1140.53	-1.13379
1141.84	1.35779		1141.84	-1.05255
1143.16	2.01984		1143.16	-0.670349
1144.47	3.32648		1144.47	0.703613
1145.78	5.02765		1145.78	2.47717
1147.09	4.90466		1147.09	3.27887
1148.41	3.03564		1148.41	2.91345
1149.72	1.85809		1149.72	1.31464
1151.03	1.65344		1151.03	-1.60083
1152.34	1.40601		1152.34	-3.72174
1153.65	1.14722		1153.65	-3.31097
1154.96	0.955139		1154.96	-1.62598
1156.27	0.720642		1156.27	-0.00793457
1157.58	0.131165		1157.58	1.6983
1158.89	-1.35992		1158.89	3.05286
1160.2	-2.73688		1160.2	2.86017
1161.51	-1.87457		1161.51	0.858704
1162.82	1.03961		1162.82	-1.46729
1164.13	2.99036		1164.13	-1.80536
1165.44	2.16528		1165.44	-0.280701
1166.75	0.814636		1166.75	0.700378
1168.06	1.84503		1168.06	0.481567
1169.37	4.35046		1169.37	0.734741
1170.68	5.40948		1170.68	1.99097
1171.98	4.72559		1171.98	2.64087
1173.29	4.92432		1173.29	1.9657
1174.6	7.34998		1174.6	1.24664
1175.91	10.0657		1175.91	0.811707
1177.22	10.4943		1177.22	0.0203857
1178.52	7.83984		1178.52	-0.101929
1179.83	3.72858		1179.83	1.30981
1181.14	0.724548		1181.14	2.77136
1182.44	-0.607788		1182.44	2.72021
1183.75	-1.00012		1183.75	1.42188
1185.06	-0.6521		1185.06	0.548279
1186.36	-0.464722		1186.36	1.39636
1187.67	-0.85199		1187.67	2.60669
1188.97	0.283936		1188.97	1.67932
1190.28	3.53723		1190.28	-0.604553
1191.58	5.07935		1191.58	-1.40747
1192.89	2.43683		1192.89	-1.08734
1194.19	-1.53595		1194.19	-2.13562
1195.5	-3.22766		1195.5	-3.72473
1196.8	-2.90131		1196.8	-3.12073
1198.11	-2.08447		1198.11	-0.2771
1199.41	-0.0845947		1199.41	3.05286
1200.71	3.63745		1200.71	5.66986
1202.02	6.2981		1202.02	6.46533
1203.32	4.96875		1203.32	4.34497
1204.62	1.02234		1204.62	-0.0510254
1205.93	-2.12262		1205.93	-3.87927
1207.23	-3.30994		1207.23	-4.0307
1208.53	-3.25854		1208.53	-0.397278
1209.84	-2.93719		1209.84	3.59192
1211.14	-2.14288		1211.14	4.88263
1212.44	-0.172607		1212.44	3.28717
1213.74	2.12988		1213.74	0.320923
1215.04	3.46765		1215.04	-1.71045
1216.34	4.02814		1216.34	-1.26813
1217.64	4.26453		1217.64	0.116333
1218.95	4.17664		1218.95	0.302124
1220.25	4.4364		1220.25	-0.367249
1221.55	5.45007		1221.55	-0.938782
1222.85	6.21765		1222.85	-0.94397
1224.15	6.33289		1224.15	0.50769
1225.45	6.42072		1225.45	2.94733
1226.75	5.40314		1226.75	4.21857
1228.05	1.77386		1228.05	3.43073
1229.35	-2.58746		1229.35	1.22437
1230.65	-4.92926		1230.65	-1.38641
1231.94	-5.5014		1231.94	-2.60516
1233.24	-4.92889		1233.24	-1.36768
1234.54	-2.52417		1234.54	0.513611
1235.84	0.822144		1235.84	0.538513
1237.14	3.03363		1237.14	-0.667908
1238.44	3.81677		1238.44	-0.433899
1239.73	3.45215		1239.73	1.2356
1241.03	2.10657		1241.03	1.80048
1242.33	0.834229		1242.33	0.384644
1243.63	0.962219		1243.63	-1.33533
1244.92	2.41156		1244.92	-2.07764
1246.22	3.24408		1246.22	-2.08777
1247.52	2.11548		1247.52	-1.55994
1248.81	0.572144		1248.81	-0.277649
1250.11	0.441711		1250.11	1.62262
1251.4	0.614441		1251.4	2.80219
1252.7	-0.425598		1252.7	1.94385
1253.99	-1.3974		1253.99	-0.141479
1255.29	-0.707458		1255.29	-0.722717
1256.59	0.706421		1256.59	0.557556
1257.88	1.37543		1257.88	1.79883
1259.17	1.67426		1259.17	2.90369
1260.47	2.41949		1260.47	4.55585
1261.76	2.4314		1261.76	5.51819
1263.06	0.38623		1263.06	5.27325
1264.35	-2.53143		1264.35	4.91327
1265.65	-3.85553		1265.65	4.15582
1266.94	-2.9317		1266.94	2.45319
1268.23	0.00396729		1268.23	1.47644
1269.53	4.48163		1269.53	2.67816
1270.82	7.85962		1270.82	4.5578
1272.11	7.15271		1272.11	4.80243
1273.4	3.42273		1273.4	3.89606
1274.7	0.622253		1274.7	3.74463
1275.99	0.297607		1275.99	4.03534
1277.28	0.167175		1277.28	4.20551
1278.57	-1.98822		1278.57	6.30176
1279.86	-4.79382		1279.86	12.8396
1281.15	-4.79688		1281.15	24.8812
1282.44	-1.53503		1282.44	40.161
1283.74	1.56311		1283.74	50.6006
1285.03	1.99701		1285.03	48.2001
1286.32	1.04742		1286.32	35.4591
1287.61	1.04193		1287.61	22.6902
1288.9	2.43347		1288.9	15.1277
1290.19	4.12781		1290.19	10.5995
1291.48	5.49976		1291.48	7.27771
1292.77	6.72095		1292.77	5.42761
1294.06	7.85358		1294.06	4.59619
1295.34	8.53815		1295.34	4.11145
1296.63	7.60266		1296.63	3.47345
1297.92	4.28125		1297.92	1.86957
1299.21	0.214417		1299.21	-0.309509
1300.5	-2.20728		1300.5	-1.75128
1301.79	-2.10901		1301.79	-2.06525
1303.08	-0.0689087		1303.08	-0.829407
1304.36	1.97498		1304.36	1.98737
1305.65	2.2536		1305.65	4.11957
1306.94	0.864563		1306.94	4.14532
1308.22	-1.03607		1308.22	3.75208
1309.51	-1.5108		1309.51	3.70557
1310.8	0.799683		1310.8	2.66199
1312.08	3.70789		1312.08	0.543335
1313.37	3.93256		1313.37	-1.25983
1314.66	2.02045		1314.66	-1.76294
1315.94	0.565369		1315.94	-1.01288
1317.23	0.00482178		1317.23	-0.150269
1318.51	-0.519592		1318.51	-0.318481
1319.8	-0.975769		1319.8	-1.50964
1321.08	-1.66083		1321.08	-2.50598
1322.37	-2.87195		1322.37	-2.08051
1323.65	-3.42169		1323.65	-0.477173
1324.94	-1.6142		1324.94	1.06128
1326.22	2.22662		1326.22	1.8714
1327.51	5.33801		1327.51	1.70721
1328.79	5.61035		1328.79	0.583252
1330.08	4.12164		1330.08	-0.48645
1331.36	2.88739		1331.36	-0.505188
1332.64	1.62634		1332.64	0.636108
1333.93	-0.708557		1333.93	2.40863
1335.21	-2.78931		1335.21	3.66974
1336.49	-2.58466		1336.49	4.47815
1337.77	-0.860229		1337.77	5.90924
1339.06	0.305664		1339.06	6.71118
1340.34	0.74115		1340.34	4.56995
1341.62	1.22748		1341.62	0.25
1342.9	1.68652		1342.9	-3.46826
1344.18	1.75879		1344.18	-5.32001
1345.46	1.61621		1345.46	-5.29016
1346.75	2.10254		1346.75	-2.87927
1348.03	4.18646		1348.03	1.05286
1349.31	7.66498		1349.31	3.39349
1350.59	10.3818		1350.59	3.05664
1351.87	9.93066		1351.87	1.27087
1353.15	6.99915		1353.15	-0.545715
1354.43	4.72791		1354.43	-0.520874
1355.71	4.05444		1355.71	2.46857
1356.99	3.11951		1356.99	5.79608
1358.27	1.20447		1358.27	5.53864
1359.55	-0.284424		1359.55	1.97662
1360.83	-0.581482		1360.83	-0.953247
1362.1	-0.592773		1362.1	-0.892151
1363.38	-0.927612		1363.38	1.04999
1364.66	-1.08588		1364.66	2.66962
1365.94	-0.864197		1365.94	2.77887
1367.22	-0.465149		1367.22	1.39307
1368.49	0.0757446		1368.49	-0.597412
1369.77	0.487976		1369.77	-2.03668
1371.05	-0.260803		1371.05	-1.94037
1372.33	-1.97357		1372.33	0.394287
1373.6	-2.9375		1373.6	3.98285
1374.88	-1.96667		1374.88	6.02826
1376.16	0.330627		1376.16	5.24915
1377.43	2.32629		1377.43	3.37976
1378.71	2.83862		1378.71	2.65442
1379.99	2.52625		1379.99	4.11993
1381.26	2.66705		1381.26	8.30737
1382.54	2.57343		1382.54	16.5762
1383.81	1.28784		1383.81	31.6918
1385.09	-0.226013		1385.09	53.3096
1386.36	-1.4718		1386.36	71.8658
1387.64	-2.90527		1387.64	74.3937
1388.91	-3.26276		1388.91	58.8778
1390.19	-1.2254		1390.19	36.5522
1391.46	1.4447		1391.46	19.2609
1392.74	1.87262		1392.74	10.66
1394.01	0.228699		1394.01	8.99939
1395.28	-0.568054		1395.28	10.5761
1396.56	0.490112		1396.56	10.5619
1397.83	1.41376		1397.83	7.19122
1399.1	1.26166		1399.1	3.72968
1400.38	1.53137		1400.38	2.56787
1401.65	3.37701		1401.65	1.84656
1402.92	5.92206		1402.92	0.409363
1404.19	7.30597		1404.19	0.60022
1405.47	7.18396		1405.47	3.70026
1406.74	6.97705		1406.74	7.52216
1408.01	7.30957		1408.01	9.95654
1409.28	7.41534		1409.28	10.4409
1410.55	6.91882		1410.55	8.64734
1411.82	6.33527		1411.82	5.09143
1413.09	6.07056		1413.09	1.58575
1414.36	5.59302		1414.36	-0.0413818
1415.63	3.65247		1415.63	0.616333
1416.91	0.123657		1416.91	2.12152
1418.18	-2.57184		1418.18	2.69312
1419.45	-1.68414		1419.45	1.92499
1420.71	2.16162		1420.71	0.395447
1421.98	5.46521		1421.98	-1.79535
1423.25	6.36713		1423.25	-4.28009
1424.52	6.39856		1424.52	-5.37122
1425.79	7.01245		1425.79	-3.58447
1427.06	6.91193		1427.06	0.189575
1428.33	5.26868		1428.33	4.04468
1429.6	4.95776		1429.6	6.84009
1430.87	8.01025		1430.87	7.90405
1432.13	12.1449		1432.13	7.11145
1433.4	15.4398		1433.4	5.0874
1434.67	18.0511		1434.67	2.51941
1435.94	19.5883		1435.94	0.56366
1437.2	19.3636		1437.2	0.423401
1438.47	16.6117		1438.47	1.0517
1439.74	11.098		1439.74	0.964294
1441	5.15076		1441	1.52051
1442.27	1.50421		1442.27	3.37677
1443.54	0.439758		1443.54	3.70496
1444.8	1.80115		1444.8	1.78632
1446.07	5.40088		1446.07	1.05371
1447.33	8.47339		1447.33	2.5882
1448.6	8.2843		1448.6	4.15729
1449.86	6.05255		1449.86	5.4798
1451.13	4.01245		1451.13	6.61829
1452.39	2.25793		1452.39	5.01038
1453.66	0.882751		1453.66	0.249939
1454.92	0.918335		1454.92	-3.88159
1456.19	1.98975		1456.19	-4.83728
1457.45	2.33148		1457.45	-3.4762
1458.72	1.58441		1458.72	-1.15753
1459.98	0.764282		1459.98	0.947021
1461.24	-0.00378418		1461.24	1.35339
1462.51	-0.750732		1462.51	0.320923
1463.77	-0.554443		1463.77	-0.224487
1465.03	0.647583		1465.03	0.73291
1466.3	1.34979		1466.3	2.63074
1467.56	0.355225		1467.56	3.82837
1468.82	-1.41388		1468.82	2.57404
1470.08	-1.3009		1470.08	-0.228394
1471.34	1.55408		1471.34	-1.8642
1472.61	4.08032		1472.61	-1.9964
1473.87	3.18408		1473.87	-1.78076
1475.13	-0.473694		1475.13	-2.07074
1476.39	-3.56488		1476.39	-2.6911
1477.65	-3.8822		1477.65	-2.71393
1478.91	-1.79279		1478.91	-1.28607
1480.17	0.812012		1480.17	1.05737
1481.43	1.79205		1481.43	2.39319
1482.69	0.347351		1482.69	2.14423
1483.95	-1.64746		1483.95	1.55884
1485.21	-2.24451		1485.21	1.66516
1486.47	-1.30688		1486.47	3.15643
1487.73	0.563782		1487.73	5.33942
1488.99	2.9093		1488.99	6.25714
1490.25	4.83539		1490.25	5.84454
1491.51	5.49567		1491.51	5.42767
1492.77	4.68506		1492.77	4.75519
1494.03	2.23016		1494.03	2.98218
1495.28	-1.19843		1495.28	0.357605
1496.54	-2.80487		1496.54	-2.21283
1497.8	-0.73053		1497.8	-3.49548
1499.06	2.64893		1499.06	-2.69403
1500.32	4.09845		1500.32	-0.840027
1501.57	3.41443		1501.57	0.0661011
1502.83	2.04962		1502.83	-0.00720215
1504.09	1.39423		1504.09	0.783569
1505.34	1.83856		1505.34	2.48499
1506.6	1.63239		1506.6	3.48749
1507.86	-0.880798		1507.86	4.08777
1509.11	-4.15442		1509.11	5.30133
1510.37	-5.12604		1510.37	6.39362
1511.62	-2.83124		1511.62	6.78638
1512.88	1.07697		1512.88	6.90143
1514.13	4.14618		1514.13	6.67609
1515.39	5.03247		1515.39	5.86029
1516.64	4.41827		1516.64	4.92279
1517.9	3.52332		1517.9	4.44153
1519.15	1.91412		1519.15	3.71338
1520.41	-0.92511		1520.41	1.39459
1521.66	-3.15063		1521.66	-1.89001
1522.92	-2.80945		1522.92	-3.95282
1524.17	-0.870422		1524.17	-3.90338
1525.42	0.291443		1525.42	-2.42908
1526.68	0.191711		1526.68	-0.467529
1527.93	0.189697		1527.93	0.941223
1529.18	1.01984		1529.18	0.95929
1530.44	2.54132		1530.44	-0.00695801
1531.69	4.45734		1531.69	-0.141052
1532.94	5.78351		1532.94	1.40063
1534.19	5.94171		1534.19	3.41479
1535.45	5.78748		1535.45	4.88568
1536.7	5.57458		1536.7	6.0788
1537.95	4.02179		1537.95	7.0722
1539.2	0.613586		1539.2	7.64709
1540.45	-2.83752		1540.45	8.05328
1541.7	-3.61279		1541.7	8.13458
1542.95	-1.05591		1542.95	7.10956
1544.21	2.39563		1544.21	5.11884
1545.46	4.0545		1545.46	3.63116
1546.71	3.56128		1546.71	3.78705
1547.96	1.6839		1547.96	4.85217
1549.21	-0.89856		1549.21	4.57648
1550.46	-3.03741		1550.46	1.85052
1551.71	-3.31445		1551.71	-1.12256
1552.95	-1.7948		1552.95	-1.68652
1554.2	-0.183533		1554.2	-0.716309
1555.45	0.761841		1555.45	-0.461975
1556.7	1.07257		1556.7	-0.954773
1557.95	0.503357		1557.95	-0.694702
1559.2	0.584473		1559.2	0.707397
1560.45	3.67444		1560.45	1.46381
1561.7	8.05383		1561.7	-0.134094
1562.94	8.80023		1562.94	-1.79669
1564.19	4.70996		1564.19	-1.01038
1565.44	0.0170288		1565.44	1.25464
1566.69	-1.29462		1566.69	3.16907
1567.93	0.321655		1567.93	4.09143
1569.18	1.67798		1569.18	5.06781
1570.43	1.11786		1570.43	7.76953
1571.67	-0.218201		1571.67	10.7273
1572.92	-0.81488		1572.92	10.5813
1574.17	-0.49939		1574.17	7.5343
1575.41	-0.0344238		1575.41	4.5235
1576.66	-0.201904		1576.66	2.50171
1577.9	-0.65863		1577.9	0.65625
1579.15	-0.639465		1579.15	-0.606873
1580.39	0.183167		1580.39	-0.272156
1581.64	1.22003		1581.64	1.2226
1582.88	1.38647		1582.88	2.98676
1584.13	0.88739		1584.13	4.64514
1585.37	0.612976		1585.37	4.91644
1586.62	0.47406		1586.62	2.48798
1587.86	0.540771		1587.86	-1.34973
1589.1	0.0604858		1589.1	-3.63892
1590.35	-1.81262		1590.35	-4.01288
1591.59	-3.01758		1591.59	-4.39508
1592.83	-1.24304		1592.83	-4.63257
1594.08	1.3775		1594.08	-2.81317
1595.32	1.98987		1595.32	0.823303
1596.56	1.97046		1596.56	3.85144
1597.8	3.58423		1597.8	4.87396
1599.05	6.28375		1599.05	4.24445
1600.29	8.36536		1600.29	3.22473
1601.53	8.39117		1601.53	2.67145
1602.77	6.1264		1602.77	2.05151
1604.01	3.10205		1604.01	0.738403
1605.26	0.708374		1605.26	-0.253418
1606.5	-0.414246		1606.5	0.762695
1607.74	-0.250305		1607.74	3.5047
1608.98	-0.0813599		1608.98	5.3783
1610.22	-0.173157		1610.22	5.19543
1611.46	1.30231		1611.46	4.67444
1612.7	4.28241		1612.7	4.48682
1613.94	5.75128		1613.94	3.52289
1615.18	4.24023		1615.18	2.48553
1616.42	1.7334		1616.42	3.04626
1617.66	-0.112915		1617.66	4.34564
1618.9	-2.22076		1618.9	4.25848
1620.14	-4.46515		1620.14	3.01892
1621.38	-4.14301		1621.38	2.17371
1622.61	-0.973083		1622.61	1.53522
1623.85	1.77887		1623.85	0.822083
1625.09	2.56256		1625.09	1.08112
1626.33	2.10144		1626.33	2.23413
1627.57	0.395386		1627.57	3.20282
1628.8	-1.15533		1628.8	3.59656
1630.04	0.0761719		1630.04	2.83661
1631.28	3.39062		1631.28	0.467896
1632.52	5.00671		1632.52	-2.33533
1633.75	2.65863		1633.75	-3.85425
1634.99	-1.9118		1634.99	-3.38586
1636.23	-4.85223		1636.23	-0.930115
1637.46	-4.67841		1637.46	2.91913
1638.7	-2.84357		1638.7	6.19318
1639.94	-0.519775		1639.94	6.32953
1641.17	2.24603		1641.17	3.03119
1642.41	5.04742		1642.41	-0.967346
1643.64	6.33752		1643.64	-2.96307
1644.88	5.45996		1644.88	-1.94025
1646.11	5.11774		1646.11	1.67926
1647.35	6.98273		1647.35	5.11414
1648.58	7.61737		1648.58	5.41138
1649.82	5.05292		1649.82	2.97717
1651.05	2.64148		1651.05	-0.588623
1652.29	2.3114		1652.29	-4.16711
1653.52	2.2196		1653.52	-5.44574
1654.75	1.24109		1654.75	-2.9715
1655.99	-0.655334		1655.99	0.829773
1657.22	-3.04791		1657.22	2.42902
1658.45	-3.35846		1658.45	1.39056
1659.69	-0.165161		1659.69	0.573792
1660.92	3.2196		1660.92	2.1192
1662.15	3.8114		1662.15	4.74567
1663.38	2.93835		1663.38	6.53119
1664.62	2.49121		1664.62	7.03839
1665.85	2.1731		1665.85	6.29852
1667.08	1.15594		1667.08	5.03027
1668.31	-0.247742		1668.31	4.24939
1669.54	-1.66278		1669.54	3.76831
1670.77	-3.37048		1670.77	3.29028
1672.01	-3.55817		1672.01	3.44025
1673.24	0.055542		1673.24	3.92151
1674.47	4.3457		1674.47	3.46844
1675.7	4.98438		1675.7	2.56543
1676.93	3.55127		1676.93	2.71265
1678.16	2.70392		1678.16	3.31641
1679.39	0.332397		1679.39	2.75171
1680.62	-3.93866		1680.62	1.25317
1681.85	-5.34399		1681.85	0.227173
1683.08	-1.24341		1683.08	-0.0450439
1684.31	4.03479		1684.31	-0.344421
1685.53	5.31848		1685.53	-0.577087
1686.76	3.20111		1686.76	0.350952
1687.99	1.60443		1687.99	2.03363
1689.22	2.6377		1689.22	2.02405
1690.45	4.91003		1690.45	-0.416565
1691.68	5.51508		1691.68	-2.84717
1692.9	3.98401		1692.9	-3.24231
1694.13	2.32581		1694.13	-2.32452
1695.36	1.82599		1695.36	-0.906738
1696.59	2.00238		1696.59	1.61816
1697.81	1.54248		1697.81	4.26379
1699.04	0.727356		1699.04	5.09131
1700.27	1.66644		1700.27	4.3183
1701.49	3.87518		1701.49	3.0531
1702.72	3.8692		1702.72	2.02954
1703.95	0.492188		1703.95	1.79376
1705.17	-3.80273		1705.17	1.6734
1706.4	-6.06244		1706.4	0.808594
1707.62	-4.64642		1707.62	0.0897827
1708.85	-0.335876		1708.85	0.922668
1710.07	3.77545		1710.07	2.90094
1711.3	5.06256		1711.3	4.19611
1712.52	3.27539		1712.52	4.22986
1713.75	0.257812		1713.75	4.26764
1714.97	-1.27142		1714.97	4.87183
1716.2	-0.171692		1716.2	4.51099
1717.42	1.77582		1717.42	2.2475
1718.65	2.55548		1718.65	0.253174
1719.87	2.55811		1719.87	0.715332
1721.09	2.22113		1721.09	2.39954
1722.32	0.491577		1722.32	2.69641
1723.54	-1.77216		1723.54	0.762024
1724.76	-2.91455		1724.76	-1.65363
1725.99	-3.17126		1725.99	-2.14429
1727.21	-2.94958		1727.21	-1.00702
1728.43	-1.40649		1728.43	-0.226074
1729.65	1.19171		1729.65	0.292114
1730.87	2.67242		1730.87	1.64142
1732.1	2.48523		1732.1	3.05609
1733.32	2.75433		1733.32	3.31738
1734.54	4.63953		1734.54	2.92535
1735.76	7.23419		1735.76	2.83301
1736.98	9.3504		1736.98	2.25922
1738.2	10.7692		1738.2	0.250793
1739.42	12.3185		1739.42	-1.39539
1740.64	14.1387		1740.64	-0.601074
1741.86	16.1201		1741.86	1.36798
1743.08	19.8253		1743.08	2.23071
1744.3	25.6601		1744.3	1.95575
1745.52	31.1245		1745.52	2.02765
1746.74	34.9684		1746.74	2.72461
1747.96	37.6292		1747.96	2.1604
1749.18	37.9349		1749.18	-1.07147
1750.4	35.3386		1750.4	-4.54926
1751.62	31.8558		1751.62	-4.88507
1752.84	28.5645		1752.84	-1.93713
1754.06	24.871		1754.06	2.15515
1755.28	21.119		1755.28	5.32916
1756.49	18.2772		1756.49	5.9129
1757.71	15.955		1757.71	3.45319
1758.93	12.9804		1758.93	0.0593262
1760.15	9.66595		1760.15	-1.36261
1761.36	7.60541		1761.36	-0.468811
1762.58	6.98627		1762.58	1.00616
1763.8	5.96472		1763.8	2.14044
1765.02	3.66589		1765.02	3.69965
1766.23	1.94916		1766.23	6.63678
1767.45	2.68951		1767.45	9.3894
1768.66	5.32452		1768.66	8.89496
1769.88	7.80731		1769.88	5.59088
1771.1	8.45056		1771.1	2.6803
1772.31	6.94171		1772.31	0.944458
1773.53	3.82782		1773.53	-0.913452
1774.74	-0.109863		1774.74	-3.00293
1775.96	-3.5899		1775.96	-4.19879
1777.17	-5.64349		1777.17	-3.7981
1778.39	-6.12988		1778.39	-2.4892
1779.6	-4.87695		1779.6	-1.48077
1780.82	-2.05652		1780.82	-1.04639
1782.03	1.1911		1782.03	-0.461365
1783.24	3.41437		1783.24	0.909119
1784.46	3.98572		1784.46	3.10815
1785.67	3.29565		1785.67	5.99237
1786.89	2.62531		1786.89	8.34119
1788.1	2.66217		1788.1	8.02808
1789.31	3.07806		1789.31	5.0675
1790.52	3.51361		1790.52	2.34924
1791.74	4.03119		1791.74	1.45062
1792.95	4.17767		1792.95	0.808594
1794.16	3.18744		1794.16	0.110107
1795.37	2.21674		1795.37	1.24536
1796.59	2.46869		1796.59	3.41711
1797.8	1.97455		1797.8	3.46881
1799.01	-0.361145		1799.01	0.569397
1800.22	-2.16394		1800.22	-2.88983
1801.43	-2.25964		1801.43	-3.73529
1802.64	-1.9411		1802.64	-1.51404
1803.85	-2.06519		1803.85	1.07062
1805.06	-2.14136		1805.06	2.00293
1806.27	-1.41589		1806.27	1.34521
1807.49	-0.0759277		1807.49	-0.168274
1808.7	1.33472		1808.7	-0.92627
1809.91	2.61237		1809.91	0.681702
1811.11	3.11591		1811.11	2.78009
1812.32	2.34222		1812.32	2.00909
1813.53	1.39258		1813.53	-0.584778
1814.74	1.46527		1814.74	-0.926025
1815.95	1.96613		1815.95	1.74573
1817.16	1.61359		1817.16	4.56305
1818.37	0.438721		1818.37	5.13507
1819.58	-0.699524		1819.58	3.58649
1820.79	-1.89374		1820.79	1.82336
1821.99	-3.2345		1821.99	1.23615
1823.2	-3.78516		1823.2	0.887207
1824.41	-2.68744		1824.41	-0.786133
1825.62	-0.354858		1825.62	-2.79962
1826.82	2.42279		1826.82	-2.93463
1828.03	5.34814		1828.03	-1.31616
1829.24	7.54584		1829.24	0.321167
1830.44	6.67169		1830.44	1.16486
1831.65	1.9754		1831.65	1.41803
1832.86	-2.65265		1832.86	1.45551
1834.06	-2.83771		1834.06	1.20911
1835.27	0.544983		1835.27	0.807922
1836.48	3.2608		1836.48	0.541687
1837.68	2.96588		1837.68	0.237366
1838.89	0.691345		1838.89	-0.559021
1840.09	-0.937988		1840.09	-1.58264
1841.3	-0.35968		1841.3	-2.03717
1842.5	1.39484		1842.5	-1.43878
1843.71	2.35681		1843.71	0.0245972
1844.91	2.16675		1844.91	1.46198
1846.12	1.29327		1846.12	1.8418
1847.32	-0.0548096		1847.32	1.47626
1848.52	-0.870056		1848.52	1.8808
1849.73	-0.905579		1849.73	3.10205
1850.93	-1.60858		1850.93	2.98358
1852.13	-2.51025		1852.13	0.369019
1853.34	-0.907654		1853.34	-2.38245
1854.54	2.91785		1854.54	-2.56781
1855.74	5.435		1855.74	-1.51526
1856.95	5.87817		1856.95	-1.3656
1858.15	6.40344		1858.15	-0.931396
1859.35	6.21393		1859.35	0.599854
1860.55	3.01276		1860.55	1.94672
1861.76	-1.02826		1861.76	2.99988
1862.96	-2.08093		1862.96	4.04041
1864.16	-0.801636		1864.16	4.45898
1865.36	0.0753174		1865.36	4.44299
1866.56	0.456116		1866.56	4.55499
1867.76	0.778381		1867.76	4.74799
1868.96	0.167053		1868.96	4.91266
1870.16	-0.585999		1870.16	4.67401
1871.36	0.260193		1871.36	3.3288
1872.56	1.36157		1872.56	0.986511
1873.76	0.952454		1873.76	-1.16547
1874.96	-0.279968		1874.96	-2.18951
1876.16	-0.945129		1876.16	-1.55438
1877.36	-0.230713		1877.36	1.20862
1878.56	1.4726		1878.56	4.59937
1879.76	2.80524		1879.76	6.13092
1880.96	3.12659		1880.96	6.4624
1882.16	2.18646		1882.16	7.40619
1883.36	0.344299		1883.36	7.74371
1884.56	0.0842896		1884.56	5.69373
1885.76	2.84393		1885.76	2.1781
1886.95	6.04504		1886.95	-0.693604
1888.15	6.797		1888.15	-2.09326
1889.35	5.03729		1889.35	-2.55206
1890.55	2.28143		1890.55	-2.1167
1891.74	-0.017395		1891.74	0.181641
1892.94	-1.60919		1892.94	3.74933
1894.14	-2.86896		1894.14	5.50842
1895.33	-2.96863		1895.33	3.88281
1896.53	-1.07996		1896.53	1.42224
1897.73	1.48456		1897.73	-0.311646
1898.92	2.92804		1898.92	-2.48041
1900.12	3.37555		1900.12	-4.4884
1901.32	4.23334		1901.32	-3.44293
1902.51	6.36011		1902.51	0.671082
1903.71	9.20642		1903.71	4.43134
1904.9	11.2914		1904.9	5.69684
1906.1	11.6149		1906.1	5.26416
1907.29	10.4897		1907.29	4.47675
1908.49	8.43158		1908.49	3.31879
1909.68	5.14362		1909.68	1.22754
1910.88	1.29791		1910.88	-0.734619
1912.07	-0.777283		1912.07	-0.786682
1913.26	-0.222473		1913.26	0.446167
1914.46	1.15015		1914.46	0.838989
1915.65	1.55945		1915.65	0.0164795
1916.85	1.36505		1916.85	-0.521362
1918.04	1.64545		1918.04	0.241028
1919.23	1.16302		1919.23	1.42847
1920.42	-1.64276		1920.42	1.90033
1921.62	-5.03772		1921.62	1.85974
1922.81	-5.20941		1922.81	1.61902
1924	-1.32983		1924	1.11572
1925.19	3.17896		1925.19	0.630981
1926.39	4.41077		1926.39	0.117981
1927.58	2.72479		1927.58	-0.485901
1928.77	2.51166		1928.77	-0.243103
1929.96	6.11505		1929.96	1.1745
1931.15	10.5818		1931.15	2.07928
1932.34	11.8494		1932.34	0.7995
1933.54	8.90216		1933.54	-1.7431
1934.73	3.52136		1934.73	-2.78278
1935.92	-0.683716		1935.92	-1.10077
1937.11	-0.650574		1937.11	1.34973
1938.3	2.69904		1938.3	1.99072
1939.49	6.17755		1939.49	1.11902
1940.68	8.18488		1940.68	0.848877
1941.87	8.33527		1941.87	1.5791
1943.06	6.41144		1943.06	0.869629
1944.25	3.67902		1944.25	-2.00037
1945.43	2.41937		1945.43	-3.6416
1946.62	2.16376		1946.62	-0.805237
1947.81	0.0528564		1947.81	4.46088
1949	-2.97583		1949	7.37476
1950.19	-2.59406		1950.19	6.45148
1951.38	0.948303		1951.38	3.95612
1952.57	2.59033		1952.57	2.76324
1953.75	0.343811		1953.75	4.09125
1954.94	-3.646		1954.94	6.50232
1956.13	-5.75446		1956.13	7.36853
1957.32	-3.01324		1957.32	5.67487
1958.5	2.90625		1958.5	2.73566
1959.69	6.41827		1959.69	0.878784
1960.88	5.12311		1960.88	1.5885
1962.06	1.42419		1962.06	4.53644
1963.25	-2.21234		1963.25	8.50372
1964.44	-3.91077		1964.44	11.959
1965.62	-2.62762		1965.62	12.8865
1966.81	0.44873		1966.81	10.3955
1967.99	3.58258		1967.99	6.1579
1969.18	6.17932		1969.18	2.36096
1970.36	7.28491		1970.36	-0.90155
1971.55	5.55499		1971.55	-3.91089
1972.73	2.16071		1972.73	-4.94849
1973.92	0.101746		1973.92	-3.21741
1975.1	0.471313		1975.1	-1.24902
1976.29	2.12842		1976.29	-1.13702
1977.47	3.07275		1977.47	-1.51324
1978.66	2.16345		1978.66	-0.507996
1979.84	0.744019		1979.84	1.14185
1981.02	-0.629272		1981.02	1.86334
1982.21	-3.34381		1982.21	1.08978
1983.39	-6.16785		1983.39	-0.00292969
1984.57	-5.24408		1984.57	0.583618
1985.76	-0.777161		1985.76	3.11176
1986.94	3.10352		1986.94	5.18677
1988.12	4.41418		1988.12	4.41241
1989.3	4.25122		1989.3	0.829773
1990.49	3.25		1990.49	-3.51807
1991.67	2.03333		1991.67	-5.9776
1992.85	0.815002		1992.85	-4.48816
1994.03	-1.18933		1994.03	0.10498
1995.21	-3.44263		1995.21	4.19128
1996.4	-3.64563		1996.4	5.62689
1997.58	-0.806213		1997.58	5.03363
1998.76	3.39868		1998.76	3.58099
1999.94	6.29352		1999.94	2.18237
2001.12	6.03192		2001.12	0.774719
2002.3	2.78381		2002.3	-1.25189
2003.48	-0.843018		2003.48	-2.92914
2004.66	-1.38098		2004.66	-2.92334
2005.84	2.01263		2005.84	-1.74121
2007.02	6.02448		2007.02	-0.116333
2008.2	6.98206		2008.2	2.37286
2009.38	5.18152		2009.38	5.00739
2010.56	3.34131		2010.56	5.24005
2011.74	2.80463		2011.74	2.53943
2012.92	2.72736		2012.92	-0.110291
2014.09	1.3905		2014.09	-0.240479
2015.27	-1.75323		2015.27	1.25806
2016.45	-4.71497		2016.45	2.27582
2017.63	-4.29614		2017.63	2.06274
2018.81	-0.262512		2018.81	0.493652
2019.98	3.30768		2019.98	-2.16589
2021.16	3.24158		2021.16	-4.09875
2022.34	1.01019		2022.34	-3.55725
2023.52	-0.899841		2023.52	-1.05737
2024.69	-1.664		2024.69	1.38495
2025.87	-0.753357		2025.87	1.83191
2027.05	1.60242		2027.05	1.0802
2028.22	3.05908		2028.22	1.69208
2029.4	2.06921		2029.4	2.97992
2030.58	0.226379		2030.58	2.78723
2031.75	-0.266785		2031.75	2.47327
2032.93	0.667664		2032.93	3.42853
2034.1	1.06073		2034.1	3.43414
2035.28	-0.369141		2035.28	1.24005
2036.45	-1.9502		2036.45	-0.810059
2037.63	-1.29193		2037.63	-1.02887
2038.8	1.29291		2038.8	-0.603882
2039.98	3.14795		2039.98	-0.51947
2041.15	3.00751		2041.15	0.192932
2042.33	2.91827		2042.33	2.22089
2043.5	3.64185		2043.5	4.37677
2044.68	1.84137		2044.68	4.86377
2045.85	-2.91467		2045.85	3.50989
2047.02	-6.53363		2047.02	2.29956
2048.2	-7.07178		2048.2	2.13904
2049.37	-5.66345		2049.37	0.871948
2050.54	-2.78363		2050.54	-1.92371
2051.72	0.707947		2051.72	-2.25037
2052.89	3.10455		2052.89	1.59766
2054.06	3.53607		2054.06	5.22986
2055.23	2.92877		2055.23	5.14624
2056.41	1.97565		2056.41	3.72174
2057.58	2.8042		2057.58	4.03461
2058.75	5.12799		2058.75	4.55353
2059.92	6.28094		2059.92	2.513
2061.09	5.26544		2061.09	-0.899536
2062.26	4.24548		2062.26	-2.76202
2063.44	4.841		2063.44	-2.98138
2064.61	5.76709		2064.61	-3.12268
2065.78	5.94299		2065.78	-4.42023
2066.95	6.06989		2066.95	-5.92761
2068.12	5.6618		2068.12	-4.38025
2069.29	3.63947		2069.29	1.48676
2070.46	2.04871		2070.46	7.29926
2071.63	3.56055		2071.63	8.29688
2072.8	6.87744		2072.8	4.59406
2073.97	8.78009		2073.97	-0.132629
2075.14	7.98676		2075.14	-3.14722
2076.31	5.9657		2076.31	-3.27942
2077.48	4.9353		2077.48	-0.563782
2078.64	4.09839		2078.64	2.22437
2079.81	1.37659		2079.81	2.0011
2080.98	-1.24597		2080.98	0.122009
2082.15	-0.613342		2082.15	-0.290649
2083.32	2.10254		2083.32	0.855042
2084.49	3.93262		2084.49	2.4325
2085.65	4.00183		2085.65	5.00323
2086.82	3.07562		2086.82	8.26935
2087.99	2.63831		2087.99	8.77698
2089.16	3.65845		2089.16	5.2287
2090.32	4.52667		2090.32	1.76459
2091.49	3.03973		2091.49	1.22797
2092.66	0.57251		2092.66	2.13409
2093.82	-0.1875		2093.82	3.07642
2094.99	-0.120483		2094.99	3.21088
2096.16	-1.76788		2096.16	1.56854
2097.32	-4.87982		2097.32	-0.60083
2098.49	-6.47205		2098.49	-0.594299
2099.65	-4.40393		2099.65	1.43176
2100.82	0.261963		2100.82	2.00842
2101.98	4.44751		2101.98	-0.0988159
2103.15	6.05884		2103.15	-1.98376
2104.31	5.64282		2104.31	-1.63098
2105.48	4.55884		2105.48	0.219299
2106.64	2.63507		2106.64	1.96411
2107.81	0.371338		2107.81	1.77515
2108.97	0.517822		2108.97	-0.332092
2110.14	3.88696		2110.14	-1.81079
2111.3	7.74438		2111.3	-0.473633
2112.46	10.0268		2112.46	3.38245
2113.63	11.0757		2113.63	6.86682
2114.79	11.2535		2114.79	7.19806
2115.95	9.81036		2115.95	5.15741
2117.12	6.18384		2117.12	3.2439
2118.28	1.12396		2118.28	1.43768
2119.44	-3.29114		2119.44	-1.78741
2120.6	-4.8269		2120.6	-5.24384
2121.77	-3.45209		2121.77	-5.52545
2122.93	-1.46338		2122.93	-2.0697
2124.09	0.0767822		2124.09	1.74518
2125.25	2.26227		2125.25	2.82837
2126.41	4.60895		2126.41	1.07776
2127.58	5.16382		2127.58	-1.38281
2128.74	4.33325		2128.74	-1.94482
2129.9	3.5238		2129.9	0.625305
2131.06	2.81384		2131.06	5.07703
2132.22	2.40668		2132.22	8.09729
2133.38	2.25586		2133.38	8.04504
2134.54	1.53363		2134.54	6.9668
2135.7	0.240356		2135.7	6.39349
2136.86	-1.07654		2136.86	5.4967
2138.02	-1.76025		2138.02	4.13562
2139.18	-0.700745		2139.18	3.40375
2140.34	1.19421		2140.34	3.95715
2141.5	0.75		2141.5	4.59259
2142.66	-2.36133		2142.66	3.138
2143.82	-3.95221		2143.82	0.718323
2144.98	-1.75671		2144.98	1.05206
2146.13	1.86584		2146.13	4.0611
2147.29	4.33765		2147.29	6.33911
2148.45	5.34644		2148.45	7.26093
2149.61	5.01746		2149.61	8.20154
2150.77	3.02289		2150.77	7.8797
2151.93	0.284973		2151.93	4.49835
2153.08	-1.49268		2153.08	-0.0830688
2154.24	-2.15332		2154.24	-2.14594
2155.4	-2.02454		2155.4	-0.190186
2156.55	-0.840027		2156.55	3.06531
2157.71	0.321472		2157.71	3.24561
2158.87	0.0684814		2158.87	0.178772
2160.02	-0.239197		2160.02	-2.36951
2161.18	1.2901		2161.18	-2.80554
2162.34	2.91711		2162.34	-2.25439
2163.49	2.00122		2163.49	-0.950317
2164.65	-0.551331		2164.65	1.10669
2165.8	-1.66223		2165.8	2.60406
2166.96	0.387207		2166.96	2.74506
2168.12	4.72217		2168.12	2.2796
2169.27	8.74884		2169.27	2.36401
2170.43	10.4206		2170.43	3.24841
2171.58	10.378		2171.58	3.46405
2172.74	10.0432		2172.74	2.27661
2173.89	8.05682		2173.89	1.92047
2175.04	2.80975		2175.04	3.19269
2176.2	-3.05731		2176.2	3.24957
2177.35	-5.04407		2177.35	0.966125
2178.51	-2.24414		2178.51	-1.64178
2179.66	2.12396		2179.66	-2.83966
2180.81	4.90436		2180.81	-2.2525
2181.97	5.55042		2181.97	-1.11438
2183.12	4.76569		2183.12	-0.409546
2184.27	3.37866		2184.27	1.48724
2185.42	2.21802		2185.42	4.87305
2186.58	1.23743		2186.58	6.24817
2187.73	-0.046814		2187.73	3.98792
2188.88	-1.1651		2188.88	1.1239
2190.03	-1.33521		2190.03	0.48468
2191.19	0.00665283		2191.19	1.0708
2192.34	3.5495		2192.34	0.773438
2193.49	8.20154		2193.49	0.546509
2194.64	10.4498		2194.64	2.62524
2195.79	8.5166		2195.79	5.8858
2196.94	4.62585		2196.94	7.20471
2198.09	1.12921		2198.09	5.75568
2199.24	-2.08527		2199.24	2.57269
2200.39	-4.98877		2200.39	-1.34052
2201.55	-6.44232		2201.55	-4.48804
2202.7	-5.9444		2202.7	-5.06305
2203.85	-3.11542		2203.85	-2.60272
2205	0.62616		2205	0.916565
2206.14	3.28796		2206.14	2.55548
2207.29	3.83807		2207.29	1.72009

## Sheet: Table S4
Table S4. Whole-rock major (wt.%), trace-element (ppm) and Sr-Nd-Pb-Hf isotopic data of the ultrapotassic lavas from the western Kunlun area of NW Tibet.
Location	GPS	Age (Ma)	Sample	SiO2	TiO2	Al2O3	(Fe2O3)T	MnO	MgO	CaO	Na2O	K2O	P2O5	LOI	Total	Mg#	K2O/Na2O	Sc	Ti	V	Cr	Mn	Co	Ni	Cu	Zn	Ga	Ge	Rb	Sr	Y	Zr	Nb	Cs	Ba	La	Ce	Pr	Nd	Sm	Eu	Gd	Tb	Dy	Ho	Er	Tm	Yb	Lu
Kangxiwa	36°10'38''N 78°52'36''E	3.8	14QW100	47.767	1.923	11.998	9.026	0.13	8.406	8.169	2.325	5.41	1.401	1.851	98.406	68.4584	2.32688	18.48	11044.3	180.8	287.4	1003.8	35.72	188.6	38.64	116	18.2	4.401	259.9	1815.1	29.75	530.4	32.64	3.054	2529.6	109.1	229.1	29.36	113.4	18.29	4.483	13.28	1.458	6.489	1.062	2.41	0.309	1.891	0.274
Kangxiwa	36°10'38''N 78°52'36''E	3.8	14QW101	47.265	1.996	12.319	9.151	0.128	8.256	8.125	2.332	5.63	1.431	1.969	98.602	67.7686	2.41424	18.92	11839.2	185.6	294.8	1000.8	36.05	196.3	39.4	116.7	19.24	4.546	320.4	1909.9	31.41	555.5	38.05	3.334	2661.2	116	244.6	31.52	120.4	19.46	4.743	13.97	1.524	6.868	1.111	2.532	0.325	1.975	0.286
Kangxiwa	36°10'38''N 78°52'36''E	3.8	14QW105	47.125	1.973	12.213	9.104	0.126	8.351	8.118	2.371	5.516	1.441	2.025	98.363	68.1299	2.32644	18.11	11173.8	179.4	292.7	974.5	35.52	189.8	39.05	115.8	18.5	4.34	257.2	1865.8	30.54	542.8	33.15	3.191	2583.4	113.5	236.7	30.46	116.5	18.96	4.589	13.66	1.488	6.651	1.076	2.467	0.309	1.896	0.283
Kangxiwa	36°10'38''N 78°52'36''E	3.8	14QW106	47.409	1.984	12.196	9.16	0.129	8.304	8.11	2.313	5.642	1.406	1.829	98.482	67.8737	2.43926	18.01	11225.8	187.2	279.7	983.2	35.55	188.3	36.64	112.7	18.54	4.334	267.3	1873.9	29.97	542.5	33.14	3.239	2619.5	112.4	234.6	30.07	114.8	18.58	4.58	13.62	1.484	6.636	1.087	2.466	0.312	1.901	0.28
Kangxiwa	36°10'38''N 78°52'36''E	3.8	14QW111	47.394	1.974	12.308	9.168	0.127	8.065	8.079	2.437	5.557	1.415	1.823	98.347	67.2144	2.28026	18.55	11651.7	186.3	291.7	1011	36.28	195.1	38.06	115.8	19.08	4.57	286.9	1930	30.85	575.2	33.82	3.422	2695.3	113.7	241.1	30.72	118.9	19.29	4.711	13.95	1.517	6.735	1.102	2.542	0.319	1.958	0.287
Kangxiwa	36°10'38''N 78°52'36''E	3.8	14QW112	47.825	2.049	12.459	9.365	0.129	7.226	7.878	5.122	2.523	1.577	3.273	99.426	64.2628	0.492581	18.17	12067.5	183.1	261.3	1010.1	35.52	161.7	34.33	117.6	19.72	4.588	200.3	1941.7	32.21	613.5	36.33	4.048	2620.3	124.8	260	32.95	126.7	20.52	4.933	14.77	1.589	7.064	1.151	2.61	0.328	2.019	0.291
Kangxiwa	36°10'38''N 78°52'36''E	3.8	14QW113	47.188	1.988	12.15	9.232	0.129	7.922	8.01	3.273	3.925	1.561	2.948	98.326	66.6645	1.19921	18.1	11561.3	168.6	304.6	997.9	35.36	170.3	30.31	112.5	18.64	4.519	217.3	2186.2	30.44	552.9	32.91	3.369	2834.7	117.2	247	31.69	123.2	19.82	4.952	14.26	1.552	6.81	1.102	2.487	0.31	1.881	0.278
Kangxiwa	36°10'38''N 78°52'36''E	3.8	14QW114	46.851	2.027	12.297	9.076	0.123	8.073	7.774	2.538	5.866	1.531	2.024	98.18	67.458	2.31127	17.81	11714	188.7	283.4	993.3	34.94	166	32.1	114.5	19.18	4.569	269.1	2041.5	31.14	571.5	34.71	3.778	2760.2	122.5	261.5	32.77	126.7	20.33	4.959	14.74	1.602	6.984	1.145	2.666	0.327	1.953	0.289
Kangxiwa	36°10'38''N 78°52'36''E	3.8	14QW115	46.774	2.023	12.294	9.146	0.127	7.756	8.045	2.565	5.753	1.585	2.264	98.332	66.4014	2.24288	17.6	11658.3	179.6	278.5	955.3	37.68	164.8	32.2	114.3	19.06	4.56	275.3	2017.3	30.99	573.4	34.65	3.731	2808	119.6	250.9	32.26	122.9	20.04	4.849	14.35	1.554	6.875	1.111	2.511	0.316	1.92	0.278
Kangxiwa	36°10'38''N 78°52'36''E	3.8	14QW116	47.199	1.936	12.165	9.093	0.128	8.496	8.135	2.378	5.557	1.37	2.014	98.471	68.5286	2.33684	18.47	11360.9	181	302	1002	35.64	193	38.93	112.4	18.79	4.318	226.8	1882.1	30.23	547.4	33.14	3.284	2620.2	110.9	231.7	29.56	113.4	18.62	4.557	13.27	1.466	6.567	1.069	2.457	0.307	1.906	0.279
Kangxiwa	36°10'38''N 78°52'36''E	3.8	14QW117	47.32	1.959	12.242	9.164	0.129	7.943	8.121	2.423	5.673	1.398	2.088	98.46	66.8873	2.34131	18.57	11471.5	201.9	297.4	1026.8	36.68	199.6	39.76	114.3	18.87	4.451	227.3	1886.2	30.73	551.8	33.19	3.385	2638.5	114.5	240.8	30.82	118.9	19.04	4.653	13.86	1.505	6.786	1.101	2.495	0.322	1.979	0.289
Kangxiwa	36°10'38''N 78°52'36''E	3.8	14QW118	47.175	1.97	12.309	9.16	0.127	8.3	8.068	2.431	5.511	1.376	2.063	98.49	67.8632	2.26697	18.66	11732.8	183.7	300.3	1006.9	36.73	199.3	40.49	114.2	18.96	4.442	247.2	1923.6	30.49	544.1	33.45	3.488	2691.9	113.5	237.2	30.54	116.6	19	4.649	13.84	1.5	6.71	1.081	2.502	0.318	1.913	0.286
Dahongliutan	35°53'38''N 79°20'41''E	3.8	14QW119	57.787	1.393	13.949	6.37	0.094	4.148	5.493	3.866	5.053	0.659	0.361	99.173	60.2791	1.30704	9.987	8062	99.19	76.36	715.3	34.37	64.52	23.37	100.8	21.76	3.513	202.3	1559.7	19.87	390	34.64	4.781	2270.5	128.1	241.3	27.84	97.78	14.25	3.458	9.994	0.995	4.353	0.701	1.689	0.209	1.271	0.185
Dahongliutan	35°53'38''N 79°20'42''E	3.8	14QW120	57.621	1.363	13.943	6.282	0.091	4.057	5.554	3.884	5.091	0.725	0.259	98.87	60.0809	1.31076	10.1	8126.6	101	78.34	722.5	30.1	64.82	23.94	104.7	22.06	3.675	204.6	1594.8	20.64	392.6	34.94	4.93	2314.7	141.5	261.6	30.47	104.8	15.18	3.598	10.52	1.048	4.551	0.738	1.742	0.216	1.328	0.193
Dahongliutan	35°53'38''N 79°20'43''E	3.8	14QW121	58.074	1.356	13.797	6.192	0.087	3.894	5.531	3.857	5.003	0.71	0.296	98.797	59.4418	1.29712	9.642	7908.7	100.7	70.61	672.6	41.84	59.34	12.05	106.9	22.03	3.817	204	1512.9	21.13	420	35.08	4.498	2176.1	141.4	265.8	30.82	107.3	15.27	3.511	10.63	1.056	4.606	0.733	1.753	0.22	1.337	0.198
Dahongliutan	35°53'38''N 79°20'44''E	3.8	14QW122	57.085	1.441	13.833	6.594	0.091	4.321	5.818	3.808	4.916	0.792	0.098	98.797	60.4299	1.29097	10.72	8635.3	109.7	80.56	721.3	34.39	68.99	12.99	100	22.25	3.879	197.4	1573.8	22.12	422.6	36.42	5.616	2228.4	147.8	277	32.34	112.7	16.01	3.755	11.23	1.101	4.858	0.768	1.837	0.228	1.394	0.201
Dahongliutan	35°53'38''N 79°20'45''E	3.8	14QW123	57.853	1.39	13.928	6.311	0.089	4.076	5.535	3.853	4.967	0.731	0.197	98.93	60.0825	1.28913	9.968	8238.8	106.9	78.46	692.6	37.83	63.48	16.39	98.77	22.11	3.778	204.8	1552.7	21.46	404.1	35.49	5.141	2227.7	141.9	267.8	31.35	108.8	15.78	3.65	10.91	1.083	4.759	0.76	1.809	0.226	1.367	0.199
Dahongliutan	35°53'38''N 79°20'46''E	3.8	14QW124	56.408	1.446	13.912	6.758	0.097	4.552	5.992	3.88	4.983	0.781	0.236	99.045	61.0859	1.28428	10.72	8615.7	114.1	88.37	755.2	33.13	75.53	12.18	167.9	21.65	3.745	193.1	1607.5	20.78	377.5	36.04	5.999	2305.9	138.3	259	30.44	107.3	15.33	3.688	10.87	1.07	4.654	0.746	1.78	0.219	1.339	0.192
Dahongliutan	35°53'38''N 79°20'47''E	3.8	14QW125	57.355	1.421	13.821	6.5	0.094	4.25	5.799	3.861	4.965	0.813	0.179	99.058	60.377	1.28594	10.43	8545.2	107.4	77.22	740.5	32.98	65.92	16.76	119.7	22.3	3.911	205.2	1560.3	22.26	415.9	36.12	10.93	2201.8	154.7	286.9	33.39	116.6	16.42	3.777	11.36	1.135	4.898	0.794	1.85	0.231	1.401	0.205
Dahongliutan	35°53'38''N 79°20'48''E	3.8	14QW126	57.215	1.423	13.811	6.545	0.092	4.237	5.718	3.83	4.915	0.754	0.218	98.758	60.1384	1.28329	10.51	8619.3	112.4	80.3	727.6	45.27	66.33	12.66	101.8	22.38	3.847	199.6	1558.1	21.9	426.9	36.67	6.381	2195.8	142.5	271	31.47	109.9	15.71	3.639	10.92	1.086	4.744	0.762	1.805	0.225	1.366	0.198
Dahongliutan	35°53'38''N 79°20'49''E	3.8	14QW127	57.825	1.402	13.789	6.398	0.09	4.104	5.646	3.849	4.956	0.745	0.277	99.081	59.9182	1.28761	10.06	8214	106.8	76.84	704.5	34.4	61.91	9.661	101	22.21	3.838	202.8	1537.1	21.72	420.4	35.29	5.95	2187	148.6	278	32.55	112.4	16.09	3.679	11.13	1.089	4.837	0.779	1.83	0.226	1.392	0.204
Dahongliutan	35°53'38''N 79°20'50''E	3.8	14QW128	57.499	1.425	13.861	6.481	0.09	4.182	5.727	3.837	4.937	0.749	0.238	99.026	60.0608	1.28668	11.15	8536.8	111.3	80.14	712	39.56	63.79	14.01	98.91	22.6	3.93	212.8	1579.2	22.59	415.3	36.9	7.096	2212.9	153.8	289.5	33.92	121	16.57	3.673	11.49	1.136	4.946	0.797	1.921	0.239	1.478	0.206
Dahongliutan	35°53'38''N 79°20'51''E	3.8	14QW149	53.15	1.793	15.121	8.045	0.098	3.578	6.295	4.066	4.803	1.105	0.714	98.768	50.8958	1.18126	10.23	11244.9	134	50.82	812.5	28.35	41.72	20.45	132.6	24.32	4.717	156.5	1907.1	26.99	536.5	49.76	2.399	2666.1	186.8	354.2	41.7	148.7	20.3	4.589	14.22	1.369	5.921	0.935	2.221	0.259	1.551	0.225
Quanshuigou	35°27'12''N 80°10'36''E	5.3-6.0	14QW150	53.246	1.794	15.099	7.987	0.099	3.633	6.233	4.102	4.828	1.1	0.984	99.105	51.4577	1.17699	10.39	11479.1	133.1	54.17	829.4	28.67	42.78	20.51	134.1	24.52	4.89	159.9	1948.5	27.1	547.3	50.58	2.541	2710.1	192.7	364.9	42.31	150.6	20.73	4.633	14.16	1.391	5.953	0.953	2.235	0.263	1.588	0.228
Quanshuigou	35°27'12''N 80°10'36''E	5.3-6.0	14QW152	51.661	2.09	15.481	9.191	0.093	3.38	6.498	3.648	4.714	1.223	0.755	98.734	46.151	1.29221	11.76	13048.3	161.4	57.53	783.5	29.21	50.63	25.87	137.5	24.85	4.966	144.7	2035.1	26.64	414.6	46.77	1.709	2856.7	173.4	336.2	39.91	145.3	20.21	4.739	13.99	1.369	5.971	0.957	2.195	0.257	1.523	0.218
Quanshuigou	35°27'12''N 80°10'36''E	5.3-6.0	14QW153	52.674	1.785	15.087	7.899	0.099	3.975	5.946	4.084	4.826	1.019	1.513	98.907	53.9759	1.18168	9.572	10931.3	129.9	47.67	803.8	37.05	42.11	19.99	130.4	23.62	4.42	163.9	1890.8	25.39	537	49.67	2.261	2622.9	176.8	334.9	39.61	140.4	19.38	4.426	13.45	1.31	5.722	0.906	2.107	0.251	1.513	0.216
Quanshuigou	35°27'12''N 80°10'36''E	5.3-6.0	14QW154	53.057	1.854	15.272	8.238	0.1	3.78	6.072	4.091	4.876	1.081	0.636	99.057	51.6756	1.19188	9.688	11501.7	140	51.38	833.6	29.06	46.53	23.77	136.5	24.39	4.648	174.4	1975.3	26.36	544.6	50.61	2.945	2751.7	183.5	347.3	41.09	146.6	20.36	4.626	13.91	1.354	5.9	0.944	2.18	0.264	1.573	0.224
Quanshuigou	35°27'12''N 80°10'36''E	5.3-6.0	14QW155	51.714	1.561	13.218	7.89	0.113	6.594	7.157	3.277	4.431	0.775	2.888	99.618	66.0752	1.35215	15.22	9734.2	142.2	218.9	914.3	35.16	110.1	26.28	108.3	20.93	3.701	208.7	1201.5	23.34	429.7	40.2	7.86	1549.2	109	208.1	24.53	88.35	13.36	3.181	10	1.055	4.879	0.842	1.984	0.262	1.624	0.243
Quanshuigou	35°27'12''N 80°10'36''E	5.3-6.0	14QW156	51.407	1.942	15.048	8.612	0.106	4.466	6.755	3.887	4.625	1.209	0.817	98.874	54.7214	1.18986	11.06	12305	158	58.96	886.6	35.22	50.42	23.58	134.7	24.06	4.726	144.3	2009.1	26.74	437.4	45.74	2.081	2834.1	183.6	353	41.82	150.1	20.75	4.738	14.47	1.4	6.12	0.96	2.262	0.259	1.528	0.221
Quanshuigou	35°27'12''N 80°10'36''E	5.3-6.0	14QW157-1	52.336	1.99	15.459	8.737	0.097	3.381	6.277	3.952	4.729	1.107	0.859	98.924	47.4195	1.19661	10.83	12513.3	163.1	47.01	799.8	48.13	49.92	23.61	138.9	24.57	4.569	151	2029.8	26.06	503.9	50.03	2.199	2812.7	172.7	328.1	38.98	138.8	19.41	4.589	13.52	1.309	5.765	0.92	2.132	0.257	1.529	0.22
Quanshuigou	35°27'12''N 80°10'36''E	5.3-6.0	14QW157-2	52.179	1.975	15.371	8.743	0.094	3.507	6.401	3.869	4.712	1.159	0.665	98.675	48.3154	1.21789	11.14	12383.1	163	59.73	777.2	33.09	52.2	24.69	138.6	24.32	4.805	150.9	1982.6	26.72	503.8	49.42	2.166	2818.4	180.7	342.5	40.61	144.7	20.17	4.678	13.84	1.353	6.004	0.946	2.194	0.263	1.523	0.224
Quanshuigou	35°27'12''N 80°10'36''E	5.3-6.0	14QW158	51.072	1.906	14.907	8.458	0.105	3.811	6.878	3.848	4.696	1.171	1.903	98.755	51.2213	1.22037	10.93	11934.3	173.8	57.86	879.1	32.62	49.78	24.4	135.1	23.83	4.52	157	2020.4	26.48	500.2	48.3	2.602	2679	175.8	337.9	39.68	143	19.87	4.544	13.78	1.338	5.878	0.931	2.158	0.26	1.531	0.222
Quanshuigou	35°27'12''N 80°10'36''E	5.3-6.0	14QW159	56.922	1.044	16.423	5.59	0.091	2.651	5.043	4.361	5.487	0.625	0.754	98.991	52.4989	1.2582	7.425	6576.5	90.01	44.72	757.9	22.54	43.12	13.02	119	24.19	3.798	146.9	2015.6	29.66	520.8	55.65	8.265	1890.3	161.4	301.5	34.89	118.8	16.9	3.807	12.31	1.265	5.961	1.005	2.465	0.339	2.14	0.319
Quanshuigou	35°27'12''N 80°10'36''E	5.3-6.0	14QW160	55.503	1.599	14.846	7.037	0.092	3.657	6.27	4.138	4.767	0.793	0.308	99.01	54.774	1.15201	9.069	10018.2	104.4	51.72	744.2	37.65	47.87	16.66	90.87	24.14	3.73	169.3	1660.6	22.39	495.4	53.98	1.882	2266.4	160.2	280.3	31.92	108.9	14.89	3.557	10.87	1.062	4.796	0.779	1.879	0.234	1.458	0.212
Quanshuigou	35°27'12''N 80°10'36''E	5.3-6.0	14QW161	54.897	1.597	14.744	7.034	0.091	3.61	6.728	4.075	4.756	0.939	0.595	99.066	54.464	1.16712	9.132	10095.8	112.8	52.86	747.5	26.29	47.19	17.03	121.1	24	3.918	170.8	1659.4	23.29	501	54.37	2.72	2275.9	163.1	300.3	34.22	116	15.98	3.641	11.51	1.155	5.074	0.826	2.006	0.249	1.561	0.23
Quanshuigou	35°27'12''N 80°10'36''E	5.3-6.0	14QW162	51.936	1.839	15.155	8.301	0.183	3.126	6.409	3.879	4.347	1.2	2.435	98.81	46.7412	1.12065	11.4	11668.3	127.4	67.72	1534.4	101.9	210	24.64	279.8	24.55	5.665	130.7	1821.5	43.96	504.9	50.48	1.506	2623.4	194.5	419.8	51.38	191.9	26.29	5.14	18.8	1.904	8.774	1.45	3.51	0.454	2.855	0.421
Quanshuigou	35°27'12''N 80°10'36''E	5.3-6.0	14QW163	53.446	1.901	14.752	7.232	0.08	3.324	6.723	3.91	4.41	1.135	2.208	99.121	51.7177	1.12788	11.62	11896.5	124.8	107.8	668.4	31.82	67.77	23.44	139.5	23.87	3.86	130.5	1867.8	22.86	502.3	50.47	2.058	2650	135.2	254.7	30.85	108.5	16.09	3.994	11.01	1.159	5.094	0.824	1.948	0.239	1.492	0.211
Quanshuigou	35°27'12''N 80°10'36''E	5.3-6.0	14QW164	52.581	1.867	15.168	7.191	0.106	3.079	6.928	3.986	4.555	1.162	1.866	98.489	49.9464	1.14275	9.844	12030.1	105.4	43.35	889.2	38.1	42.53	22.05	117.5	24.98	4.234	145.4	1913.8	25.85	523.5	53.72	4.137	2794	172.9	323.5	37.87	132	18.08	4.092	12.89	1.274	5.502	0.899	2.105	0.256	1.576	0.229
Quanshuigou	35°27'12''N 80°10'36''E	5.3-6.0	14QW165	52.24	1.729	14.866	8.638	0.14	3.079	7.252	3.389	4.295	1.067	2.124	98.819	45.3762	1.26734	13.24	11115.5	137.9	125.6	1169.3	41.47	87.98	29.12	148.3	23.57	4.154	134.8	1785.2	26.35	395.8	47.33	8.57	2306.1	142.4	274.2	32.49	115	16.79	3.909	12.13	1.214	5.543	0.936	2.185	0.279	1.726	0.25
Quanshuigou	35°27'12''N 80°10'36''E	5.3-6.0	14QW172	52.259	1.637	14.575	8.594	0.12	6.014	7.166	3.734	3.625	0.805	0.685	99.214	61.9896	0.970809	14.2	10360.3	142	109.2	977.4	35.71	88.22	25.77	115.7	22.11	3.798	120.8	1369.1	25.17	388.2	41.38	4.884	1683.7	110.2	211.3	25.29	89.68	13.68	3.293	10.3	1.125	5.253	0.91	2.102	0.277	1.723	0.255
Quanshuigou	35°27'12''N 80°10'36''E	5.3-6.0	14QW173	51.489	1.677	14.668	8.694	0.121	5.526	7.554	3.536	4.147	0.84	0.64	98.892	59.6984	1.17279	14.31	10729.8	146.9	114.3	1003.8	38.75	88.71	25.43	113.6	22.65	3.906	144.7	1431.1	25.5	391.3	42.1	3.307	1756	113.5	217.3	25.98	91.74	14.17	3.323	10.43	1.134	5.352	0.897	2.132	0.284	1.722	0.256
Quanshuigou	35°27'12''N 80°10'36''E	5.3-6.0	14QW174	56.931	1.305	14.307	6.144	0.082	3.268	6.183	3.939	4.684	0.796	1.167	98.806	55.3491	1.18913	9.583	8315.8	98.43	71.85	679.3	30.28	60.01	15.86	104.2	23.89	3.58	188.5	1431.3	22.74	400.8	48.32	6.276	1937.9	147.8	267.7	30.15	101.8	14.34	3.059	10.22	1.031	4.659	0.78	1.918	0.25	1.565	0.232
Quanshuigou	35°27'12''N 80°10'36''E	5.3-6.0	14QW175	56.516	1.327	14.129	6.381	0.089	3.642	6.315	3.822	4.562	0.833	1.26	98.876	57.0843	1.19362	9.858	8609.6	102.2	79.24	756.8	27.9	67.82	20.67	109.5	23.96	3.837	187.1	1464.1	23.62	416	49.47	7.926	1972.5	154.1	277.9	31.48	105.9	14.83	3.179	10.71	1.086	4.885	0.819	1.955	0.264	1.607	0.243
Quanshuigou	35°27'12''N 80°10'36''E	5.3-6.0	14QW176	61.453	1.068	14.532	5.118	0.072	2.505	4.28	4.236	5.124	0.56	0.134	99.082	53.2855	1.20963	6.81	6856.5	75.41	29.51	596.1	37.69	35.42	10.38	73.64	25.13	3.185	246.5	1206.5	21.08	343.7	52.78	5.725	1605.5	137.4	242.9	26.44	86.64	12.01	2.537	8.867	0.888	4.213	0.705	1.769	0.239	1.539	0.233
Quanshuigou	35°27'12''N 80°10'36''E	5.3-6.0	14QW177	59.75	1.168	14.348	5.556	0.076	2.998	5.118	4.093	4.913	0.661	0.362	99.043	55.7038	1.20034	8.217	7514.8	83.04	48.29	628.3	26.06	47.03	14.53	76.51	24.44	3.377	224.9	1285.1	21.71	393.9	50.92	3.994	1711.5	142.8	253.6	28.47	93.74	12.86	2.842	9.515	0.958	4.419	0.748	1.835	0.247	1.562	0.241
Quanshuigou	35°27'12''N 80°10'36''E	5.3-6.0	14QW178	57.493	1.293	14.274	6.128	0.082	3.353	5.926	3.963	4.696	0.746	1.067	99.021	56.047	1.18496	9.045	8303	96.35	60.37	687.9	32.31	56.15	16.89	104.2	24.14	3.629	204.6	1416.2	22.61	421.4	50.69	8.666	1924.5	147.6	265.8	29.98	98.8	14.02	3.093	10.07	1.034	4.675	0.78	1.9	0.252	1.602	0.242
Quanshuigou	35°27'12''N 80°10'36''E	5.3-6.0	14QW179	56.493	1.255	13.975	5.977	0.084	3.73	6.424	3.877	4.569	0.773	1.72	98.877	59.2563	1.17849	9.2	8041.5	87.7	61.19	693.8	25.92	55.06	21.06	99.86	23.71	3.487	192.3	1430.2	22.68	410.4	48.8	7.612	1892.6	150.4	267.3	30.51	101.2	14.19	3.075	10.07	1.034	4.67	0.776	1.915	0.254	1.603	0.239
Keliya	35°30'34''N 81°50'47'E	0.56	14QW42	57.802	2.268	14.548	8.032	0.111	2.598	4.915	3.346	4.179	1.099	0.343	99.241	42.9814	1.24895	10.81	13638.2	100.8	16.45	869.2	22.86	6.94	15.3	150.6	25.02	4.883	146.2	1000.2	32.6	692.2	68.56	1.968	2111.2	190.1	387.8	45.91	165.3	22.84	4.282	15.7	1.642	7.482	1.194	2.877	0.351	2.146	0.302
Keliya	35°30'34''N 81°50'47'E	0.56	14QW43	57.794	2.252	14.467	7.985	0.11	2.58	5.002	3.289	4.198	1.103	0.516	99.296	42.9549	1.27638	10.95	13524.6	100.3	15.67	876.9	30.88	5.937	15.44	150.6	24.87	4.809	148	1017.9	32.07	693.1	67.48	2.022	2130	191.8	383.3	45.04	162.2	22.26	4.293	15.22	1.607	7.355	1.151	2.743	0.346	2.081	0.296
Keliya	35°30'34''N 81°50'47'E	0.56	14QW44	57.811	2.255	14.512	7.968	0.109	2.533	4.922	3.337	4.196	1.096	0.376	99.115	42.5571	1.25742	10.98	13961.6	105.6	18.11	899.8	25.96	6.441	15.42	157.1	26.12	5.013	152.9	1052.4	32.98	726.7	70.31	2.062	2215.8	193.5	392.9	46.77	166.1	22.26	4.358	15.8	1.602	7.418	1.198	2.811	0.348	2.113	0.301
Keliya	35°30'34''N 81°50'47'E	0.56	14QW45	58.24	2.227	14.672	7.933	0.111	2.602	4.771	3.328	4.257	1.08	0	99.221	43.3234	1.27915	10.48	13505.3	101	17.37	881.3	23.49	7.361	12.89	148.2	25.28	4.621	149.9	1015.4	29.84	693.3	66.04	1.785	2119.8	181.2	358.9	42.79	153.3	20.98	4.183	14.2	1.5	6.696	1.106	2.588	0.32	1.958	0.277
Keliya	35°30'34''N 81°50'47'E	0.56	14QW45-2	58.118	2.216	14.667	7.926	0.108	2.645	4.847	3.301	4.248	1.077	0	99.153	43.748	1.28688	10.9	13822	100.3	16.31	894.6	19.89	6.563	13.33	149.7	25.44	4.823	152.2	1029.3	29.95	696.2	67.52	1.819	2113.6	183.2	363.3	43.52	154.5	21.18	4.296	14.47	1.526	6.991	1.117	2.667	0.333	2	0.289
Keliya	35°30'34''N 81°50'47'E	0.56	14QW46	58.446	2.257	14.689	7.999	0.109	2.588	4.782	3.287	4.257	1.077	0	99.491	42.9878	1.2951	10.71	13477.8	102.4	17.03	871.8	29.48	6.502	12.52	149.3	25.15	4.627	151	1022.7	29.63	699.3	67.2	1.74	2161.2	181	360.6	42.89	153	20.85	4.171	14.19	1.494	6.741	1.096	2.598	0.316	1.935	0.276
Keliya	35°30'34''N 81°50'47'E	0.56	14QW47	58.24	2.212	14.692	7.928	0.108	2.53	4.869	3.278	4.212	1.072	0	99.141	42.6511	1.28493	10.68	13211	97.74	16.42	854.1	29.22	6.632	16.66	147.4	24.97	4.646	148.9	1022	30.24	690.1	65.75	1.803	2104.3	178.3	355.8	42.56	154.7	20.67	4.223	14.59	1.492	6.917	1.125	2.608	0.325	2.026	0.287
Keliya	35°30'34''N 81°50'47'E	0.56	14QW48	58.369	2.22	14.657	7.971	0.109	2.525	4.776	3.265	4.224	1.029	0	99.145	42.4705	1.29372	10.86	13424.2	103.1	16.6	871.6	25.75	6.59	13.93	148.9	25.38	4.613	151.4	1029.2	29.13	697.2	66.98	1.689	2145.8	168.1	337.2	40.57	143.3	19.87	4.149	13.66	1.441	6.504	1.073	2.496	0.319	1.911	0.277
Keliya	35°30'34''N 81°50'47'E	0.56	14QW51	58.376	2.214	14.656	7.886	0.108	2.531	4.799	3.325	4.256	1.02	0	99.171	42.7908	1.28	9.987	12688.7	99.93	17.42	825.9	29.84	6.86	12.68	149.2	24.85	4.673	143.9	1003.8	28.32	693.9	63.24	1.97	2179.4	155	309.8	36.72	131	18.79	4.094	13.12	1.384	6.157	1.013	2.394	0.302	1.817	0.265
Keliya	35°30'34''N 81°50'47'E	0.56	14QW52-1	58.041	2.217	14.52	7.92	0.109	2.543	4.836	3.33	4.183	1.034	0.436	99.169	42.8013	1.25616	9.734	12385	100.5	17.18	810.6	44.67	7.368	15.7	149.4	24.47	4.761	139.5	985.3	29.43	674.1	61.75	2.031	2145.6	166.1	330.3	39.02	139.7	19.81	4.058	14.19	1.46	6.583	1.087	2.521	0.318	1.917	0.276
Keliya	35°30'34''N 81°50'47'E	0.56	14QW52-2	57.906	2.202	14.651	7.989	0.112	2.556	4.848	3.283	4.168	1.021	0.361	99.097	42.7138	1.26957	10.17	12259.2	96.44	16.69	822.7	31.06	6.846	15.66	146	24.02	4.786	136.7	964.6	29.91	668.3	60.38	1.985	2084.1	164.7	326.8	38.77	139.7	19.59	4.038	13.87	1.443	6.607	1.091	2.527	0.315	1.913	0.28
The data source are from Wang et al. (2023). Note that these samples have high Nb/Ta ratios (average of 21) compared with MORB and OIB (average of 16), supporting their derivation from a mantle source affected by carbonatite metasomatism (Bragagni et al., 2022).
Bragagni, A., Mastroianni, F., Münker, C., Conticelli, S., and Avanzinelli, R., 2022, A carbon-rich lithospheric mantle as a source for the large CO2 emissions of Etna volcano (Italy): Geology, v. 50, p. 486-490, https://doi.org/10.1130/g49510.1.
Wang, J., Wang, Q., Ma, L., Hu, W.-L., Wang, J., Belousova, E., and Tang, G.-J., 2023, Rapid Recycling of Subducted Sediments in the Subcontinental Lithospheric Mantle: Journal of Petrology, v. 64, p. egad056, https://doi.org/10.1093/petrology/egad056.
[truncated: 22 more columns]

## Sheet: Table S5
Table S5. Sr isotopes and trace element compositions clinopyroxenes in the Kangxiwa mantle xenoliths.
Analysis spot	87Sr/86Sr	2SE	Li	Be	Sc	Ti	V	Cr	Zn	Co	Ni	Cu	Zn	Ga	Rb	Sr	Y	Zr	Nb	Sn	Ba	La	Ce	Pr	Nd	Sm	Eu	Gd	Tb	Dy	Ho	Er	Tm	Yb	Lu	Hf	Ta	Pb	Th	U
KXW-X8-1	0.710241	0.000291615	9.12908	1.03396	3.78418	3876.12	71.7707	107.294	79.6393	4.23104	25.5063	10.0072	79.6393	10.3399	3.56447	101.326	6.46323	107.465	0.771122	4.08373	8.01656	13.8003	38.8358	5.03644	22.3554	4.16514	0.880059	2.73215	0.336176	1.55607	0.241008	0.519005	0.0544128	0.374362	0.0477825	2.89758	0.223191	1.61749	0.880482	0.121666
KXW-X8-2	0.710673	0.000318532	8.82071	1.68638	3.54503	3924.15	70.7776	105.731	83.5458	3.99648	21.1199	0.692775	83.5458	10.8082	0.188577	98.8039	6.57573	105.327	1.12422	3.86699	6.25048	13.3848	38.5397	4.95003	21.6543	3.86943	0.916982	2.63915	0.336757	1.56705	0.238253	0.50632	0.0622324	0.377449	0.0433426	2.70058	0.324258	1.60005	1.09615	0.159364
KXW-X8-3	0.710392	0.000262539	8.87976	1.50856	3.63621	3611.89	65.4464	104.845	83.3093	3.94214	20.6695	0.580344	83.3093	10.2448	0.194963	101.78	6.33223	100.593	1.14677	3.77698	9.98823	14.1731	39.2943	4.96324	21.7187	4.11611	0.844991	2.73655	0.332186	1.52484	0.237022	0.513756	0.0661671	0.34992	0.042383	2.59377	0.297271	1.71355	1.12863	0.162232
KXW-X8-4	0.711333	0.000358705	8.91953	1.38952	3.61776	3189.74	54.7352	125.718	83.681	4.02754	20.0604	0.473617	83.681	9.79802	0.0208352	96.0889	6.14214	93.531	0.999029	3.77438	0.709095	12.3386	36.4546	4.62467	20.47	3.76496	0.861903	2.67043	0.298009	1.45255	0.238997	0.511162	0.055516	0.341445	0.0428051	2.26172	0.27784	1.56005	0.975513	0.144764
KXW-X8-5	0.710568	0.000265841	9.14169	1.27986	3.61287	3396.41	62.9116	134.111	81.7329	3.88662	21.7269	1.39764	81.7329	9.80715	0.0844939	94.1569	6.01555	96.9836	0.96716	3.82793	0.162196	12.1199	36.5406	4.67893	20.275	3.89635	0.807155	2.58106	0.313694	1.54028	0.235725	0.478026	0.0505746	0.359253	0.0391339	2.46947	0.27474	1.55735	0.969935	0.137539
KXW-X8-6			9.31698	0.981394	17.9078	8397.35	127.388	184.123	48.1597	20.8162	109.486	4.79543	48.1597	8.02583	190.07	274.167	13.4414	146.682	3.61611	3.7158	6.99101	29.6475	69.647	8.8717	41.9634	8.3671	2.15388	5.85192	0.664669	3.20877	0.513921	1.18859	0.136817	0.857158	0.110764	3.98734	0.240735	1.52952	3.23703	0.411632
KXW-X8-7			19.4248	0.838669	3.83175	3765.03	71.766	173.317	59.1487	18.5691	52.6923	8.07664	59.1487	9.17697	22.9319	107.384	6.5318	102.071	0.367433	3.59168	17.2632	11.9038	36.0152	4.70455	22.2034	4.06712	0.87416	2.67249	0.327916	1.59005	0.242356	0.496961	0.0610914	0.372725	0.0488621	2.60704	0.127335	0.996124	1.27228	0.138522
KXW-X8-8			8.98554	1.75561	3.77756	4056.39	73.5041	96.6112	81.4199	4.12567	19.9029	0.43469	81.4199	10.7348	0.0365724	93.9804	6.68633	108.877	1.13346	3.93733	0.101359	12.6145	37.7522	4.98774	22.2835	3.92195	0.875173	2.66073	0.341379	1.59289	0.228273	0.523543	0.0619561	0.419308	0.0412073	2.85211	0.335144	1.59417	1.04173	0.140343
KXW-X8-9			12.1529	2.04634	2.56401	3146.14	55.1407	736.331	59.8565	3.10822	38.4937	19.3006	59.8565	9.18537	35.7547	135.431	5.56569	116.005	1.96227	530.502	100.765	18.2095	38.5964	4.50228	18.6277	3.36638	0.702988	2.25623	0.239297	1.26984	0.184398	0.427364	0.0433057	0.310389	0.0422301	2.34287	0.463924	1.34266	2.56306	0.66932
KXW-X8-10			11.558	1.23234	3.75285	3877.58	75.7597	108.22	83.3577	4.00823	21.2485	1.19401	83.3577	10.5973	0.296787	93.9996	6.54754	103.574	1.08509	5.70386	2.93852	12.2834	36.5304	4.74873	21.5121	3.80561	0.858498	2.77775	0.308479	1.56414	0.217611	0.516728	0.0607576	0.339031	0.0444091	2.8988	0.30764	1.62309	0.971192	0.149196
KXW-X6-1	0.710149	0.000354247	9.57964	1.45261	3.61245	3943.52	73.8386	97.4764	83.7079	3.93775	19.4864	0.449295	83.7079	10.9495	0.0162479	90.5229	6.38038	104.137	1.05315	3.64186	0.04156	12.5033	37.1308	4.80373	21.4314	3.87505	0.856043	2.73895	0.320544	1.51402	0.230443	0.518816	0.0631808	0.339022	0.0441545	2.71885	0.300009	1.53996	1.04074	0.132101
KXW-X6-2	0.710109	0.000321746	10.0241	1.3698	3.55182	3709.09	72.5191	107.585	83.2229	4.07825	20.4226	0.441257	83.2229	10.4089	0.121434	92.7615	6.29059	99.154	1.05496	3.5441	3.91029	12.019	35.9515	4.6572	20.751	3.84983	0.835494	2.72229	0.296637	1.45771	0.22728	0.499756	0.0546551	0.326164	0.0428461	2.58718	0.293149	1.63999	1.04345	0.126223
KXW-X6-3	0.710337	7.97135e-05	9.53498	1.6597	3.65252	3794.26	73.1003	88.7036	81.0499	3.98894	21.0941	0.59298	81.0499	10.7568	0.0163684	91.596	6.1771	102.393	1.06796	3.46929	0.137325	12.1497	36.391	4.66421	20.9083	3.79714	0.824532	2.65489	0.305366	1.53943	0.228442	0.511714	0.0551508	0.329336	0.0403364	2.66093	0.292328	1.44992	1.02867	0.128374
KXW-X6-4	0.710624	0.000333849	9.67388	1.17096	3.67026	3867.26	70.9902	89.0993	85.034	3.81691	21.0646	0.533719	85.034	10.8196	0.0574351	91.2893	6.25191	102.756	1.07154	3.3507	0.05622	12.4404	37.0055	4.72336	21.3594	3.80995	0.885518	2.71372	0.307892	1.48417	0.222337	0.476503	0.0624627	0.365041	0.0396529	2.71357	0.306861	1.5225	1.08254	0.136059
KXW-X6-5	0.710355	0.000301329	8.92467	1.18639	3.71402	3849.62	73.2902	92.5162	81.4626	3.99729	19.41	0.55444	81.4626	10.5804	bdl	89.9985	6.17951	103.235	1.06403	4.0142	0.248762	12.3096	37.2012	4.71763	21.444	3.91957	0.861554	2.71748	0.305571	1.51245	0.218032	0.496682	0.0554072	0.348887	0.0372966	2.74654	0.304579	1.48053	1.02745	0.13955
KXW-X6-6			11.0605	1.34157	3.64626	3882.48	70.736	97.9627	83.0047	3.83529	22.1249	1.33506	83.0047	10.5501	0.153003	91.6994	6.14904	107.376	1.17267	3.76259	0.352605	12.3159	37.3467	4.75512	21.2418	3.87959	0.861087	2.68782	0.31468	1.47829	0.235015	0.560186	0.0614933	0.351837	0.0424319	2.65055	0.332113	1.43244	1.11912	0.145594
KXW-X6-7			9.56727	1.35991	3.76719	4029.28	75.8392	99.5643	82.3553	4.06395	20.1933	0.502481	82.3553	10.9201	0.0108623	92.6777	6.5422	106.011	1.06972	3.59171	0.0146094	12.3321	36.8276	4.87714	21.4283	4.02463	0.903348	2.72595	0.306565	1.53263	0.241463	0.511287	0.063232	0.373528	0.0487783	2.79418	0.2904	1.56589	1.02388	0.131706
KXW-X6-8			9.03115	1.57071	3.71112	4013.66	76.163	106.066	84.1512	3.9935	19.6242	0.541778	84.1512	11.0525	0.0179836	92.2731	6.44671	105.177	1.12944	3.67719	0.0314454	12.2874	37.4961	4.8487	21.779	4.26894	0.891431	2.67047	0.316518	1.53113	0.219279	0.509471	0.0552181	0.346461	0.047483	2.81297	0.296765	1.48348	1.07485	0.123866
KXW-X6-9			8.93582	1.11401	3.78347	3982.37	78.1677	102.352	85.1736	74.758	72.0811	4.65257	85.1736	10.7641	0.153983	97.8704	6.45053	107.194	1.1402	3.78441	6.51936	13.5708	39.3466	5.04369	22.5947	4.01255	0.951023	2.7528	0.316484	1.60705	0.230302	0.507582	0.0575211	0.358174	0.0476574	2.87015	0.310583	3.7641	1.21026	0.214801
KXW-X6-10			9.07176	1.1893	3.69576	3760.3	74.279	97.0827	84.9661	4.07291	20.1204	0.424882	84.9661	10.4303	0.167654	98.3685	6.10216	99.3616	1.07868	3.61592	8.51617	13.1353	37.7633	4.81597	20.9731	3.77727	0.85399	2.79501	0.304353	1.45871	0.224127	0.473377	0.054606	0.333975	0.0394036	2.80388	0.274828	1.70613	1.06507	0.162046
KXW-X6-11			7.73723	1.54102	3.59942	3648.09	70.8902	110.474	80.6678	4.02666	22.6723	1.07821	80.6678	10.1725	0.12069	111.31	6.3818	95.1045	0.706142	3.03535	0.149798	13.0731	38.4507	4.87743	21.6242	3.81787	0.907281	2.75948	0.318837	1.5365	0.245451	0.493777	0.0547148	0.351733	0.042316	2.54735	0.200321	1.20851	0.776241	0.0992772
KXW-X6-12			8.81949	1.4015	3.58026	3858.74	70.5494	105.353	83.8111	3.9932	19.4754	0.517509	83.8111	10.4571	bdl	90.6531	6.323	102.658	1.06942	3.68954	0.0681262	12.0619	36.2639	4.72558	21.168	3.85424	0.904986	2.69819	0.316337	1.46681	0.225415	0.521305	0.0631106	0.356307	0.0471477	2.72112	0.318162	1.50811	1.05729	0.14212
KXW-X6-13			8.97364	1.35969	3.58397	3795.87	68.7629	108.257	79.895	4.01148	20.6887	0.501494	79.895	10.2638	bdl	94.7564	6.47481	103.092	1.10028	4.16118	0.0547136	12.4768	37.1615	4.84252	21.8087	3.88027	0.875819	2.83691	0.314375	1.5456	0.249981	0.504322	0.0566326	0.350656	0.0395153	2.40508	0.322452	1.51677	1.04503	0.135163
KXW-X6-14			10.654	1.82057	4.81129	2193.21	35.1621	126.323	94.9866	4.96907	25.8678	0.83841	94.9866	12.0957	0.0120073	106.559	8.15374	114.067	1.27807	2.10657	0.277267	16.7728	50.1422	6.37703	28.7443	5.05983	1.17499	3.67543	0.451165	1.9818	0.300127	0.609629	0.0794533	0.527779	0.0698899	2.59721	0.417365	1.95818	1.35734	0.172286
KXW-X6-15			14.9412	1.57248	5.33834	3253.75	76.0367	157.99	95.8049	4.84811	22.9353	1.80343	95.8049	13.3603	0.640764	104.864	8.73244	125.738	1.57751	2.83653	1.42112	16.7114	49.6699	6.62116	27.8341	5.20622	1.13463	3.73834	0.368184	1.85233	0.354591	0.758705	0.11033	0.521935	0.0613914	3.3248	0.418281	2.07588	1.46473	0.178627
KXW-X6-16			11.5139	1.89385	4.90278	3478.62	78.6563	123.067	88.2069	4.89199	26.3844	0.488461	88.2069	12.6712	0.163566	105.777	8.70682	129.076	1.80154	1.75214	0	17.4077	50.619	6.88893	28.8285	5.70525	1.32769	3.81745	0.455818	2.10172	0.346699	0.620754	0.0778442	0.5071	0.0634972	3.6827	0.496061	1.97883	1.54727	0.233636
KXW-X2-1	0.710168	0.000288521	10.7191	1.84719	5.01952	3036.29	72.1747	151.825	90.6521	4.91656	22.0256	0.40142	90.6521	13.3531	0.100361	109.031	8.60709	121.53	1.48804	1.95129	5.73472	16.4762	48.5782	6.70588	27.6724	5.41217	1.17682	3.23206	0.455263	2.04169	0.299947	0.700332	0.0807002	0.278838	0.0644809	3.65723	0.473968	1.94446	1.5781	0.142464
KXW-X2-2	0.7105	0.000246465	11.3887	2.2977	4.76193	3357.77	75.9706	115.148	96.8657	4.86327	24.385	0.97705	96.8657	13.5817	bdl	103.495	9.01956	126.828	1.46805	2.08228	0.00636053	16.6763	49.5715	6.70004	27.9208	5.76872	1.16834	3.56888	0.368231	2.01654	0.380366	0.657134	0.0914212	0.545315	0.0575008	3.60036	0.410544	1.93888	1.44295	0.138495
KXW-X2-3	0.709663	0.000278866	11.4228	1.4273	4.91254	3307.9	76.9121	122.304	89.9628	5.01556	25.0318	0.581559	89.9628	13.1499	0.188417	104.612	8.63318	132.184	1.43368	2.29187	0.0888324	16.8504	49.089	6.89786	28.0296	5.01012	1.12707	3.34822	0.461748	2.20207	0.276512	0.805166	0.0871085	0.505888	0.0818482	3.58513	0.426678	1.89027	1.47599	0.174134
KXW-X2-4	0.70996	0.000298529	11.9322	2.18621	4.89464	3301.16	76.1208	141.487	91.9816	4.65494	26.1182	0.701098	91.9816	13.0123	bdl	106.272	8.55199	131.127	1.65894	2.06418	0.161727	17.2461	49.5242	6.89117	27.9163	5.14171	1.22763	3.42557	0.379332	2.11548	0.295127	0.767974	0.0765464	0.365243	0.0523745	3.64852	0.472358	1.98051	1.57474	0.183238
KXW-X2-5			11.3436	1.76186	4.79057	2941.98	66.7126	124.533	91.8237	4.78814	22.9008	1.46292	91.8237	11.784	bdl	104.91	8.25149	113.885	1.41047	1.61312	0.0540679	16.3062	49.0168	6.29919	27.818	5.86496	1.14947	3.59005	0.418474	2.05822	0.298333	0.645418	0.0864899	0.423798	0.0778881	2.96352	0.429554	1.59377	1.38658	0.183645
KXW-X2-6			10.5334	0.207573	4.93731	2839.54	68.1127	124.342	94.4238	5.03461	26.9583	0.393695	94.4238	12.1565	bdl	109.16	8.23055	115.938	1.24721	1.63775	4.86899	16.8562	47.8898	6.50401	27.1956	4.8598	1.09155	3.49897	0.425398	1.74399	0.301892	0.558119	0.053572	0.341111	0.0535787	3.31515	0.365968	1.87395	1.42095	0.185901
KXW-X2-7			11.6051	3.08213	5.59468	3405.69	79.7765	93.2926	91.185	4.99999	22.2963	0.403547	91.185	13.6344	bdl	104.468	8.47503	130.594	1.3942	1.80192	0.028491	16.8919	50.1682	6.65645	29.3988	5.70559	1.18692	3.49142	0.457341	2.51183	0.350436	0.818096	0.0883424	0.578362	0.0663741	3.79373	0.472844	1.89111	1.61874	0.199406
KXW-X2-8			11.2853	1.2672	4.62793	3274.87	76.9251	103.893	96.4376	4.39165	25.5556	0.602316	96.4376	12.652	0.592862	112.194	8.78051	128.404	1.6299	2.30087	4.93005	29.2381	71.0381	8.40981	34.1173	5.30987	1.40092	4.17222	0.485243	2.14268	0.342857	0.67378	0.111719	0.471743	0.0665163	3.70655	0.480359	2.00741	2.82471	0.261925
KXW-X2-9			10.9147	1.89633	4.95785	3205.39	77.5213	126.034	95.3158	4.73112	22.6946	0.61123	95.3158	13.5085	0.140863	106.292	8.77855	132.524	1.48533	2.37853	bdl	16.4952	48.5413	6.85334	28.765	5.66587	1.14637	3.07043	0.432856	2.08752	0.355008	0.788771	0.0978819	0.398751	0.060997	3.86973	0.443502	1.9146	1.37945	0.197144
KXW-X2-10			11.3376	1.94013	5.10773	3186.67	77.1904	199.36	97.2589	4.85644	24.4704	0.474978	97.2589	12.4883	0.250394	106.454	8.73497	124.723	1.5782	1.58502	0.533484	16.7121	47.8261	6.5342	27.9461	4.63565	1.05928	3.82615	0.417287	1.97058	0.270459	0.697206	0.109809	0.487927	0.0550009	3.32142	0.480661	1.9625	1.48226	0.135405
KXW-X2-11			15.2544	1.79489	4.86565	3242.21	73.3339	116.43	84.8651	4.7282	37.1665	3.26459	84.8651	12.9038	2.16498	107.73	8.09242	133.467	1.70238	2.44637	0.414296	16.1002	46.0904	6.41558	25.1659	5.03342	1.20267	3.2492	0.405896	2.02231	0.343571	0.703764	0.0896586	0.554851	0.064355	3.7428	0.418384	1.88209	1.49383	0.316931
KXW-X9-1	0.709816	0.000216747	11.5959	2.35898	5.27425	3134.16	83.9697	133.856	94.7696	4.85874	24.0662	0.761637	94.7696	12.4737	0.0882025	115.851	8.50518	122.902	1.50014	1.80734	12.5039	19.564	51.9953	6.78456	27.0271	5.41238	1.14267	3.89995	0.423708	1.94632	0.308637	0.687649	0.102611	0.531952	0.0273775	4.11184	0.364807	2.10455	1.54626	0.234396
KXW-X9-2	0.710638	0.000298673	11.0059	1.06238	5.35836	3116.58	85.3393	144.086	97.2943	4.64646	20.8899	0.950841	97.2943	12.8616	0.383354	119.371	8.19069	122.249	1.3654	1.97991	16.801	20.5425	52.0408	6.71772	27.7861	5.58301	1.22607	3.30443	0.401484	1.84316	0.280147	0.710306	0.097997	0.463425	0.0893906	3.97686	0.367427	2.15048	1.86291	0.226107
KXW-X9-3	0.710461	0.000279229	11.8109	1.28588	5.40557	3406.91	83.8904	111.911	98.4792	4.94413	23.2596	0.513158	98.4792	13.6699	0.43177	113.964	8.87781	131.26	1.43706	2.24788	13.4316	17.9267	49.3472	6.60281	28.3404	5.41386	1.2583	3.24384	0.38601	1.78132	0.367231	0.868485	0.103874	0.410437	0.0658396	4.12068	0.413294	2.17024	1.69283	0.221728
KXW-X9-4	0.710277	0.000275306	11.0043	2.25666	4.96861	3328.22	84.9204	114.751	98.1222	4.47953	19.4763	0.766707	98.1222	13.2105	0	107.192	8.49066	125.862	1.47208	2.58231	bdl	16.4256	48.9377	6.52699	28.4694	5.18169	1.20515	3.77039	0.462836	1.9197	0.343943	0.811687	0.0745239	0.478888	0.0577648	4.24515	0.360888	1.78052	1.34344	0.217958
KXW-X9-5	0.709534	0.000299833	10.5705	2.52039	5.31605	3121.74	80.5556	96.4037	96.0426	4.85559	24.442	0.945422	96.0426	12.5759	0.13074	121.573	8.82776	126.78	1.35811	2.14599	18.3649	19.1304	51.4459	6.77244	28.5796	6.09151	1.14231	4.07844	0.472857	1.99631	0.335338	0.545675	0.0656527	0.425004	0.0617365	3.71881	0.411159	2.03413	1.48225	0.208804
KXW-X9-6	0.711014	0.000305781	11.5814	2.33287	5.15998	3215.47	80.038	89.5412	99.4535	4.79409	26.8716	0.632486	99.4535	13.0482	bdl	107.072	8.88576	124.033	1.34797	2.02702	bdl	16.3134	48.7256	6.59209	28.4115	5.66113	1.14319	3.65303	0.421208	1.86693	0.317526	0.690507	0.107268	0.587465	0.0469729	3.74689	0.34077	1.70373	1.36469	0.160829
KXW-X9-7	0.71028	0.000387919	11.6944	1.87873	5.17022	3190.17	80.2693	132.779	96.8112	4.75779	25.0223	1.14173	96.8112	13.1361	0.16248	106.6	8.51329	129.811	1.37218	1.91557	0.103215	16.0219	49.3553	6.7944	28.0832	5.63058	1.3225	3.79582	0.393971	2.15309	0.303314	0.762095	0.0965546	0.424157	0.0393017	3.81906	0.370991	1.66479	1.47673	0.213968
KXW-X9-8	0.710194	0.000329173	11.2986	1.59289	5.26829	3490.37	80.867	100.645	93.0303	4.48551	23.0567	0.707978	93.0303	13.2852	0.223875	104.593	9.00902	134.592	1.6439	2.31516	0.132411	16.8675	50.8384	6.58578	29.1347	5.22126	1.28499	4.19967	0.466695	2.23721	0.349439	0.795967	0.0972929	0.499394	0.0745797	3.97626	0.493884	1.82413	1.53769	0.220639
The data source are from Tang et al. (2022).
Tang, G.-J., Wyman, D. A., Wang, Q., Ma, L., Dan, W., Yang, Y.-N., Liu, X.-J., and Chen, H.-Y., 2022, Links between continental subduction and generation of Cenozoic potassic–ultrapotassic rocks revealed by olivine oxygen isotopes: A case study from NW Tibet: Contributions to Mineralogy and Petrology, v. 177, https://doi.org/10.1007/s00410-022-01920-x.

## Sheet: Table S6
Table S6. Compiled Mg-Zn-Mo-Sr isotopes of Cenozoic rocks shown in Figure 3.
Location	Sample	δ26Mg (‰)	2SD	δ66Zn (‰)	2SD	δ98Mo (‰)	2SD	87Sr/86Sr	Reference
K-rich lavas from Southern Tibet	CQ01*	-0.28	0.08					0.72281	Liu et al. (2015)
K-rich lavas from Southern Tibet	CQ02*	-0.26	0.08					0.716194	Liu et al. (2015)
K-rich lavas from Southern Tibet	CQ03*	-0.35	0.08					0.724697	Liu et al. (2015)
K-rich lavas from Southern Tibet	D9103*	-0.4	0.08					0.719414	Liu et al. (2015)
K-rich lavas from Southern Tibet	GGP-7*	-0.35	0.08					0.715817	Liu et al. (2015)
K-rich lavas from Southern Tibet	XR01-3*	-0.29	0.08					0.721161	Liu et al. (2015)
K-rich lavas from Southern Tibet	XR02-1*	-0.3	0.05					0.736451	Liu et al. (2015)
K-rich lavas from Southern Tibet	XR1102	-0.29	0.01					0.716657	Liu et al. (2015)
K-rich lavas from Southern Tibet	DR01-2*	-0.42	0.05					0.718043	Liu et al. (2015)
K-rich lavas from Southern Tibet	DR1103	-0.44	0.03					0.719745	Liu et al. (2015)
K-rich lavas from Southern Tibet	DR1107	-0.36	0.09					0.718702	Liu et al. (2015)
K-rich lavas from Southern Tibet	DR1113	-0.45	0.06					0.719773	Liu et al. (2015)
K-rich lavas from Southern Tibet	DR1114	-0.46	0.04					0.719961	Liu et al. (2015)
K-rich lavas from Southern Tibet	ZB1*	-0.26	0.05					0.711352	Liu et al. (2015)
K-rich lavas from Southern Tibet	ZB4*	-0.27	0.05					0.711075	Liu et al. (2015)
K-rich lavas from Southern Tibet	ZB12*	-0.26	0.05					0.712408	Liu et al. (2015)
K-rich lavas from Southern Tibet	ZB1102	-0.28	0.02					0.711252	Liu et al. (2015)
K-rich lavas from Southern Tibet	ZB1108	-0.22	0.05					0.711373	Liu et al. (2015)
K-rich lavas from Southern Tibet	ZB1112	-0.3	0.03					0.711241	Liu et al. (2015)
K-rich lavas from Southern Tibet	SL0621*	-0.27	0.06					0.71909	Liu et al. (2015)
K-rich lavas from Southern Tibet	SL0630*	-0.3	0.05						Liu et al. (2015)
K-rich lavas from Southern Tibet	SLP1101	-0.31	0.05					0.71981	Liu et al. (2015)
K-rich lavas from Southern Tibet	XN1201	-0.29	0.03					0.711178	Liu et al. (2015)
K-rich lavas from Southern Tibet	XN1203	-0.24	0.05					0.711569	Liu et al. (2015)
K-rich lavas from Southern Tibet	XN1206	-0.28	0.02					0.711474	Liu et al. (2015)
K-rich lavas from Southern Tibet	XN1207	-0.25	0.04					0.710747	Liu et al. (2015)
K-rich lavas from Southern Tibet	XN1208	-0.31	0.03					0.713008	Liu et al. (2015)
K-rich lavas from Southern Tibet	XB1207	-0.27	0.05					0.717597	Liu et al. (2015)
K-rich lavas from Southern Tibet	XB1210	-0.35	0.02					0.720108	Liu et al. (2015)
K-rich lavas from Southern Tibet	XB1214	-0.3	0.02					0.718906	Liu et al. (2015)
K-rich lavas from Southern Tibet	XB1230	-0.34	0.02					0.727526	Liu et al. (2015)
K-rich lavas from Southern Tibet	XB1232	-0.33	0.03					0.724916	Liu et al. (2015)
K-rich lavas from Southern Tibet	XB1233	-0.3	0.07					0.722197	Liu et al. (2015)
K-rich lavas from Southern Tibet	XB1234	-0.28	0.04					0.72308	Liu et al. (2015)
K-rich lavas from Southern Tibet	XB1237	-0.31	0.05					0.723372	Liu et al. (2015)
K-rich lavas from Southern Tibet	XB1241	-0.36	0.05					0.724377	Liu et al. (2015)
K-rich lavas from Southern Tibet	XB1242	-0.34	0.07					0.72539	Liu et al. (2015)
K-rich lavas from Southern Tibet	XB1253	-0.27	0.02					0.719685	Liu et al. (2015)
K-rich lavas from Southern Tibet	XB1254	-0.28	0.08					0.719629	Liu et al. (2015)
K-rich lavas from Southern Tibet	XB1257	-0.32	0.04					0.713924	Liu et al. (2015)
K-rich lavas from Southern Tibet	XB1258	-0.29	0.04					0.713877	Liu et al. (2015)
K-rich lavas from Southern Tibet	SLP-03					-0.24	0.06	0.72715	Huang et al. (2023)
K-rich lavas from Southern Tibet	SLP-05					-0.42	0.04	0.727153	Huang et al. (2023)
K-rich lavas from Southern Tibet	SLP-07					-0.39	0.05	0.725402	Huang et al. (2023)
K-rich lavas from Southern Tibet	SLP-09					-0.2	0.05	0.72695	Huang et al. (2023)
K-rich lavas from Southern Tibet	SLP-10-2					-0.3	0	0.727527	Huang et al. (2023)
K-rich lavas from Southern Tibet	SLP-11					-0.45	0.05	0.727162	Huang et al. (2023)
K-rich lavas from Southern Tibet	SLP-12					-0.31	0.05	0.728055	Huang et al. (2023)
K-rich lavas from Southern Tibet	SLP-14					-0.28	0.04	0.72755	Huang et al. (2023)
K-rich lavas from Southern Tibet	SLP-15-2					-0.13	0.07	0.727136	Huang et al. (2023)
K-rich lavas from Southern Tibet	SLP-16					-0.44	0.04	0.727099	Huang et al. (2023)
K-rich lavas from Southern Tibet	SLP-18					-0.26	0.05	0.725922	Huang et al. (2023)
K-rich lavas from Southern Tibet	13SLP03-3					-0.27	0.06	0.727246	Zhang et al. (2023)
K-rich lavas from Southern Tibet	13SLP07-1					-0.3	0.05	0.732049	Zhang et al. (2023)
K-rich lavas from Southern Tibet	13SLP12-1					-0.07	0.03	0.71936	Zhang et al. (2023)
K-rich lavas from Southern Tibet	13SLP15-1					-0.21	0.06	0.71863	Zhang et al. (2023)
K-rich lavas from Southern Tibet	13SLP16-1					-0.51	0.06	0.723395	Zhang et al. (2023)
K-rich lavas from Southern Tibet	13SLP17-2					-0.28	0.04	0.721372	Zhang et al. (2023)
K-rich lavas from Southern Tibet	13SLP20-3					-0.66	0.06	0.721237	Zhang et al. (2023)
K-rich lavas from Southern Tibet	13SLP35-2					-0.41	0.06	0.72025	Zhang et al. (2023)
K-rich lavas from Southern Tibet	13SLP40-2					-0.17	0.05	0.721598	Zhang et al. (2023)
K-rich lavas from Southern Tibet	18SLP10-1					-0.14	0.04	0.71741	Zhang et al. (2023)
K-rich lavas from Southern Tibet	18SLP10-3					-0.24	0.03	0.717428	Zhang et al. (2023)
K-rich lavas from Southern Tibet	13SLP10-1					-0.45	0.07	0.721595	Zhang et al. (2023)
K-rich lavas from Southern Tibet	13SLP11-1					-0.19	0.07	0.721223	Zhang et al. (2023)
K-rich lavas from SE Tibet	HZ04			0.24	0.01			0.706493	Liu et al. (2020)
K-rich lavas from SE Tibet	HZ06	-0.22	0.02	0.22	0.05			0.706769	Liu et al. (2020)
K-rich lavas from SE Tibet	HZ09	-0.22	0.02	0.18	0.02			0.706547	Liu et al. (2020)
K-rich lavas from SE Tibet	HZ10	-0.21	0.01	0.21	0.06			0.706542	Liu et al. (2020)
K-rich lavas from SE Tibet	HZ13	-0.24	0.01	0.18	0.05			0.706396	Liu et al. (2020)
K-rich lavas from SE Tibet	HZ14	-0.23	0.02	0.2	0.06			0.706778	Liu et al. (2020)
K-rich lavas from SE Tibet	HZ15	-0.27	0.02	0.23	0.01			0.706846	Liu et al. (2020)
K-rich lavas from SE Tibet	WS05	-0.31	0.03	0.3	0.02			0.70687	Liu et al. (2020)
K-rich lavas from SE Tibet	WS06	-0.27	0.01	0.26	0.05			0.706976	Liu et al. (2020)
K-rich lavas from SE Tibet	WS09	-0.24	0.01	0.21	0.06			0.705952	Liu et al. (2020)
K-rich lavas from SE Tibet	WS10			0.24	0.02			0.706321	Liu et al. (2020)
K-rich lavas from SE Tibet	XGC02	-1.01	0.01	0.32	0.03			0.70647	Liu et al. (2020)
K-rich lavas from SE Tibet	XGC03	-0.38	0.01	0.24	0.03			0.707232	Liu et al. (2020)
K-rich lavas from SE Tibet	XGC05	-0.47	0.04	0.3	0.04			0.706509	Liu et al. (2020)
K-rich lavas from SE Tibet	XGC06	-0.53	0.02	0.31	0.01			0.706504	Liu et al. (2020)
K-rich lavas from SE Tibet	XGC08	-0.52	0.02	0.24	0.01			0.706511	Liu et al. (2020)
K-rich lavas from circum-Meditteranean	03V16	-0.33	0.02	0.3	0.02			0.72092	Shu et al. (2023)
K-rich lavas from circum-Meditteranean	03J09	-0.34	0.05	0.31	0.01			0.71401	Shu et al. (2023)
K-rich lavas from circum-Meditteranean	03J10	-0.37	0.01	0.3	0.02			0.71497	Shu et al. (2023)
K-rich lavas from circum-Meditteranean	03CX02	-0.27	0.05	0.3	0.03			0.71741	Shu et al. (2023)
K-rich lavas from circum-Meditteranean	02CX05	-0.37	0.02	0.31	0.02			0.71744	Shu et al. (2023)
K-rich lavas from circum-Meditteranean	03FC01	-0.32	0.03	0.3	0.05			0.71803	Shu et al. (2023)
K-rich lavas from circum-Meditteranean	03FC02	-0.34	0.03	0.28	0.04			0.71854	Shu et al. (2023)
K-rich lavas from circum-Meditteranean	04CR02	-0.32	0.03	0.31	0.03			0.70761	Shu et al. (2023)
K-rich lavas from circum-Meditteranean	04CR01	-0.35	0.04	0.3	0.02			0.70759	Shu et al. (2023)
K-rich lavas from circum-Meditteranean	04SL01	-0.46	0.02	0.35	0.03			0.70788	Shu et al. (2023)
K-rich lavas from circum-Meditteranean	03KK01	-0.24	0.07	0.29	0.05			0.71015	Shu et al. (2023)
K-rich lavas from circum-Meditteranean	05RR02	-0.32	0.05	0.35	0.06			0.71769	Shu et al. (2023)
K-rich lavas from circum-Meditteranean	05VDA03	-0.37	0.06	0.32	0.03			0.71714	Shu et al. (2023)
K-rich lavas from circum-Meditteranean	Bo2-1	-0.24	0.05	0.3	0.05			0.70893	Shu et al. (2023)
K-rich lavas from circum-Meditteranean	Bo2-2	-0.39	0.04	0.34	0.03			0.7089	Shu et al. (2023)
K-rich lavas from circum-Meditteranean	BK01/3-1	-0.39	0.04	0.31	0.04			0.71162	Shu et al. (2023)
K-rich lavas from circum-Meditteranean	BK01/3C	-0.34	0.04	0.29	0.02			0.71069	Shu et al. (2023)
K-rich lavas from circum-Meditteranean	BK01/3A-2	-0.32	0.03	0.31	0.01			0.71144	Shu et al. (2023)
K-rich lavas from circum-Meditteranean	KR01/1	-0.44	0.04	0.28	0.02			0.706	Shu et al. (2023)
K-rich lavas from circum-Meditteranean	NV01/7	-0.31	0.06	0.31	0.03			0.70709	Shu et al. (2023)
K-rich lavas from circum-Meditteranean	NV01/4	-0.32	0.02	0.29	0.06			0.70655	Shu et al. (2023)
K-rich lavas from circum-Meditteranean	NV01/6C	-0.22	0.04	0.3	0.05			0.70622	Shu et al. (2023)
K-rich lavas from circum-Meditteranean	TR01/2	-0.41	0.06	0.3	0.02			0.70602	Shu et al. (2023)
K-rich lavas from circum-Meditteranean	TR01/1	-0.36	0.04	0.32	0.04			0.70582	Shu et al. (2023)
K-rich lavas from circum-Meditteranean	DZI/2	-0.22	0.04	0.33	0.04			0.70674	Shu et al. (2023)
K-rich lavas from circum-Meditteranean	05KD012	-0.21	0.01	0.34	0.04			0.71001	Shu et al. (2023)
K-rich lavas from circum-Meditteranean	06KD21	-0.24	0.01	0.32	0.06			0.70781	Shu et al. (2023)
K-rich lavas from circum-Meditteranean	05GU01	-0.55	0.01	0.27	0.05			0.70834	Shu et al. (2023)
K-rich lavas from circum-Meditteranean	05GU02	-0.42	0.03	0.31	0.02			0.71002	Shu et al. (2023)
K-rich lavas from circum-Meditteranean	06AF03	-0.51	0.02	0.29	0.08			0.70593	Shu et al. (2023)
K-rich lavas from circum-Meditteranean	06KZ01	-0.51	0.03	0.29	0.04			0.70824	Shu et al. (2023)
K-rich lavas from circum-Meditteranean	05IL02	-0.23	0.02	0.31	0.06			0.70729	Shu et al. (2023)
K-rich lavas from circum-Meditteranean	05BH05	-0.21	0.02	0.3	0.05			0.70796	Shu et al. (2023)
K-rich lavas from circum-Meditteranean	31	-0.28	0.02	0.34	0.03			0.70553	Shu et al. (2023)
K-rich lavas from circum-Meditteranean	42	-0.35	0.04	0.31	0.04			0.70631	Shu et al. (2023)
K-rich lavas from circum-Meditteranean	29	-0.32	0.02	0.34	0.03			0.70432	Shu et al. (2023)
K-rich lavas from circum-Meditteranean	23/A	-0.33	0.02	0.32	0.04			0.70627	Shu et al. (2023)
K-rich lavas from circum-Meditteranean	19/A	-0.61	0.01	0.31	0.01			0.70594	Shu et al. (2023)
K-rich lavas from circum-Meditteranean	1/A	-0.46	0.02	0.26	0.04			0.70562	Shu et al. (2023)
K-rich lavas from circum-Meditteranean	MVC100					0.223	0.029	0.716723	Casalini et al. (2019)
K-rich lavas from circum-Meditteranean	ORC 01					0.13	0.03	0.715791	Casalini et al. (2019)
K-rich lavas from circum-Meditteranean	ORC 04					0.138	0.019	0.715691	Casalini et al. (2019)
K-rich lavas from circum-Meditteranean	VS 123					0.138	0.021	0.713509	Casalini et al. (2019)
K-rich lavas from circum-Meditteranean	VS 114					0.169	0.028	0.715567	Casalini et al. (2019)
K-rich lavas from circum-Meditteranean	VS 184					0.146	0.018	0.715882	Casalini et al. (2019)
K-rich lavas from circum-Meditteranean	VS 29					0.081	0.024	0.715784	Casalini et al. (2019)
K-rich lavas from circum-Meditteranean	VS 28					0.073	0.026	0.715916	Casalini et al. (2019)
K-rich lavas from circum-Meditteranean	VES 01					0.133	0.028	0.707311	Casalini et al. (2019)
K-rich lavas from circum-Meditteranean	VES 07					0.172	0.028	0.707617	Casalini et al. (2019)
K-rich lavas from circum-Meditteranean	VES 18					0.175	0.021	0.707437	Casalini et al. (2019)
K-rich lavas from circum-Meditteranean	VES 16					0.098	0.023	0.70719	Casalini et al. (2019)
K-rich lavas from circum-Meditteranean	VES 17					0.134	0.029	0.707228	Casalini et al. (2019)
K-rich lavas from circum-Meditteranean	97VS718b					0.239	0.023	0.707729	Casalini et al. (2019)
K-rich lavas from circum-Meditteranean	95VS135					0.257	0.025	0.707325	Casalini et al. (2019)
Himalaya leucogranites	SN34-6					-0.15	0.06	0.733312	Fan et al. (2021)
Himalaya leucogranites	SN35-2					0.36	0.07	0.735213	Fan et al. (2021)
Himalaya leucogranites	SN36-2					-0.02	0.07	0.732867	Fan et al. (2021)
Himalaya leucogranites	SN37-1					-0.04	0.07	0.730174	Fan et al. (2021)
Himalaya leucogranites	SN37-2					0.05	0.09	0.730162	Fan et al. (2021)
Himalaya leucogranites	SN37-3-1					-0.07	0.06	0.753446	Fan et al. (2021)
Himalaya leucogranites	SN34-5					0.17	0.08		Fan et al. (2021)
Himalaya leucogranites	SN36-5					0.05	0.08	0.733372	Fan et al. (2021)
Himalaya leucogranites	SN36-6					-0.2	0.08	0.726086	Fan et al. (2021)
Himalaya leucogranites	SN38-1					-0.05	0.08	0.719049	Fan et al. (2021)
Himalaya leucogranites	SN38-2					-0.15	0.08		Fan et al. (2021)
Himalaya leucogranites	SN35-1					0	0.04	0.737498	Fan et al. (2021)
Himalaya leucogranites	RB-6			0.28	0.05				Wang et al. (2020)
Himalaya leucogranites	RB-9	-0.04	0.02	0.32	0.01				Wang et al. (2020)
Himalaya leucogranites	RB-11	0	0.06	0.34	0.03				Wang et al. (2020)
Himalaya leucogranites	RB-13	0	0.02	0.32	0.03				Wang et al. (2020)
Himalaya leucogranites	RB-15	0.05	0.02	0.29	0.05				Wang et al. (2020)
Himalaya leucogranites	LKZ-1	-0.03	0.06	0.29	0.02			0.730955	Wang et al. (2020)
Himalaya leucogranites	LKZ-2	-0.01	0.01	0.46	0.01			0.726953	Wang et al. (2020)
Himalaya leucogranites	LKZ-3	0.01	0.01	0.36	0.04			0.726967	Wang et al. (2020)
Himalaya leucogranites	LKZ-4	0.05	0.06	0.35	0.05			0.72715	Wang et al. (2020)
Himalaya leucogranites	LKZ-5	-0.07	0.02	0.29	0.05			0.716426	Wang et al. (2020)
Himalaya leucogranites	LKZ-6			0.3	0.02			0.716782	Wang et al. (2020)
Himalaya leucogranites	CB-295	0.13	0.02	0.34	0.03				Wang et al. (2020)
Himalaya leucogranites	CB-291	-0.14	0.02	0.54	0.03				Wang et al. (2020)
Himalaya leucogranites	CB-292			0.41	0.04				Wang et al. (2020)
Himalaya leucogranites	CB-293	-0.18	0.02	0.38	0.02				Wang et al. (2020)
Himalaya leucogranites	110918	-0.56	0.03	0.43	0.03				Wang et al. (2020)
Himalaya leucogranites	110919	-0.54	0.01	0.47	0.03				Wang et al. (2020)
Himalaya leucogranites	110923	-1.32	0.02	0.52	0.02				Wang et al. (2020)
Himalaya leucogranites	12FW10	-0.84	0.03	0.69	0.01				Wang et al. (2020)
Himalaya leucogranites	12FW14	-0.63	0.03	0.35	0.03				Wang et al. (2020)
Himalaya leucogranites	12FW15	-0.83	0.06	0.4	0.05				Wang et al. (2020)
Himalaya leucogranites	YAD12-1-2			0.36	0.03				Wang et al. (2020)
Himalaya leucogranites	YAD12-1-3	-0.22	0.02	0.36	0.03				Wang et al. (2020)
Himalaya leucogranites	YAD12-3-1	-0.15	0.04	0.36	0.03				Wang et al. (2020)
Himalaya leucogranites	YAD12-4-1			0.36	0.01				Wang et al. (2020)
Himalaya leucogranites	YAD12-4-2	-0.18	0.01	0.34	0.03				Wang et al. (2020)
Cenozoic alkali basalts from East Asia	07CDS05			0.32	0.01	-0.38	0.03	0.703687	Li et al. (2019)
Cenozoic alkali basalts from East Asia	07CDS07			0.33	0.05	-0.47	0.03	0.703782	Li et al. (2019)
Cenozoic alkali basalts from East Asia	07FYS02			0.32	0.03	-0.31	0.04	0.704035	Li et al. (2019)
Cenozoic alkali basalts from East Asia	07FYS09			0.37	0	-0.22	0.03	0.704459	Li et al. (2019)
Cenozoic alkali basalts from East Asia	07LIS02			0.37	0.01	-0.26	0.03	0.703613	Li et al. (2019)
Cenozoic alkali basalts from East Asia	07LIS04			0.4	0.03	-0.37	0.02	0.703633	Li et al. (2019)
Cenozoic alkali basalts from East Asia	07SW01			0.34	0.01	-0.31	0.02	0.704306	Li et al. (2019)
Cenozoic alkali basalts from East Asia	07SW03			0.36	0.04	-0.56	0.02	0.704437	Li et al. (2019)
Cenozoic alkali basalts from East Asia	07FS01			0.4	0.05	-0.15	0.04	0.70329	Li et al. (2019)
Cenozoic alkali basalts from East Asia	07FS03			0.42	0.04	-0.27	0.03	0.703297	Li et al. (2019)
Cenozoic alkali basalts from East Asia	07LS05			0.4	0	-0.25	0.03	0.7034	Li et al. (2019)
Cenozoic alkali basalts from East Asia	07THS02			0.4	0.03	-0.22	0.02	0.703268	Li et al. (2019)
Cenozoic alkali basalts from East Asia	07THS03			0.4	0.02	-0.04	0.02	0.703332	Li et al. (2019)
Cenozoic alkali basalts from East Asia	07CDS06					-0.49	0.03	0.703695	Li et al. (2019)
Cenozoic alkali basalts from East Asia	WF12					-0.2	0.02		Li et al. (2019)
Cenozoic alkali basalts from East Asia	WF22					-0.12	0.02		Li et al. (2019)
Cenozoic alkali basalts from East Asia	WF32					-0.12	0.03		Li et al. (2019)
Cenozoic alkali basalts from East Asia	YS11					-0.1	0.02		Li et al. (2019)
Cenozoic alkali basalts from East Asia	YS13					-0.15	0.03		Li et al. (2019)
Cenozoic alkali basalts from East Asia	CZ					-0.23	0.03		Li et al. (2019)
Cenozoic alkali basalts from East Asia	17WD01					-0.31	0.03		Li et al. (2019)
Cenozoic alkali basalts from East Asia	17WD02					-0.3	0.05		Li et al. (2019)
Cenozoic alkali basalts from East Asia	17WD03					-0.24	0.02		Li et al. (2019)
Cenozoic alkali basalts from East Asia	17WD04					-0.28	0.04		Li et al. (2019)
Cenozoic alkali basalts from East Asia	17WD05					-0.22	0.03		Li et al. (2019)
Cenozoic alkali basalts from East Asia	07CDS01			0.31	0.02			0.703734	Wang et al. (2018)
Cenozoic alkali basalts from East Asia	07CDS02			0.33	0.03			0.703969	Wang et al. (2018)
Cenozoic alkali basalts from East Asia	07CDS03			0.31	0.06				Wang et al. (2018)
Cenozoic alkali basalts from East Asia	07CDS04			0.36	0.03			0.704023	Wang et al. (2018)
Cenozoic alkali basalts from East Asia	07FYS01			0.31	0.03			0.703961	Wang et al. (2018)
Cenozoic alkali basalts from East Asia	07FYS03			0.31	0.05			0.703956	Wang et al. (2018)
Cenozoic alkali basalts from East Asia	07FYS04			0.34	0.07			0.70382	Wang et al. (2018)
Cenozoic alkali basalts from East Asia	07FYS06			0.4	0.01			0.704138	Wang et al. (2018)
Cenozoic alkali basalts from East Asia	07FYS07			0.34	0.02			0.703426	Wang et al. (2018)
Cenozoic alkali basalts from East Asia	07FYS10			0.32	0.04			0.704064	Wang et al. (2018)
Cenozoic alkali basalts from East Asia	07JSS01			0.45	0.03				Wang et al. (2018)
Cenozoic alkali basalts from East Asia	07JSS02			0.44	0.03				Wang et al. (2018)
Cenozoic alkali basalts from East Asia	07JSS03			0.43	0.02				Wang et al. (2018)
Cenozoic alkali basalts from East Asia	07JSS04			0.45	0.04				Wang et al. (2018)
Cenozoic alkali basalts from East Asia	07JSS05			0.45	0.02				Wang et al. (2018)
Cenozoic alkali basalts from East Asia	07LIS01			0.44	0.05			0.703323	Wang et al. (2018)
Cenozoic alkali basalts from East Asia	07LS04			0.41	0.04			0.703405	Wang et al. (2018)
Cenozoic alkali basalts from East Asia	07LS06			0.5	0.03			0.703413	Wang et al. (2018)
Cenozoic alkali basalts from East Asia	07LS07			0.4	0.01			0.703346	Wang et al. (2018)
Cenozoic alkali basalts from East Asia	07NIS02			0.4	0.04			0.703737	Wang et al. (2018)
Cenozoic alkali basalts from East Asia	07NIS04			0.4	0.02			0.70394	Wang et al. (2018)
Cenozoic alkali basalts from East Asia	07SW02			0.34	0.02			0.704397	Wang et al. (2018)
Cenozoic alkali basalts from East Asia	08GDS01			0.4	0.03				Wang et al. (2018)
Cenozoic alkali basalts from East Asia	08GDS02			0.5	0.04				Wang et al. (2018)
Cenozoic alkali basalts from East Asia	08GDS03			0.4	0.01				Wang et al. (2018)
Cenozoic alkali basalts from East Asia	08GDS04			0.4	0.03				Wang et al. (2018)
Cenozoic alkali basalts from East Asia	08GDS05			0.4	0.03				Wang et al. (2018)
Cenozoic alkali basalts from East Asia	08LHS01			0.48	0.06				Wang et al. (2018)
Cenozoic alkali basalts from East Asia	08LHS02			0.45	0.01				Wang et al. (2018)
Cenozoic alkali basalts from East Asia	08LHS03			0.43	0.04				Wang et al. (2018)
Cenozoic alkali basalts from East Asia	08LHS04			0.47	0.01				Wang et al. (2018)
Cenozoic alkali basalts from East Asia	08LHS05			0.46	0.04				Wang et al. (2018)
Cenozoic alkali basalts from East Asia	08LHS06			0.44	0.03				Wang et al. (2018)
Cenozoic alkali basalts from East Asia	08LHS07			0.45	0.02				Wang et al. (2018)
Cenozoic alkali basalts from East Asia	08NIUS01			0.44	0.03				Wang et al. (2018)
Cenozoic alkali basalts from East Asia	08NIUS02			0.45	0.01				Wang et al. (2018)
Cenozoic alkali basalts from East Asia	08NIUS03			0.43	0.03				Wang et al. (2018)
Cenozoic alkali basalts from East Asia	08QJFS01			0.48	0.04				Wang et al. (2018)
Cenozoic alkali basalts from East Asia	08QJFS02			0.45	0.04				Wang et al. (2018)
Cenozoic alkali basalts from East Asia	08QJFS03			0.44	0.03				Wang et al. (2018)
Cenozoic alkali basalts from East Asia	08QJFS04			0.5	0.05				Wang et al. (2018)
Cenozoic alkali basalts from East Asia	08QJFS05			0.5	0.02				Wang et al. (2018)
Cenozoic alkali basalts from East Asia	08QJFS06			0.5	0.02				Wang et al. (2018)
Cenozoic alkali basalts from East Asia	08QJFS07			0.4	0.06				Wang et al. (2018)
Cenozoic alkali basalts from East Asia	17CT01	-0.35	0.06	0.33	0.04			0.703913	Wang et al. (2021)
Cenozoic alkali basalts from East Asia	17CT03	-0.31	0.06	0.36	0.04			0.703891	Wang et al. (2021)
Cenozoic alkali basalts from East Asia	17CT04	-0.32	0.06	0.33	0.04			0.703908	Wang et al. (2021)
Cenozoic alkali basalts from East Asia	17CT06	-0.3	0.06	0.36	0.04			0.704229	Wang et al. (2021)
Cenozoic alkali basalts from East Asia	17CT08	-0.33	0.06	0.34	0.04			0.704266	Wang et al. (2021)
Cenozoic alkali basalts from East Asia	17CT09	-0.32	0.06	0.35	0.04			0.704227	Wang et al. (2021)
Cenozoic alkali basalts from East Asia	17YG01	-0.3	0.06	0.31	0.04			0.704591	Wang et al. (2021)
Cenozoic alkali basalts from East Asia	17YG02	-0.31	0.06	0.28	0.04			0.704669	Wang et al. (2021)
Cenozoic alkali basalts from East Asia	17YG04	-0.29	0.06	0.29	0.04			0.704643	Wang et al. (2021)
Cenozoic alkali basalts from East Asia	17YG06	-0.28	0.06	0.3	0.04			0.704551	Wang et al. (2021)
Cenozoic alkali basalts from East Asia	17DT18	-0.34	0.06	0.37	0.04			0.704209	Wang et al. (2021)
Cenozoic alkali basalts from East Asia	17DT01	-0.41	0.06	0.44	0.04			0.703656	Wang et al. (2021)
Cenozoic alkali basalts from East Asia	17DT02	-0.42	0.06	0.43	0.04			0.703562	Wang et al. (2021)
Cenozoic alkali basalts from East Asia	17DT05	-0.41	0.06	0.46	0.04			0.70322	Wang et al. (2021)
Cenozoic alkali basalts from East Asia	17DT06	-0.4	0.06	0.42	0.04			0.703873	Wang et al. (2021)
Cenozoic alkali basalts from East Asia	17DT07	-0.38	0.06	0.41	0.04			0.703841	Wang et al. (2021)
Cenozoic alkali basalts from East Asia	17DT16	-0.4	0.06	0.44	0.04			0.703725	Wang et al. (2021)
Cenozoic alkali basalts from East Asia	17DT17	-0.38	0.06	0.42	0.04			0.703365	Wang et al. (2021)
Cenozoic alkali basalts from East Asia	17GLS03	-0.4	0.06	0.4	0.04			0.703686	Wang et al. (2021)
Cenozoic alkali basalts from East Asia	LC01	-0.33	0.02	0.48	0.03			0.704143	Liu et al. (2020)
Cenozoic alkali basalts from East Asia	LC03	-0.39	0.01	0.46	0.03			0.703747	Liu et al. (2020)
Cenozoic alkali basalts from East Asia	LC04	-0.39	0.01	0.49	0.02			0.704359	Liu et al. (2020)
Cenozoic alkali basalts from East Asia	LC05	-0.37	0.04	0.51	0.03			0.704093	Liu et al. (2020)
Cenozoic alkali basalts from East Asia	ZJS01	-0.44	0.03	0.39	0.03			0.703902	Liu et al. (2020)
Cenozoic alkali basalts from East Asia	PZ01	-0.4	0.01	0.45	0.02			0.704756	Liu et al. (2020)
Cenozoic alkali basalts from East Asia	AJW01	-0.4	0.01	0.42	0.03			0.704773	Liu et al. (2020)
Cenozoic alkali basalts from East Asia	AJW02	-0.4	0.04	0.43	0.02			0.704753	Liu et al. (2020)
Cenozoic alkali basalts from East Asia	AJW03	-0.39	0.02	0.45	0.03			0.70483	Liu et al. (2020)
Cenozoic alkali basalts from East Asia	AJW06	-0.35	0.04	0.44	0.06			0.704743	Liu et al. (2020)
Cenozoic alkali basalts from East Asia	JG-01	-0.46	0.06	0.45	0.05				Shu et al. (2023)
Cenozoic alkali basalts from East Asia	JG-02	-0.54	0.06	0.46	0.04				Shu et al. (2023)
Cenozoic alkali basalts from East Asia	JG-03	-0.48	0.06	0.41	0.01				Shu et al. (2023)
Cenozoic alkali basalts from East Asia	JG-04	-0.53	0.06	0.45	0.04				Shu et al. (2023)
Cenozoic alkali basalts from East Asia	JG-05	-0.46	0.06	0.42	0.05				Shu et al. (2023)
Cenozoic alkali basalts from East Asia	JG-06	-0.47	0.06	0.45	0.06				Shu et al. (2023)
Cenozoic alkali basalts from East Asia	JG-07	-0.6	0.06	0.44	0.03				Shu et al. (2023)
Cenozoic alkali basalts from East Asia	JG-08	-0.49	0.06	0.46	0.05				Shu et al. (2023)
Cenozoic alkali basalts from East Asia	JG-09	-0.49	0.06	0.43	0.04				Shu et al. (2023)
Cenozoic alkali basalts from East Asia	13PMS1	-0.52	0.07	0.55	0.05				Shu et al. (2023)
Cenozoic alkali basalts from East Asia	13PMS2	-0.53	0.04	0.53	0.03				Shu et al. (2023)
Cenozoic alkali basalts from East Asia	13PMS3	-0.52	0.05	0.56	0.03				Shu et al. (2023)
Cenozoic alkali basalts from East Asia	13PMS6	-0.52	0.05	0.58	0.05				Shu et al. (2023)
Cenozoic alkali basalts from East Asia	13PMS8	-0.6	0.05	0.6	0.04				Shu et al. (2023)
Cenozoic alkali basalts from East Asia	13AFS1	-0.52	0.04	0.58	0.03				Shu et al. (2023)
Cenozoic alkali basalts from East Asia	13AFS2	-0.52	0.08	0.57	0.05				Shu et al. (2023)
Cenozoic alkali basalts from East Asia	13AFS3	-0.59	0.04	0.63	0.05				Shu et al. (2023)
Cenozoic alkali basalts from East Asia	13AFS4	-0.56	0.04	0.59	0.04				Shu et al. (2023)
Cenozoic alkali basalts from East Asia	10FS6	-0.41	0.07	0.43	0.03				Shu et al. (2023)
Cenozoic alkali basalts from East Asia	10FS8	-0.42	0.05	0.42	0.05				Shu et al. (2023)
Cenozoic alkali basalts from East Asia	10FS9	-0.43	0.05	0.43	0.04				Shu et al. (2023)
Cenozoic alkali basalts from East Asia	10FS10	-0.42	0.04	0.48	0.04				Shu et al. (2023)
Cenozoic alkali basalts from East Asia	10FS11	-0.4	0.03	0.4	0.05				Shu et al. (2023)
Cenozoic alkali basalts from East Asia	10CR1	-0.37	0.05	0.42	0.04				Shu et al. (2023)
Cenozoic alkali basalts from East Asia	10CR2	-0.35	0.06	0.36	0.05				Shu et al. (2023)
Cenozoic alkali basalts from East Asia	10LYSK-10			0.45	0.03				Shu et al. (2023)
Cenozoic alkali basalts from East Asia	10LYSK-11			0.43	0.05				Shu et al. (2023)
Cenozoic alkali basalts from East Asia	10LYSK-12			0.48	0.05				Shu et al. (2023)
Cenozoic alkali basalts from East Asia	10LYSK-13	-0.41	0.05	0.44	0.03				Shu et al. (2023)
Cenozoic alkali basalts from East Asia	15TS-3B	-0.36	0.01						Shu et al. (2023)
Cenozoic alkali basalts from East Asia	15TS-4B	-0.43	0.03						Shu et al. (2023)
Cenozoic alkali basalts from East Asia	15PSS-1B	-0.41	0.02	0.48	0.04				Shu et al. (2023)
Cenozoic alkali basalts from East Asia	15PSS-3B	-0.4	0.01						Shu et al. (2023)
Cenozoic alkali basalts from East Asia	15PSS-2	-0.36	0.02	0.5	0.01				Shu et al. (2023)
Cenozoic alkali basalts from East Asia	15PSS-10	-0.44	0.05						Shu et al. (2023)
Cenozoic alkali basalts from East Asia	15TS-5	-0.38	0.04	0.47	0.01				Shu et al. (2023)
Cenozoic alkali basalts from East Asia	15TS-6	-0.46	0.03	0.46	0.06				Shu et al. (2023)
Cenozoic alkali basalts from East Asia	XC-B-11-1	-0.38	0.04	0.37	0.05				Shu et al. (2023)
Cenozoic alkali basalts from East Asia	XC-B-11-2	-0.34	0.02						Shu et al. (2023)
Cenozoic alkali basalts from East Asia	ZJ12GP-2	-0.36	0.01						Shu et al. (2023)
Cenozoic alkali basalts from East Asia	QZ-11-3	-0.35	0.05						Shu et al. (2023)
Cenozoic alkali basalts from East Asia	QZ-11-4	-0.32	0.01	0.48	0.01				Shu et al. (2023)
Cenozoic alkali basalts from East Asia	QZ-11-5	-0.37	0.07	0.46	0.01				Shu et al. (2023)
Cenozoic alkali basalts from East Asia	ZJ12XL-2	-0.34	0.04	0.45	0.05				Shu et al. (2023)
Cenozoic alkali basalts from East Asia	ZJ12XL-12	-0.34	0.02						Shu et al. (2023)
Cenozoic alkali basalts from East Asia	ZJ12XL-17	-0.32	0.05						Shu et al. (2023)
Cenozoic alkali basalts from East Asia	MX-C-11-4	-0.47	0.02	0.35	0.01				Shu et al. (2023)
Cenozoic alkali basalts from East Asia	MX-A-11-1	-0.28	0.01	0.41	0.01				Shu et al. (2023)
Cenozoic alkali basalts from East Asia	MX-A-11-2	-0.29	0.02						Shu et al. (2023)
Cenozoic alkali basalts from East Asia	MX-A-11-3	-0.31	0.03						Shu et al. (2023)
Cenozoic alkali basalts from East Asia	MX-B-11-3	-0.32	0.02	0.38	0.02				Shu et al. (2023)
Cenozoic alkali basalts from East Asia	MX-B-11-4	-0.31	0.01						Shu et al. (2023)
Cenozoic alkali basalts from East Asia	FJ12MX-B-1	-0.32	0.01	0.39	0.05				Shu et al. (2023)
Cenozoic alkali basalts from East Asia	FJ12MX-B-2	-0.3	0.04						Shu et al. (2023)
Cenozoic alkali basalts from East Asia	15LS-2	-0.39	0.01	0.43	0.04				Shu et al. (2023)
Cenozoic alkali basalts from East Asia	15LS-3	-0.42	0.03						Shu et al. (2023)
Cenozoic alkali basalts from East Asia	XC-B-11-4	-0.37	0.06						Shu et al. (2023)
Cenozoic alkali basalts from East Asia	ZJ12GP-1	-0.37	0.03	0.38	0.02				Shu et al. (2023)
Cenozoic alkali basalts from East Asia	ZJ12GP-3	-0.35	0.04						Shu et al. (2023)
Cenozoic alkali basalts from East Asia	XC-A-11-3	-0.33	0.03	0.35	0.05				Shu et al. (2023)
Cenozoic alkali basalts from East Asia	XC-A-11-4	-0.35	0.03						Shu et al. (2023)
Cenozoic alkali basalts from East Asia	ZJ12SC-2	-0.29	0.05	0.34	0.02				Shu et al. (2023)
Cenozoic alkali basalts from East Asia	ZJ12SJ-1	-0.32	0.01	0.35	0.02				Shu et al. (2023)
Cenozoic alkali basalts from East Asia	ZJ12SJ-3	-0.34	0.02						Shu et al. (2023)
Cenozoic alkali basalts from East Asia	ZJ12SJ-6	-0.33	0.04						Shu et al. (2023)
Cenozoic alkali basalts from East Asia	BL-11-1	-0.31	0.01	0.35	0.01				Shu et al. (2023)
Cenozoic alkali basalts from East Asia	BL-11-2	-0.31	0.02						Shu et al. (2023)
Cenozoic alkali basalts from East Asia	BL-11-4	-0.28	0.01						Shu et al. (2023)
Cenozoic alkali basalts from East Asia	BL-11-5	-0.32	0.05						Shu et al. (2023)
Cenozoic alkali basalts from East Asia	FJ12BL-1-1	-0.32	0.05	0.38	0.01				Shu et al. (2023)
Cenozoic alkali basalts from East Asia	FJ12BL-1-2	-0.33	0.01						Shu et al. (2023)
Cenozoic alkali basalts from East Asia	FJ12BL-2-2	-0.33	0.07						Shu et al. (2023)
Cenozoic alkali basalts from East Asia	FJ12BL-3-3	-0.32	0.03						Shu et al. (2023)
Cenozoic alkali basalts from East Asia	MX-C-11-2	-0.41	0.02	0.33	0.03				Shu et al. (2023)
Cenozoic alkali basalts from East Asia	MX-C-11-3	-0.45	0.04						Shu et al. (2023)
Cenozoic alkali basalts from East Asia	FS-1	-0.44	0.04						Shu et al. (2023)
Cenozoic alkali basalts from East Asia	FS-8	-0.46	0.04						Shu et al. (2023)
Cenozoic alkali basalts from East Asia	FS-10	-0.46	0.04						Shu et al. (2023)
Cenozoic alkali basalts from East Asia	FS-30	-0.44	0.04						Shu et al. (2023)
Cenozoic alkali basalts from East Asia	FS-32	-0.49	0.04						Shu et al. (2023)
Cenozoic alkali basalts from East Asia	FS-33	-0.48	0.04						Shu et al. (2023)
Cenozoic alkali basalts from East Asia	HHL-1	-0.43	0.04						Shu et al. (2023)
Cenozoic alkali basalts from East Asia	HHL-2	-0.52	0.06						Shu et al. (2023)
Cenozoic alkali basalts from East Asia	FS-2	-0.3	0.06						Shu et al. (2023)
Cenozoic alkali basalts from East Asia	FS-3	-0.53	0.06						Shu et al. (2023)
Cenozoic alkali basalts from East Asia	FS-9	-0.46	0.06						Shu et al. (2023)
Cenozoic alkali basalts from East Asia	FS-36	-0.51	0.06						Shu et al. (2023)
Cenozoic alkali basalts from East Asia	FS-38	-0.45	0.06						Shu et al. (2023)
Cenozoic alkali basalts from East Asia	FHS-1	-0.44	0.07						Shu et al. (2023)
Cenozoic alkali basalts from East Asia	GB-2	-0.5	0.07	0.42	0.03				Shu et al. (2023)
Cenozoic alkali basalts from East Asia	JD-1	-0.46	0.07	0.42	0.03				Shu et al. (2023)
Cenozoic alkali basalts from East Asia	JX-1	-0.49	0.07	0.44	0.05				Shu et al. (2023)
Cenozoic alkali basalts from East Asia	JX-3	-0.46	0.07						Shu et al. (2023)
Cenozoic alkali basalts from East Asia	MAS-1	-0.54	0.07						Shu et al. (2023)
Cenozoic alkali basalts from East Asia	ZQ-1	-0.42	0.07	0.35	0.05				Shu et al. (2023)
Cenozoic alkali basalts from East Asia	ZQ-4	-0.42	0.07						Shu et al. (2023)
Casalini, M., Avanzinelli, R., Tommasini, S., Elliott, T., and Conticelli, S., 2019, Ce/Mo and Molybdenum Isotope Systematics in Subduction‐Related Orogenic Potassic Magmas of Central‐Southern Italy: Geochemistry, Geophysics, Geosystems, v. 20, p. 2753-2768, 10.1029/2019gc008193.
Fan, J.-J., Wang, Q., Li, J., Wei, G.-J., Ma, J.-L., Ma, L., Li, Q.-W., Jiang, Z.-Q., Zhang, L., Wang, Z.-L., and Zhang, L., 2021, Boron and molybdenum isotopic fractionation during crustal anatexis: Constraints from the Conadong leucogranites in the Himalayan Block, South Tibet: Geochimica et Cosmochimica Acta, v. 297, p. 120-142, https://doi.org/10.1016/j.gca.2021.01.005.
Huang, F., Li, J., Xu, J., Chen, J., Wang, B., Hu, P., Xu, R., Zeng, Y., Zhang, L., and Zhou, T., 2023, Mo isotopes archive oceanic sediments in post-orogenic lithospheric mantle: Geochimica et Cosmochimica Acta, v. 341, p. 75-89, https://doi.org/10.1016/j.gca.2022.11.023.
Li, H.-Y., Li, J., Ryan, J. G., Li, X., Zhao, R.-P., Ma, L., and Xu, Y.-G., 2019, Molybdenum and boron isotope evidence for fluid-fluxed melting of intraplate upper mantle beneath the eastern North China Craton: Earth and Planetary Science Letters, v. 520, p. 105-114, 10.1016/j.epsl.2019.05.038.
Liu, D., Zhao, Z., Zhu, D.-C., Niu, Y., Widom, E., Teng, F.-Z., DePaolo, D. J., Ke, S., Xu, J.-F., Wang, Q., and Mo, X., 2015, Identifying mantle carbonatite metasomatism through Os–Sr–Mg isotopes in Tibetan ultrapotassic rocks: Earth and Planetary Science Letters, v. 430, p. 458-469, https://doi.org/10.1016/j.epsl.2015.09.005.
Liu, S. A., Wang, Z. Z., Yang, C., Li, S. G., and Ke, S., 2020, Mg and Zn isotope evidence for two types of mantle metasomatism and deep recycling of magnesium carbonates: Journal of Geophysical Research: Solid Earth, v. 125, p. e2020JB020684, https://doi.org/10.1029/2020jb020684.
Shu, Z.-T., Liu, S.-A., Prelević, D., Wang, Y., Foley, S. F., Cvetković, V., and Li, S., 2023, Recycled carbonate-bearing silicate sediments in the sources of Circum-Mediterranean K-rich lavas: Evidence from Mg-Zn isotopic decoupling: Journal of Geophysical Research: Solid Earth, v. 128, p. e2022JB025135, https://doi.org/10.1029/2022JB025135.
Wang, Z.-Z., and Liu, S.-A., 2021, Evolution of Intraplate Alkaline to Tholeiitic Basalts via Interaction Between Carbonated Melt and Lithospheric Mantle: Journal of Petrology, v. 62, 10.1093/petrology/egab025.
Wang, Z.-Z., Liu, S.-A., Chen, L.-H., Li, S.-G., and Zeng, G., 2018, Compositional transition in natural alkaline lavas through silica-undersaturated melt–lithosphere interaction: Geology, v. 46, p. 771-774, 10.1130/g45145.1.
Wang, Z.-Z., Liu, S.-A., Liu, J., Huang, J., Xiao, Y., Chu, Z.-Y., Zhao, X.-M., and Tang, L., 2017, Zinc isotope fractionation during mantle melting and constraints on the Zn isotope composition of Earth’s upper mantle: Geochimica et Cosmochimica Acta, v. 198, p. 151–167, https://doi.org/10.1016/j.gca.2016.11.014.
Zhang, M.-Y., Huang, C.-C., Hao, L.-L., Qi, Y., Wang, Q., Kerr, A. C., Wei, G.-J., Li, J., Ma, J.-L., Ma, L., and Fan, J.-J., 2023, Light Mo isotopes of post-collisional ultrapotassic rocks in southern Tibet derived from subducted Indian continental crust: Geochemistry, Geophysics, Geosystems, v. 24, p. e2023GC011053, https://doi.org/10.1029/2023GC011053.

## Sheet: Table S7
Table S7. Trace element and isotope data for end-members used in Mg-Zn-Mo-Sr geochemical modeling.
Geochemical end-members	δ26Mg (‰)	MgO (wt.%)	δ66Zn (‰)	Zn (ppm)	δ98Mo (‰)	Mo (ppm)	87Sr/86Sr	Sr (ppm)
MORB1	-0.25	7.58	0.27	91.3	-0.14	0.46	0.7028	129
Calcite2	-3	0.8	0.91	20	-1	1.48	0.7088	1311
Dolomite2	-2	22	0.91	132	-1	1.48	0.7099	1151
Magnesite2	-1	40	0.91	449	-1	1.48	0.7164	1.84
Indian continental crust3	0.13	2.48	0.34	67	0.2	1.1	0.749	320
1Data source: δ26Mg (Teng et al., 2017); δ66Zn (Wang et al., 2017; Pickard et al., 2022; Sun et al., 2023); δ98Mo (Bezard et al., 2016; Liang et al., 2017; Chen et al., 2022); MgO, Zn, Mo, 87Sr/86Sr and Sr (Gale et al., 2013).
2Data source: δ26Mg, MgO, δ66Zn, Zn, 87Sr/86Sr and Sr (Li et al., 2017; Liu et al., 2022, and references therein); δ98Mo (we assume that the Mo isotope fractionation caused by the dehydration of subducting oceanic and
continental crust is similar, and thus sediment melts derived from dehydrated continental crust have δ98Mo similar to melts derived from oceanic eclogite, the values of which range from -1.01‰ to -0.13‰) (Chen et al., 2019;
Ahmad et al., 2021; Fang et al., 2022); Mo (Voegelin et al., 2009; Romaniello et al., 2016; Lin et al., 2021).
3Data source: δ26Mg and δ66Zn (Wang et al., 2020); δ98Mo (Fan et al., 2021); 87Sr/86Sr (Guo et al., 2021); MgO, Zn, Mo and Sr (Rudnick and Gao, 2014).
Ahmad, Q., Wille, M., König, S., Rosca, C., Hensel, A., Pettke, T., and Hermann, J., 2021, The Molybdenum isotope subduction recycling conundrum: A case study from the Tongan subduction zone, Western Alps and Alpine Corsica: Chemical Geology, v. 576, 10.1016/j.chemgeo.2021.120231.
Bezard, R., Fischer-Gödde, M., Hamelin, C., Brennecka, G. A., and Kleine, T., 2016, The effects of magmatic processes and crustal recycling on the molybdenum stable isotopic composition of Mid-Ocean Ridge Basalts: Earth and Planetary Science Letters, v. 453, p. 171−181. https://doi.org/10.1016/j.epsl.2016.07.056.
Chen, S., Hin, R. C., John, T., Brooker, R., Bryan, B., Niu, Y., and Elliott, T., 2019, Molybdenum systematics of subducted crust record reactive fluid flow from underlying slab serpentine dehydration: Nature Communications, v. 10, p. 4773, https://doi.org/10.1038/s41467-019-12696-3.
Chen, S., Sun, P., Niu, Y., Guo, P., Elliott, T., and Hin, R. C., 2022, Molybdenum isotope systematics of lavas from the East Pacific Rise: Constraints on the source of enriched mid-ocean ridge basalt: Earth and Planetary Science Letters, v. 578, p. 117283, https://doi.org/10.1016/j.epsl.2021.117283.
Fan, J.-J., Wang, Q., Li, J., Wei, G.-J., Ma, J.-L., Ma, L., Li, Q.-W., Jiang, Z.-Q., Zhang, L., Wang, Z.-L., and Zhang, L., 2021, Boron and molybdenum isotopic fractionation during crustal anatexis: Constraints from the Conadong leucogranites in the Himalayan Block, South Tibet: Geochimica et Cosmochimica Acta, v. 297, p. 120-142, https://doi.org/10.1016/j.gca.2021.01.005.
Fang, W., Dai, L.-Q., Zheng, Y.-F., and Zhao, Z.-F., 2022, Basalt Mo isotope evidence for crustal recycling in continental subduction zone: Geochimica et Cosmochimica Acta, v. 334, p. 273-292, https://doi.org/10.1016/j.gca.2022.08.008.
Gale, A., Dalton, C. A., Langmuir, C. H., Su, Y., and Schilling, J.-G., 2013, The mean composition of ocean ridge basalts: Geochemistry, Geophysics, Geosystems, v. 14, p. 489–518, https://doi.org/10.1029/2012GC004334.
Guo, Z., Wilson, M., Dingwell, D. B., and Liu, J., 2021, India-Asia collision as a driver of atmospheric CO2 in the Cenozoic: Nature Communications, v. 12, p. 3891, https://doi.org/10.1038/s41467-021-23772-y.
Li, S.-G., Yang, W., Ke, S., Meng, X., Tian, H., Xu, L., He, Y., Huang, J., Wang, X.-C., Xia, Q., Sun, W., Yang, X., Ren, Z.-Y., Wei, H., Liu, Y., Meng, F., and Yan, J., 2017, Deep carbon cycles constrained by a large-scale mantle Mg isotope anomaly in eastern China: National Science Review, v. 4, p. 111-120, https://doi.org/10.1093/nsr/nww070.
Liang, Y.-H., Halliday, A. N., Siebert, C., Fitton, J. G., Burton, K. W., Wang, K.-L., and Harvey, J., 2017, Molybdenum isotope fractionation in the mantle. Geochimica et Cosmochimica Acta, v. 199, p. 91–111, https://doi.org/10.1016/j.gca.2016.11.023.
Lin, Z., Sun, X., Strauss, H., Eroglu, S., Böttcher, M. E., Lu, Y., Liang, J., Li, J., and Peckmann, J., 2021, Molybdenum isotope composition of seep carbonates – Constraints on sediment biogeochemistry in seepage environments: Geochimica et Cosmochimica Acta, v. 307, p. 56–71, https://doi.org/10.1016/j.gca.2021.05.038.
Liu, S.-A., Qu, Y.-R., Wang, Z.-Z., Li, M.-L., Yang, C., and Li, S.-G., 2022, The fate of subducting carbon tracked by Mg and Zn isotopes: A review and new perspectives: Earth-Science Reviews, v. 228, p. 104010, https://doi.org/10.1016/j.earscirev.2022.104010.
Pichat, S., Douchet, C., and Albarède, F., 2003, Zinc isotope variations in deep-sea carbonates from the eastern equatorial Pacific over the last 175 ka: Earth and Planetary Science Letters, v. 210, p. 167–178, https://doi.org/10.1016/S0012-821X(03)00106-7.
Romaniello, S. J., Herrmann, A. D., and Anbar, A. D., 2016, Syndepositional diagenetic control of molybdenum isotope variations in carbonate sediments from the Bahamas: Chemical Geology, v. 438, p. 84–90, https://doi.org/10.1016/j.chemgeo.2016.05.019.
Rudnick, R.L., and Gao, S., 2003, Composition of the continental crust, in Holland, H.D., and Turekian, K.K., eds., Treatise on Geochemistry, Volume 3. The Crust: Amsterdam, Netherlands, Elsevier, 1–64.
Sun, P., Niu, Y., Duan, M., Chen, S., Guo, P., Gong, H., Xiao, Y., and Wang, X., 2023, Zinc isotope fractionation during mid-ocean ridge basalt differentiation: Evidence from lavas on the East Pacific Rise at 10°30’N: Geochimica et Cosmochimica Acta, v. 346, p. 180–191, https://doi.org/10.1016/j.gca.2023.02.012.
Teng, F.-Z., 2017, Magnesium Isotope Geochemistry: Reviews in Mineralogy and Geochemistry, v. 82, p. 219-287, https://doi.org/10.2138/rmg.2017.82.7.
Voegelin, A. R., Nägler, T. F., Samankassou, E., and Villa, I. M., 2009, Molybdenum isotopic composition of modern and Carboniferous carbonates: Chemical Geology, 265, 488–498, https://doi.org/10.1016/j.chemgeo.2009.05.015.
Wang, Z.-Z., Liu, S.-A., Liu, J., Huang, J., Xiao, Y., Chu, Z.-Y., Zhao, X.-M., and Tang, L., 2017, Zinc isotope fractionation during mantle melting and constraints on the Zn isotope composition of Earth’s upper mantle: Geochimica et Cosmochimica Acta, v. 198, p. 151–167, https://doi.org/10.1016/j.gca.2016.11.014.
Wang, Z.-Z., Liu, S.-A., Liu, Z.-C., Zheng, Y.-C., and Wu, F.-Y., 2020, Extreme Mg and Zn isotope fractionation recorded in the Himalayan leucogranites: Geochimica et Cosmochimica Acta, v. 278, p. 305-321, https://doi.org/10.1016/j.gca.2019.09.026.

## Sheet: Table S8
Table S8. Parameter definitions and value ranges used in Monte Carlo modeling.
Definition	Symbol	Values	Values-min	Values-max
Length of the region (km)	α	600
Width of the region (km)	β	300
Thickness of the metasomatized lithospheric mantle (km)	Χ		1	80
Percentage by area of the mantle that has been metasomatized (%)	γ		0.1	0.5
Mass fraction of carbonate-bearing sediment melts (%)	λ		0	0.5
Proportion of carbonates in the carbonate-bearing sediments (%)	ωc		0.1	0.5
Mass fraction of C in carbonates (%)	ωcc	0.12
Density of carbonate melts in the upper mantle (g/km3)	ρ	2400000000000000
Initial eruption age of the K-rich magmas (yr)	μ	8300000
Recycling efficiency of subducted carbon	ε		0.6	0.9
Input flux of recycled carbon into the mantle (Mt/yr)	Minput
Output flux of CO2 into the atmosphere (Mt/yr)	Moutput

## Sheet: Table S9
Table S9. Monte Carlo modeling for evaluating the input flux of recycled carbon (elemental C) into the lithospheric mantle and output flux of volcianc CO2 emission into the atmosphere.
N	α	β	Χ	γ	λ	ωc	ωcc	ρ	μ	ε	Minput	Moutput		average input C (Mt/yr)	average output CO2 (Mt/yr)
1	600	300	25.4327	0.418929	0.383811	0.248046	0.12	2400000000000000	8300000	0.895791	6.33533	20.8088		5.62328	15.4771
2	600	300	49.8449	0.445559	0.488735	0.162082	0.12	2400000000000000	8300000	0.794762	10.9881	32.0206
3	600	300	23.0879	0.189662	0.471003	0.420483	0.12	2400000000000000	8300000	0.830701	5.41657	16.4984	SD	6.54799	18.3591
4	600	300	77.3211	0.27175	0.0584526	0.402149	0.12	2400000000000000	8300000	0.859568	3.08493	9.72292	95%CI(+)	5.80478	15.986
5	600	300	52.295	0.21758	0.262029	0.379612	0.12	2400000000000000	8300000	0.647319	7.06896	16.7782	95%CI(-)	5.46238	15.034
6	600	300	26.2637	0.1219	0.498858	0.103397	0.12	2400000000000000	8300000	0.840177	1.03141	3.1774
7	600	300	53.0578	0.164504	0.147823	0.282094	0.12	2400000000000000	8300000	0.897703	2.27326	7.48261
8	600	300	76.1098	0.494834	0.217934	0.17003	0.12	2400000000000000	8300000	0.796291	8.71642	25.4496
9	600	300	62.4188	0.304685	0.462309	0.414296	0.12	2400000000000000	8300000	0.87701	22.7507	73.1596
10	600	300	28.3494	0.278672	0.349547	0.250788	0.12	2400000000000000	8300000	0.891203	4.3255	14.1346
11	600	300	69.0642	0.165943	0.228305	0.476053	0.12	2400000000000000	8300000	0.70376	7.77981	20.0754
12	600	300	3.0263	0.208524	0.250661	0.11262	0.12	2400000000000000	8300000	0.88246	0.111265	0.360017
13	600	300	5.28658	0.493803	0.233235	0.102414	0.12	2400000000000000	8300000	0.799407	0.389463	1.14158
14	600	300	26.7567	0.473573	0.157104	0.262336	0.12	2400000000000000	8300000	0.726905	3.26176	8.69363
15	600	300	5.28578	0.303864	0.353222	0.292321	0.12	2400000000000000	8300000	0.689213	1.03582	2.61763
16	600	300	18.7435	0.230681	0.167438	0.185048	0.12	2400000000000000	8300000	0.855638	0.836738	2.62513
17	600	300	18.2664	0.491905	0.482749	0.148795	0.12	2400000000000000	8300000	0.766115	4.03118	11.3239
18	600	300	22.3305	0.290628	0.275257	0.27355	0.12	2400000000000000	8300000	0.622232	3.0521	6.96342
19	600	300	19.6023	0.125627	0.320994	0.26084	0.12	2400000000000000	8300000	0.813634	1.28779	3.84191
20	600	300	15.1175	0.355486	0.402952	0.434661	0.12	2400000000000000	8300000	0.748972	5.87887	16.1447
21	600	300	33.6282	0.119295	0.0508776	0.355886	0.12	2400000000000000	8300000	0.735653	0.453679	1.22375
22	600	300	16.6109	0.207764	0.0188609	0.184462	0.12	2400000000000000	8300000	0.697897	0.0749931	0.191904
23	600	300	37.5813	0.126083	0.0214012	0.346091	0.12	2400000000000000	8300000	0.861573	0.219202	0.69248
24	600	300	14.4452	0.241556	0.488557	0.185553	0.12	2400000000000000	8300000	0.774811	1.97566	5.61279
25	600	300	29.0568	0.41995	0.141498	0.197756	0.12	2400000000000000	8300000	0.843511	2.13261	6.59589
26	600	300	9.98751	0.281541	0.185435	0.241776	0.12	2400000000000000	8300000	0.83898	0.787392	2.42222
27	600	300	34.2414	0.174505	0.459358	0.460201	0.12	2400000000000000	8300000	0.622223	7.88941	17.9996
28	600	300	29.2261	0.319007	0.313574	0.1704	0.12	2400000000000000	8300000	0.850727	3.1115	9.70579
29	600	300	2.27344	0.322131	0.157208	0.178509	0.12	2400000000000000	8300000	0.747021	0.128362	0.351593
30	600	300	79.2448	0.291207	0.251559	0.402757	0.12	2400000000000000	8300000	0.662363	14.603	35.4658
31	600	300	28.1117	0.35451	0.262405	0.370034	0.12	2400000000000000	8300000	0.758984	6.04388	16.8198
32	600	300	28.1243	0.289715	0.21703	0.281059	0.12	2400000000000000	8300000	0.604156	3.10426	6.87667
33	600	300	46.1586	0.187144	0.198474	0.201686	0.12	2400000000000000	8300000	0.794572	2.15971	6.29216
34	600	300	32.5609	0.188206	0.430852	0.224856	0.12	2400000000000000	8300000	0.656195	3.70807	8.92179
35	600	300	73.8469	0.314833	0.388318	0.481368	0.12	2400000000000000	8300000	0.649715	27.1434	64.6634
36	600	300	77.369	0.398429	0.385558	0.171452	0.12	2400000000000000	8300000	0.76733	12.7274	35.809
37	600	300	44.3937	0.367071	0.347565	0.2182	0.12	2400000000000000	8300000	0.86915	7.71877	24.5988
38	600	300	76.099	0.155535	0.389139	0.254192	0.12	2400000000000000	8300000	0.698767	7.31241	18.7355
39	600	300	26.1807	0.156055	0.0441909	0.25551	0.12	2400000000000000	8300000	0.765258	0.288129	0.808475
40	600	300	16.949	0.301909	0.478368	0.264529	0.12	2400000000000000	8300000	0.759977	4.04428	11.2697
41	600	300	48.6693	0.180738	0.0819482	0.498637	0.12	2400000000000000	8300000	0.627993	2.245	5.16944
42	600	300	62.4423	0.342078	0.299849	0.472565	0.12	2400000000000000	8300000	0.616352	18.9041	42.7223
43	600	300	27.4764	0.137673	0.115279	0.228339	0.12	2400000000000000	8300000	0.869983	0.621909	1.98385
44	600	300	30.4149	0.256691	0.30574	0.414525	0.12	2400000000000000	8300000	0.624948	6.17998	14.1613
45	600	300	68.8378	0.301398	0.26654	0.368322	0.12	2400000000000000	8300000	0.758388	12.7217	35.3759
46	600	300	2.33474	0.346553	0.277614	0.233897	0.12	2400000000000000	8300000	0.633629	0.328142	0.762375
47	600	300	31.7017	0.205125	0.477784	0.150707	0.12	2400000000000000	8300000	0.888182	2.9245	9.52411
48	600	300	68.5871	0.104116	0.425887	0.155273	0.12	2400000000000000	8300000	0.796341	2.94943	8.61209
49	600	300	77.0718	0.382597	0.368887	0.425642	0.12	2400000000000000	8300000	0.806516	28.9176	85.5158
50	600	300	75.5103	0.142452	0.294237	0.277841	0.12	2400000000000000	8300000	0.696833	5.49232	14.0332
51	600	300	41.0536	0.489597	0.283803	0.187848	0.12	2400000000000000	8300000	0.800005	6.69268	19.632
52	600	300	1.22791	0.114252	0.185642	0.179233	0.12	2400000000000000	8300000	0.617893	0.0291548	0.0660534
53	600	300	29.1431	0.129824	0.158204	0.441996	0.12	2400000000000000	8300000	0.802838	1.65238	4.86418
54	600	300	18.5171	0.424922	0.147233	0.430057	0.12	2400000000000000	8300000	0.868614	3.11173	9.91061
55	600	300	32.0824	0.170557	0.202462	0.408697	0.12	2400000000000000	8300000	0.744903	2.82792	7.72393
56	600	300	35.6962	0.120184	0.254196	0.145627	0.12	2400000000000000	8300000	0.897028	0.991899	3.26246
57	600	300	61.6133	0.488586	0.0836654	0.482263	0.12	2400000000000000	8300000	0.821145	7.58634	22.8415
58	600	300	14.2082	0.266603	0.269369	0.126107	0.12	2400000000000000	8300000	0.889046	0.803668	2.61982
59	600	300	30.3853	0.376987	0.240927	0.42745	0.12	2400000000000000	8300000	0.744659	7.36797	20.1176
60	600	300	15.1129	0.268775	0.239147	0.244618	0.12	2400000000000000	8300000	0.824322	1.48415	4.48586
61	600	300	58.0985	0.313499	0.223551	0.145937	0.12	2400000000000000	8300000	0.631986	3.71133	8.60019
62	600	300	27.3075	0.343036	0.132403	0.440766	0.12	2400000000000000	8300000	0.637284	3.4144	7.97846
63	600	300	79.6438	0.280699	0.444352	0.476075	0.12	2400000000000000	8300000	0.810975	29.5381	87.8337
64	600	300	67.7559	0.286073	0.0850274	0.109349	0.12	2400000000000000	8300000	0.781567	1.1256	3.22568
65	600	300	41.0185	0.451089	0.472599	0.410622	0.12	2400000000000000	8300000	0.778151	22.4266	63.9881
66	600	300	79.7016	0.482741	0.24037	0.475601	0.12	2400000000000000	8300000	0.602209	27.4721	60.6612
67	600	300	32.0251	0.349826	0.116198	0.42499	0.12	2400000000000000	8300000	0.895521	3.45547	11.3463
68	600	300	13.8991	0.230995	0.297677	0.194616	0.12	2400000000000000	8300000	0.833016	1.16171	3.54833
69	600	300	1.06372	0.264537	0.0570634	0.341069	0.12	2400000000000000	8300000	0.880796	0.034206	0.110471
70	600	300	40.3779	0.425466	0.299324	0.468284	0.12	2400000000000000	8300000	0.670935	15.04	36.9998
71	600	300	67.6053	0.442794	0.11126	0.408585	0.12	2400000000000000	8300000	0.75513	8.49945	23.5334
72	600	300	47.5615	0.177958	0.391916	0.424489	0.12	2400000000000000	8300000	0.846722	8.79463	27.3042
73	600	300	67.7181	0.263988	0.188714	0.251781	0.12	2400000000000000	8300000	0.781606	5.30521	15.2041
74	600	300	31.2576	0.361101	0.381005	0.449685	0.12	2400000000000000	8300000	0.899911	12.0784	39.8549
75	600	300	37.0376	0.462289	0.00685966	0.422706	0.12	2400000000000000	8300000	0.734564	0.310087	0.835188
76	600	300	27.3369	0.319683	0.0862013	0.246136	0.12	2400000000000000	8300000	0.883404	1.15809	3.75123
77	600	300	77.8559	0.225625	0.0846585	0.166305	0.12	2400000000000000	8300000	0.773457	1.54469	4.38075
78	600	300	72.8908	0.418223	0.0943495	0.169493	0.12	2400000000000000	8300000	0.76104	3.0448	8.49645
79	600	300	20.1084	0.264828	0.265054	0.338236	0.12	2400000000000000	8300000	0.605778	2.98182	6.62318
80	600	300	62.003	0.18696	0.134298	0.209207	0.12	2400000000000000	8300000	0.770437	2.0342	5.74649
81	600	300	3.25544	0.281821	0.169649	0.135314	0.12	2400000000000000	8300000	0.786626	0.131542	0.379406
82	600	300	28.4215	0.337607	0.345211	0.37101	0.12	2400000000000000	8300000	0.859204	7.67565	24.1815
83	600	300	73.3334	0.252936	0.46024	0.282995	0.12	2400000000000000	8300000	0.722567	15.0891	39.9772
84	600	300	61.0151	0.100556	0.119995	0.114459	0.12	2400000000000000	8300000	0.775	0.526311	1.4956
85	600	300	27.9605	0.463762	0.23905	0.227032	0.12	2400000000000000	8300000	0.883163	4.39544	14.2336
86	600	300	66.5197	0.446206	0.221693	0.306843	0.12	2400000000000000	8300000	0.856652	12.6107	39.6111
87	600	300	65.9309	0.235253	0.0208146	0.153436	0.12	2400000000000000	8300000	0.66729	0.309389	0.756992
88	600	300	50.8569	0.100765	0.214789	0.410353	0.12	2400000000000000	8300000	0.847789	2.82109	8.76954
89	600	300	43.9171	0.376055	0.271658	0.307239	0.12	2400000000000000	8300000	0.623884	8.60936	19.6946
90	600	300	35.9369	0.346446	0.169523	0.450973	0.12	2400000000000000	8300000	0.669107	5.94489	14.5852
91	600	300	29.5073	0.167199	0.192992	0.377481	0.12	2400000000000000	8300000	0.63156	2.24484	5.19842
92	600	300	6.63049	0.415868	0.0728697	0.362845	0.12	2400000000000000	8300000	0.879253	0.455361	1.46805
93	600	300	58.0093	0.425897	0.255119	0.265424	0.12	2400000000000000	8300000	0.691817	10.4489	26.5054
94	600	300	69.997	0.193826	0.485565	0.366383	0.12	2400000000000000	8300000	0.726743	15.0751	40.1711
95	600	300	56.58	0.411038	0.161526	0.24087	0.12	2400000000000000	8300000	0.600155	5.6514	12.4363
96	600	300	1.06953	0.113452	0.315279	0.249195	0.12	2400000000000000	8300000	0.628293	0.0595421	0.13717
97	600	300	38.8516	0.297154	0.0507658	0.137362	0.12	2400000000000000	8300000	0.727714	0.502821	1.34167
98	600	300	50.299	0.426499	0.121369	0.413284	0.12	2400000000000000	8300000	0.635045	6.72082	15.6494
99	600	300	25.6175	0.221392	0.294945	0.379719	0.12	2400000000000000	8300000	0.856791	3.96725	12.4634
100	600	300	35.312	0.439617	0.385358	0.491832	0.12	2400000000000000	8300000	0.816688	18.3766	55.0291
101	600	300	17.0353	0.476435	0.350279	0.415129	0.12	2400000000000000	8300000	0.792172	7.37119	21.4106
102	600	300	59.2813	0.117381	0.466432	0.330297	0.12	2400000000000000	8300000	0.607841	6.6957	14.923
103	600	300	27.7092	0.341818	0.365598	0.329668	0.12	2400000000000000	8300000	0.681714	7.12997	17.8222
104	600	300	1.36722	0.290295	0.277487	0.221534	0.12	2400000000000000	8300000	0.617345	0.152388	0.344945
105	600	300	30.8767	0.108499	0.44427	0.102346	0.12	2400000000000000	8300000	0.775548	0.951397	2.70546
106	600	300	27.7506	0.237234	0.0240859	0.161328	0.12	2400000000000000	8300000	0.729831	0.159775	0.427566
107	600	300	41.0278	0.457253	0.280366	0.107916	0.12	2400000000000000	8300000	0.8579	3.54513	11.1517
108	600	300	32.2766	0.3172	0.0277257	0.142686	0.12	2400000000000000	8300000	0.864684	0.252971	0.802045
109	600	300	10.9574	0.208321	0.25953	0.428905	0.12	2400000000000000	8300000	0.765723	1.58699	4.45572
110	600	300	25.6816	0.356929	0.402331	0.292234	0.12	2400000000000000	8300000	0.79028	6.73138	19.5055
111	600	300	71.79	0.419238	0.335111	0.403067	0.12	2400000000000000	8300000	0.630142	25.3909	58.6662
112	600	300	44.7375	0.375869	0.139142	0.176855	0.12	2400000000000000	8300000	0.663105	2.58446	6.28383
113	600	300	57.3159	0.406849	0.0811099	0.203533	0.12	2400000000000000	8300000	0.846321	2.40439	7.46125
114	600	300	59.5807	0.102165	0.376244	0.320386	0.12	2400000000000000	8300000	0.781156	4.58286	13.1264
115	600	300	25.485	0.213785	0.253086	0.335071	0.12	2400000000000000	8300000	0.754273	2.88571	7.98092
116	600	300	28.3774	0.228782	0.482665	0.211071	0.12	2400000000000000	8300000	0.876971	4.13101	13.2835
117	600	300	72.3989	0.147947	0.160054	0.382119	0.12	2400000000000000	8300000	0.804692	4.09156	12.0723
118	600	300	60.1436	0.277835	0.344122	0.30004	0.12	2400000000000000	8300000	0.796938	10.7759	31.4884
119	600	300	37.8135	0.299645	0.477126	0.127991	0.12	2400000000000000	8300000	0.643172	4.32172	10.1919
120	600	300	78.1665	0.103472	0.400257	0.332044	0.12	2400000000000000	8300000	0.820513	6.71376	20.1987
121	600	300	8.3878	0.139298	0.402827	0.460577	0.12	2400000000000000	8300000	0.727061	1.35395	3.60947
122	600	300	7.39211	0.322115	0.336129	0.21322	0.12	2400000000000000	8300000	0.689729	1.06586	2.69557
123	600	300	12.705	0.181116	0.485187	0.245736	0.12	2400000000000000	8300000	0.851079	1.71354	5.34733
124	600	300	73.7509	0.35682	0.161619	0.194756	0.12	2400000000000000	8300000	0.632705	5.17353	12.0022
125	600	300	44.0387	0.203346	0.208752	0.390073	0.12	2400000000000000	8300000	0.759435	4.55443	12.6823
126	600	300	75.2066	0.140145	0.105956	0.46307	0.12	2400000000000000	8300000	0.856409	3.22993	10.1425
127	600	300	7.39707	0.251987	0.158158	0.241707	0.12	2400000000000000	8300000	0.688579	0.445048	1.12365
128	600	300	30.3729	0.127512	0.351212	0.290192	0.12	2400000000000000	8300000	0.870564	2.46535	7.86958
129	600	300	38.858	0.403548	0.144848	0.272264	0.12	2400000000000000	8300000	0.759297	3.86247	10.7535
130	600	300	65.0241	0.226269	0.0929337	0.316353	0.12	2400000000000000	8300000	0.858368	2.70166	8.50308
131	600	300	38.1787	0.149287	0.215255	0.15655	0.12	2400000000000000	8300000	0.689742	1.19961	3.03387
132	600	300	12.4144	0.479621	0.0892176	0.464925	0.12	2400000000000000	8300000	0.758873	1.54257	4.29226
133	600	300	18.5255	0.318534	0.309294	0.200487	0.12	2400000000000000	8300000	0.653925	2.28545	5.47988
134	600	300	34.8547	0.192937	0.0353403	0.327294	0.12	2400000000000000	8300000	0.819295	0.485816	1.45943
135	600	300	44.3583	0.174925	0.230568	0.446368	0.12	2400000000000000	8300000	0.751225	4.98777	13.7388
136	600	300	47.4172	0.279273	0.0810779	0.110161	0.12	2400000000000000	8300000	0.780174	0.738725	2.11323
137	600	300	76.1706	0.153449	0.268925	0.263935	0.12	2400000000000000	8300000	0.874461	5.18161	16.6141
138	600	300	56.6648	0.33157	0.429106	0.121118	0.12	2400000000000000	8300000	0.829258	6.09888	18.5443
139	600	300	77.827	0.45447	0.0682349	0.438663	0.12	2400000000000000	8300000	0.720448	6.61241	17.4676
140	600	300	56.2235	0.408863	0.0678958	0.190876	0.12	2400000000000000	8300000	0.636206	1.8607	4.34056
141	600	300	27.5814	0.292733	0.12546	0.458034	0.12	2400000000000000	8300000	0.623421	2.89786	6.62415
142	600	300	56.7983	0.349259	0.0761327	0.351901	0.12	2400000000000000	8300000	0.731492	3.31942	8.90313
143	600	300	26.738	0.331525	0.0622882	0.112275	0.12	2400000000000000	8300000	0.602541	0.387186	0.855417
144	600	300	54.1199	0.148874	0.402515	0.13161	0.12	2400000000000000	8300000	0.737724	2.66583	7.21104
145	600	300	40.7651	0.270594	0.152751	0.224154	0.12	2400000000000000	8300000	0.663397	2.35899	5.73813
146	600	300	62.3095	0.156574	0.23642	0.417539	0.12	2400000000000000	8300000	0.605476	6.01508	13.354
147	600	300	62.4509	0.406389	0.0735057	0.312228	0.12	2400000000000000	8300000	0.633989	3.63798	8.45695
148	600	300	63.6406	0.284799	0.281312	0.493771	0.12	2400000000000000	8300000	0.680784	15.7244	39.2513
149	600	300	16.2028	0.429885	0.441455	0.47108	0.12	2400000000000000	8300000	0.726927	9.04711	24.1142
150	600	300	21.7551	0.440839	0.424105	0.336435	0.12	2400000000000000	8300000	0.783138	8.54675	24.5421
151	600	300	62.8543	0.273743	0.380159	0.1874	0.12	2400000000000000	8300000	0.869835	7.65594	24.4178
152	600	300	53.3234	0.134684	0.430385	0.118278	0.12	2400000000000000	8300000	0.782599	2.2834	6.55229
153	600	300	54.2881	0.324297	0.201095	0.219713	0.12	2400000000000000	8300000	0.864472	4.85837	15.3997
154	600	300	21.0007	0.371097	0.23243	0.283245	0.12	2400000000000000	8300000	0.845584	3.20452	9.93554
155	600	300	43.2931	0.107057	0.10502	0.181183	0.12	2400000000000000	8300000	0.638618	0.550818	1.28979
156	600	300	52.8955	0.32971	0.117133	0.383398	0.12	2400000000000000	8300000	0.796785	4.89176	14.2915
157	600	300	74.3845	0.234573	0.490043	0.43013	0.12	2400000000000000	8300000	0.642477	22.9711	54.1141
158	600	300	42.1559	0.294588	0.289493	0.440412	0.12	2400000000000000	8300000	0.611855	9.8891	22.1859
159	600	300	54.2922	0.257276	0.33292	0.271513	0.12	2400000000000000	8300000	0.73159	7.88594	21.154
160	600	300	67.0902	0.217648	0.4973	0.177576	0.12	2400000000000000	8300000	0.858436	8.05386	25.3503
161	600	300	43.4213	0.208267	0.226074	0.330856	0.12	2400000000000000	8300000	0.856246	4.22475	13.2639
162	600	300	50.7952	0.462756	0.257209	0.420321	0.12	2400000000000000	8300000	0.740474	15.8719	43.0934
163	600	300	6.75792	0.286433	0.0208692	0.325222	0.12	2400000000000000	8300000	0.779552	0.0820557	0.234545
164	600	300	57.9682	0.104838	0.32747	0.144246	0.12	2400000000000000	8300000	0.826495	1.79296	5.43353
165	600	300	17.9382	0.118552	0.247757	0.169392	0.12	2400000000000000	8300000	0.706103	0.55743	1.44321
166	600	300	51.564	0.370763	0.277848	0.485453	0.12	2400000000000000	8300000	0.812737	16.1058	47.996
167	600	300	73.4287	0.363799	0.0724559	0.126387	0.12	2400000000000000	8300000	0.829155	1.52788	4.64512
168	600	300	35.7335	0.455843	0.386153	0.233403	0.12	2400000000000000	8300000	0.657622	9.16947	22.1102
169	600	300	55.2064	0.489236	0.416324	0.202051	0.12	2400000000000000	8300000	0.614604	14.1902	31.9783
170	600	300	49.0618	0.261251	0.075372	0.462472	0.12	2400000000000000	8300000	0.716755	2.79051	7.33375
171	600	300	35.8772	0.423539	0.165692	0.418547	0.12	2400000000000000	8300000	0.636249	6.5818	15.3548
172	600	300	76.6057	0.139746	0.250235	0.259274	0.12	2400000000000000	8300000	0.860608	4.33806	13.689
173	600	300	14.5547	0.369096	0.0340593	0.114191	0.12	2400000000000000	8300000	0.603164	0.130496	0.288605
174	600	300	20.5783	0.250531	0.478914	0.112293	0.12	2400000000000000	8300000	0.89465	1.73168	5.68058
175	600	300	68.3625	0.396742	0.0332364	0.345063	0.12	2400000000000000	8300000	0.697283	1.94279	4.96713
176	600	300	46.4523	0.16585	0.228595	0.17765	0.12	2400000000000000	8300000	0.807892	1.95408	5.78852
177	600	300	24.6453	0.213638	0.425473	0.10935	0.12	2400000000000000	8300000	0.766878	1.53	4.30217
178	600	300	9.59996	0.472585	0.435047	0.387203	0.12	2400000000000000	8300000	0.804163	4.77322	14.0743
179	600	300	52.5406	0.428625	0.0566086	0.283768	0.12	2400000000000000	8300000	0.731847	2.25946	6.06313
180	600	300	47.8802	0.268216	0.488853	0.22357	0.12	2400000000000000	8300000	0.882851	8.76636	28.3778
181	600	300	30.0185	0.113181	0.452343	0.268126	0.12	2400000000000000	8300000	0.859562	2.57368	8.11154
182	600	300	16.6223	0.180255	0.489343	0.328677	0.12	2400000000000000	8300000	0.784074	3.00987	8.65321
183	600	300	43.2949	0.156695	0.191801	0.336958	0.12	2400000000000000	8300000	0.816809	2.73846	8.2016
184	600	300	54.9945	0.430927	0.244239	0.488667	0.12	2400000000000000	8300000	0.640193	17.666	41.4686
185	600	300	27.0664	0.444846	0.495917	0.469307	0.12	2400000000000000	8300000	0.618869	17.5022	39.7158
186	600	300	10.2159	0.232055	0.072221	0.201988	0.12	2400000000000000	8300000	0.829093	0.215994	0.656624
187	600	300	1.32895	0.469899	0.403823	0.302096	0.12	2400000000000000	8300000	0.607858	0.475814	1.0605
188	600	300	11.1132	0.293112	0.432927	0.41874	0.12	2400000000000000	8300000	0.642794	3.68826	8.69291
189	600	300	13.7355	0.415634	0.0489259	0.35719	0.12	2400000000000000	8300000	0.807544	0.62313	1.84509
190	600	300	20.8222	0.480452	0.211795	0.396095	0.12	2400000000000000	8300000	0.614407	5.24177	11.8088
191	600	300	7.57031	0.474614	0.19746	0.434257	0.12	2400000000000000	8300000	0.611703	1.92428	4.31598
192	600	300	64.29	0.202477	0.000370234	0.462701	0.12	2400000000000000	8300000	0.899323	0.0139278	0.0459272
193	600	300	6.25799	0.379295	0.499341	0.31735	0.12	2400000000000000	8300000	0.840047	2.34928	7.23618
194	600	300	67.837	0.49859	0.310902	0.425609	0.12	2400000000000000	8300000	0.699804	27.9532	71.7265
195	600	300	8.76417	0.156814	0.278538	0.313566	0.12	2400000000000000	8300000	0.668736	0.749714	1.83832
196	600	300	5.13568	0.393053	0.358337	0.349949	0.12	2400000000000000	8300000	0.800529	1.581	4.64067
197	600	300	74.6326	0.202398	0.26363	0.393814	0.12	2400000000000000	8300000	0.87809	9.79507	31.5369
198	600	300	44.9922	0.404011	0.33536	0.385209	0.12	2400000000000000	8300000	0.793043	14.6665	42.6476
199	600	300	68.4985	0.394007	0.406956	0.218595	0.12	2400000000000000	8300000	0.699115	14.9955	38.4397
200	600	300	37.9687	0.141305	0.439066	0.202885	0.12	2400000000000000	8300000	0.878846	2.98504	9.6191
201	600	300	69.5286	0.407874	0.155189	0.362998	0.12	2400000000000000	8300000	0.753764	9.97794	27.577
202	600	300	59.585	0.288169	0.304661	0.338618	0.12	2400000000000000	8300000	0.700234	11.0637	28.4062
203	600	300	30.4318	0.26035	0.426902	0.319913	0.12	2400000000000000	8300000	0.76423	6.75823	18.9378
204	600	300	56.4381	0.480044	0.0361992	0.40189	0.12	2400000000000000	8300000	0.737217	2.46177	6.65448
205	600	300	50.8189	0.13536	0.197972	0.401385	0.12	2400000000000000	8300000	0.735249	3.41404	9.20394
206	600	300	18.6393	0.425185	0.00148706	0.491855	0.12	2400000000000000	8300000	0.832161	0.0362042	0.110468
207	600	300	36.5088	0.26535	0.288806	0.165495	0.12	2400000000000000	8300000	0.855074	2.89199	9.06717
208	600	300	42.3291	0.490769	0.271179	0.492706	0.12	2400000000000000	8300000	0.800191	17.3359	50.8641
209	600	300	43.476	0.414908	0.361056	0.155132	0.12	2400000000000000	8300000	0.700864	6.31051	16.217
210	600	300	14.4167	0.268069	0.0798993	0.452964	0.12	2400000000000000	8300000	0.6964	0.873583	2.23067
211	600	300	75.6575	0.281123	0.359515	0.188817	0.12	2400000000000000	8300000	0.618117	9.01767	20.4379
212	600	300	64.2568	0.118819	0.361624	0.104101	0.12	2400000000000000	8300000	0.614143	1.79516	4.04246
213	600	300	39.3145	0.314202	0.260672	0.42067	0.12	2400000000000000	8300000	0.687648	8.46028	21.3315
214	600	300	58.0012	0.149938	0.264345	0.322102	0.12	2400000000000000	8300000	0.699186	4.62488	11.8567
215	600	300	3.8186	0.405899	0.280847	0.123635	0.12	2400000000000000	8300000	0.600747	0.336141	0.74043
216	600	300	39.2171	0.211572	0.0440592	0.148055	0.12	2400000000000000	8300000	0.647938	0.338051	0.803131
217	600	300	66.2888	0.284698	0.272812	0.422137	0.12	2400000000000000	8300000	0.675788	13.5746	33.6364
218	600	300	24.1202	0.338023	0.23948	0.41301	0.12	2400000000000000	8300000	0.658084	5.03667	12.1534
219	600	300	25.341	0.462741	0.208851	0.115175	0.12	2400000000000000	8300000	0.603816	1.76175	3.90049
220	600	300	49.021	0.122348	0.123907	0.212408	0.12	2400000000000000	8300000	0.853842	0.985897	3.0866
221	600	300	35.5077	0.253462	0.470274	0.218152	0.12	2400000000000000	8300000	0.81165	5.76677	17.1622
222	600	300	63.4088	0.492579	0.406906	0.444853	0.12	2400000000000000	8300000	0.726399	35.312	94.0523
223	600	300	41.6144	0.444805	0.293341	0.309257	0.12	2400000000000000	8300000	0.744397	10.488	28.6266
224	600	300	3.35641	0.396954	0.120119	0.425893	0.12	2400000000000000	8300000	0.780324	0.425711	1.21804
225	600	300	19.583	0.350618	0.147221	0.439224	0.12	2400000000000000	8300000	0.789429	2.77304	8.02677
226	600	300	35.3238	0.218591	0.272799	0.28519	0.12	2400000000000000	8300000	0.794342	3.75202	10.9281
227	600	300	16.5679	0.438728	0.352089	0.12912	0.12	2400000000000000	8300000	0.833615	2.06393	6.30859
228	600	300	62.773	0.177399	0.261591	0.143839	0.12	2400000000000000	8300000	0.814158	2.61705	7.81253
229	600	300	40.8495	0.420049	0.0200635	0.258764	0.12	2400000000000000	8300000	0.836664	0.556396	1.70689
230	600	300	41.5019	0.340558	0.438359	0.495526	0.12	2400000000000000	8300000	0.767401	19.1753	53.9555
231	600	300	29.5634	0.301738	0.0580107	0.234243	0.12	2400000000000000	8300000	0.814183	0.757088	2.26016
232	600	300	40.8543	0.236723	0.420369	0.283828	0.12	2400000000000000	8300000	0.826711	7.20695	21.8462
233	600	300	41.7238	0.351814	0.27143	0.31247	0.12	2400000000000000	8300000	0.664677	7.77588	18.951
234	600	300	78.7432	0.256964	0.0871354	0.147778	0.12	2400000000000000	8300000	0.890071	1.62733	5.31095
235	600	300	7.86819	0.148042	0.331719	0.126915	0.12	2400000000000000	8300000	0.667177	0.306286	0.749273
236	600	300	39.2585	0.134299	0.494123	0.356015	0.12	2400000000000000	8300000	0.638397	5.79291	13.56
237	600	300	16.0172	0.198466	0.333128	0.42697	0.12	2400000000000000	8300000	0.628165	2.82402	6.50448
238	600	300	70.4948	0.244915	0.255792	0.212787	0.12	2400000000000000	8300000	0.788056	5.86937	16.9598
239	600	300	66.3529	0.483835	0.142007	0.152966	0.12	2400000000000000	8300000	0.784995	4.3556	12.5368
240	600	300	19.7669	0.386473	0.0503892	0.373656	0.12	2400000000000000	8300000	0.752103	0.898364	2.47743
241	600	300	68.0769	0.33871	0.386888	0.116859	0.12	2400000000000000	8300000	0.647754	6.51124	15.4648
242	600	300	41.464	0.353941	0.308022	0.309758	0.12	2400000000000000	8300000	0.704497	8.74568	22.5914
243	600	300	15.2611	0.26901	0.000704001	0.269013	0.12	2400000000000000	8300000	0.675369	0.0048561	0.0120254
244	600	300	33.3953	0.143379	0.429838	0.42344	0.12	2400000000000000	8300000	0.699486	5.44319	13.9606
245	600	300	50.1293	0.362826	0.252278	0.317111	0.12	2400000000000000	8300000	0.86074	9.08802	28.6822
246	600	300	38.6028	0.322715	0.218596	0.367934	0.12	2400000000000000	8300000	0.633232	6.25802	14.5302
247	600	300	42.9401	0.108776	0.324349	0.345803	0.12	2400000000000000	8300000	0.794503	3.27209	9.53218
248	600	300	37.7427	0.188404	0.203315	0.234731	0.12	2400000000000000	8300000	0.658856	2.11959	5.12051
249	600	300	47.2536	0.238563	0.121818	0.286312	0.12	2400000000000000	8300000	0.865654	2.45569	7.79453
250	600	300	31.3235	0.32584	0.0996868	0.397622	0.12	2400000000000000	8300000	0.603591	2.52679	5.59221
251	600	300	30.3845	0.46672	0.1709	0.132425	0.12	2400000000000000	8300000	0.767714	2.00451	5.64261
252	600	300	30.3365	0.104779	0.347465	0.319426	0.12	2400000000000000	8300000	0.761095	2.20348	6.14922
253	600	300	47.1272	0.227799	0.435442	0.327547	0.12	2400000000000000	8300000	0.664603	9.56346	23.305
254	600	300	77.8885	0.262576	0.211329	0.202869	0.12	2400000000000000	8300000	0.798033	5.47633	16.0244
255	600	300	4.16934	0.48526	0.490299	0.116698	0.12	2400000000000000	8300000	0.72662	0.723021	1.92633
256	600	300	32.4905	0.338345	0.494273	0.395509	0.12	2400000000000000	8300000	0.701477	13.4223	34.5232
257	600	300	62.6787	0.186719	0.476371	0.136234	0.12	2400000000000000	8300000	0.680451	4.74381	11.8357
258	600	300	12.7585	0.44216	0.329851	0.348086	0.12	2400000000000000	8300000	0.816012	4.04549	12.1043
259	600	300	13.0877	0.190098	0.296929	0.420665	0.12	2400000000000000	8300000	0.697922	1.94096	4.96702
260	600	300	18.4877	0.218946	0.327065	0.160958	0.12	2400000000000000	8300000	0.659336	1.33093	3.21761
261	600	300	48.846	0.465055	0.417861	0.251003	0.12	2400000000000000	8300000	0.646049	14.881	35.2507
262	600	300	56.6423	0.115302	0.0724045	0.146249	0.12	2400000000000000	8300000	0.648863	0.431941	1.02766
263	600	300	9.7654	0.131984	0.489181	0.139656	0.12	2400000000000000	8300000	0.74002	0.549955	1.49225
264	600	300	12.6921	0.439083	0.0501494	0.235097	0.12	2400000000000000	8300000	0.873059	0.410374	1.3137
265	600	300	69.3945	0.474016	0.402304	0.381207	0.12	2400000000000000	8300000	0.886443	31.508	102.41
266	600	300	17.5472	0.197339	0.278353	0.170686	0.12	2400000000000000	8300000	0.669954	1.02755	2.52417
267	600	300	44.9399	0.150237	0.333306	0.477734	0.12	2400000000000000	8300000	0.648639	6.71468	15.9698
268	600	300	12.0559	0.2781	0.260282	0.189232	0.12	2400000000000000	8300000	0.786791	1.03139	2.97547
269	600	300	6.26974	0.428773	0.0914701	0.400389	0.12	2400000000000000	8300000	0.635371	0.61493	1.4326
270	600	300	56.566	0.324371	0.0934434	0.160866	0.12	2400000000000000	8300000	0.805694	1.72265	5.08908
271	600	300	33.6242	0.355682	0.223612	0.148081	0.12	2400000000000000	8300000	0.660613	2.4734	5.99119
272	600	300	53.1737	0.259577	0.467406	0.357551	0.12	2400000000000000	8300000	0.600163	14.4073	31.7046
273	600	300	26.9079	0.200807	0.373273	0.296133	0.12	2400000000000000	8300000	0.741731	3.73044	10.1456
274	600	300	73.8821	0.330668	0.0976759	0.475772	0.12	2400000000000000	8300000	0.879375	7.09097	22.8639
275	600	300	51.4181	0.282994	0.226255	0.182131	0.12	2400000000000000	8300000	0.723231	3.74508	9.93137
276	600	300	32.1425	0.451165	0.145246	0.182467	0.12	2400000000000000	8300000	0.88281	2.40044	7.77014
277	600	300	74.1819	0.359304	0.00818634	0.273059	0.12	2400000000000000	8300000	0.850157	0.372128	1.16001
278	600	300	12.8699	0.279616	0.424891	0.207678	0.12	2400000000000000	8300000	0.728713	1.98332	5.29933
279	600	300	47.3617	0.393673	0.200478	0.169233	0.12	2400000000000000	8300000	0.846557	3.95096	12.264
280	600	300	43.1198	0.377582	0.449711	0.27181	0.12	2400000000000000	8300000	0.876096	12.4301	39.9297
281	600	300	12.2639	0.337522	0.256372	0.332354	0.12	2400000000000000	8300000	0.895061	2.20287	7.22958
282	600	300	51.4324	0.449555	0.0887505	0.394924	0.12	2400000000000000	8300000	0.877651	5.06162	16.2886
283	600	300	14.7774	0.165116	0.461767	0.413966	0.12	2400000000000000	8300000	0.647392	2.91315	6.91515
284	600	300	32.3629	0.43195	0.422579	0.327863	0.12	2400000000000000	8300000	0.84455	12.0967	37.4598
285	600	300	74.3156	0.18804	0.024401	0.435963	0.12	2400000000000000	8300000	0.705284	0.928486	2.4011
286	600	300	31.2899	0.142242	0.337089	0.146811	0.12	2400000000000000	8300000	0.767488	1.37569	3.87137
287	600	300	42.5598	0.228244	0.175546	0.14048	0.12	2400000000000000	8300000	0.887676	1.49622	4.8699
288	600	300	31.0611	0.464696	0.027466	0.481044	0.12	2400000000000000	8300000	0.766516	1.19111	3.3477
289	600	300	38.1846	0.223101	0.459285	0.161592	0.12	2400000000000000	8300000	0.7367	3.94893	10.667
290	600	300	44.1998	0.36977	0.221103	0.292585	0.12	2400000000000000	8300000	0.890804	6.60367	21.5694
291	600	300	79.9967	0.119544	0.30941	0.189884	0.12	2400000000000000	8300000	0.891595	3.50922	11.4723
292	600	300	16.3697	0.182035	0.171355	0.105498	0.12	2400000000000000	8300000	0.712566	0.336451	0.87906
293	600	300	19.995	0.436039	0.0885532	0.139614	0.12	2400000000000000	8300000	0.786476	0.673235	1.94144
294	600	300	35.5943	0.215306	0.0129614	0.320948	0.12	2400000000000000	8300000	0.840868	0.199118	0.613917
295	600	300	50.3882	0.257165	0.009622	0.125765	0.12	2400000000000000	8300000	0.678231	0.0979382	0.243557
296	600	300	70.2619	0.14984	0.187415	0.110613	0.12	2400000000000000	8300000	0.747249	1.36315	3.73492
297	600	300	1.28277	0.362497	0.0440292	0.400026	0.12	2400000000000000	8300000	0.67015	0.0511527	0.125693
298	600	300	18.8521	0.192702	0.0196669	0.403283	0.12	2400000000000000	8300000	0.652542	0.179962	0.430586
299	600	300	43.1144	0.313601	0.189705	0.470607	0.12	2400000000000000	8300000	0.780954	7.53917	21.5884
300	600	300	43.975	0.48231	0.0922885	0.421478	0.12	2400000000000000	8300000	0.695126	5.15279	13.1334
301	600	300	1.55096	0.107219	0.459304	0.297504	0.12	2400000000000000	8300000	0.71785	0.141923	0.373558
302	600	300	53.8551	0.271178	0.342254	0.311781	0.12	2400000000000000	8300000	0.733451	9.73343	26.1763
303	600	300	59.7395	0.47668	0.269137	0.419754	0.12	2400000000000000	8300000	0.813191	20.0929	59.911
304	600	300	32.9287	0.175893	0.228696	0.139215	0.12	2400000000000000	8300000	0.701962	1.15174	2.96441
305	600	300	38.1416	0.238435	0.351117	0.403565	0.12	2400000000000000	8300000	0.665062	8.0486	19.627
306	600	300	55.8941	0.446343	0.391184	0.185067	0.12	2400000000000000	8300000	0.757642	11.2806	31.3378
307	600	300	30.652	0.277777	0.347217	0.282149	0.12	2400000000000000	8300000	0.609612	5.20982	11.6452
308	600	300	15.7488	0.173076	0.465906	0.193007	0.12	2400000000000000	8300000	0.665889	1.53089	3.7378
309	600	300	77.4332	0.494255	0.466855	0.493858	0.12	2400000000000000	8300000	0.878248	55.1123	177.475
310	600	300	79.5505	0.316736	0.469776	0.296119	0.12	2400000000000000	8300000	0.659943	21.892	52.974
311	600	300	18.5946	0.321089	0.109976	0.139294	0.12	2400000000000000	8300000	0.777104	0.571254	1.62772
312	600	300	17.9742	0.475962	0.0440632	0.137555	0.12	2400000000000000	8300000	0.817539	0.323863	0.970827
313	600	300	21.4133	0.394442	0.167771	0.47209	0.12	2400000000000000	8300000	0.792294	4.17827	12.1382
314	600	300	65.2947	0.206331	0.0915337	0.462891	0.12	2400000000000000	8300000	0.700575	3.56524	9.1583
315	600	300	13.8073	0.365322	0.430268	0.423155	0.12	2400000000000000	8300000	0.728205	5.73603	15.3157
316	600	300	61.5576	0.373624	0.165892	0.187542	0.12	2400000000000000	8300000	0.753031	4.46917	12.3399
317	600	300	74.7168	0.399894	0.323326	0.478083	0.12	2400000000000000	8300000	0.696849	28.8465	73.706
318	600	300	22.9666	0.213142	0.485002	0.15735	0.12	2400000000000000	8300000	0.831283	2.33326	7.11188
319	600	300	13.5398	0.344383	0.207456	0.196708	0.12	2400000000000000	8300000	0.611163	1.18847	2.66328
320	600	300	22.2482	0.40512	0.0871204	0.450915	0.12	2400000000000000	8300000	0.620935	2.21147	5.035
321	600	300	45.8474	0.441601	0.0581673	0.347753	0.12	2400000000000000	8300000	0.827517	2.55789	7.76122
322	600	300	4.16822	0.47608	0.467219	0.437726	0.12	2400000000000000	8300000	0.62193	2.53477	5.78032
323	600	300	73.6802	0.49677	0.235651	0.264493	0.12	2400000000000000	8300000	0.862085	14.2487	45.0399
324	600	300	15.3802	0.136979	0.231139	0.183149	0.12	2400000000000000	8300000	0.798816	0.55703	1.63154
325	600	300	56.2657	0.360885	0.295976	0.10402	0.12	2400000000000000	8300000	0.799508	3.90455	11.4463
326	600	300	14.9839	0.306378	0.375373	0.408845	0.12	2400000000000000	8300000	0.826081	4.40038	13.3286
327	600	300	35.5283	0.248098	0.266777	0.423582	0.12	2400000000000000	8300000	0.86652	6.22115	19.7661
328	600	300	6.85634	0.427728	0.0907885	0.388079	0.12	2400000000000000	8300000	0.842201	0.645353	1.9929
329	600	300	65.8561	0.142669	0.416441	0.470617	0.12	2400000000000000	8300000	0.737473	11.5009	31.0993
330	600	300	25.9058	0.258792	0.31597	0.382836	0.12	2400000000000000	8300000	0.774532	5.06517	14.3848
331	600	300	18.9053	0.133041	0.151705	0.488181	0.12	2400000000000000	8300000	0.883092	1.16342	3.76715
332	600	300	70.7205	0.22868	0.0178194	0.198534	0.12	2400000000000000	8300000	0.845923	0.357345	1.10838
333	600	300	6.18559	0.109788	0.324229	0.221112	0.12	2400000000000000	8300000	0.869012	0.304081	0.968916
334	600	300	73.2053	0.328511	0.213877	0.359443	0.12	2400000000000000	8300000	0.679988	11.5472	28.7904
335	600	300	14.5544	0.406923	0.496175	0.442089	0.12	2400000000000000	8300000	0.732222	8.11407	21.7848
336	600	300	40.7176	0.451273	0.14089	0.47633	0.12	2400000000000000	8300000	0.618934	7.70186	17.4788
337	600	300	44.1046	0.182124	0.250848	0.111255	0.12	2400000000000000	8300000	0.638595	1.40013	3.27842
338	600	300	53.7051	0.289949	0.213717	0.291723	0.12	2400000000000000	8300000	0.798329	6.06363	17.7495
339	600	300	36.8572	0.306055	0.0702571	0.108495	0.12	2400000000000000	8300000	0.609954	0.537043	1.2011
340	600	300	78.5117	0.441066	0.436249	0.444745	0.12	2400000000000000	8300000	0.809344	41.9634	124.53
341	600	300	40.8871	0.276655	0.103185	0.351367	0.12	2400000000000000	8300000	0.693287	2.56146	6.51138
342	600	300	18.5385	0.420282	0.0905467	0.287807	0.12	2400000000000000	8300000	0.666646	1.26817	3.09987
343	600	300	9.1685	0.300216	0.0281882	0.286648	0.12	2400000000000000	8300000	0.782076	0.13891	0.398341
344	600	300	32.2941	0.121351	0.15046	0.437381	0.12	2400000000000000	8300000	0.85019	1.61077	5.02135
345	600	300	42.2421	0.301111	0.368781	0.438367	0.12	2400000000000000	8300000	0.826506	12.8429	38.9208
346	600	300	44.7058	0.328584	0.0192093	0.464108	0.12	2400000000000000	8300000	0.730645	0.81795	2.19131
347	600	300	54.8896	0.133187	0.489811	0.31974	0.12	2400000000000000	8300000	0.803483	7.15094	21.0674
348	600	300	6.2248	0.149118	0.263928	0.130246	0.12	2400000000000000	8300000	0.694757	0.199294	0.507689
349	600	300	26.9098	0.191307	0.110693	0.404681	0.12	2400000000000000	8300000	0.741507	1.44032	3.91604
350	600	300	49.2064	0.293375	0.355698	0.447145	0.12	2400000000000000	8300000	0.787437	14.3404	41.4046
351	600	300	33.4429	0.140187	0.170346	0.318478	0.12	2400000000000000	8300000	0.689171	1.58858	4.01427
352	600	300	55.5112	0.105408	0.329922	0.264573	0.12	2400000000000000	8300000	0.69617	3.19006	8.14302
353	600	300	21.34	0.242598	0.346904	0.392455	0.12	2400000000000000	8300000	0.776423	4.40218	12.5325
354	600	300	75.7364	0.447147	0.0159487	0.135395	0.12	2400000000000000	8300000	0.658786	0.456743	1.10329
355	600	300	49.6689	0.224585	0.447183	0.455816	0.12	2400000000000000	8300000	0.600631	14.2012	31.2756
356	600	300	33.812	0.203692	0.375356	0.140367	0.12	2400000000000000	8300000	0.665037	2.26643	5.52661
357	600	300	50.2248	0.271805	0.331457	0.386636	0.12	2400000000000000	8300000	0.869736	10.9268	34.8458
358	600	300	36.5037	0.375906	0.345598	0.424215	0.12	2400000000000000	8300000	0.780712	12.5649	35.9685
359	600	300	60.8877	0.166352	0.0190797	0.324169	0.12	2400000000000000	8300000	0.805048	0.391279	1.15499
360	600	300	39.7119	0.14596	0.296553	0.310234	0.12	2400000000000000	8300000	0.688109	3.33067	8.4035
361	600	300	15.4678	0.283145	0.329394	0.119807	0.12	2400000000000000	8300000	0.869841	1.0795	3.44297
362	600	300	7.10822	0.185595	0.25028	0.360262	0.12	2400000000000000	8300000	0.667505	0.74295	1.81838
363	600	300	22.6349	0.226308	0.495189	0.370364	0.12	2400000000000000	8300000	0.679073	5.86766	14.6101
364	600	300	3.14463	0.108841	0.443541	0.104132	0.12	2400000000000000	8300000	0.656056	0.0987339	0.237508
365	600	300	17.7161	0.315664	0.156686	0.440978	0.12	2400000000000000	8300000	0.638573	2.4134	5.6508
366	600	300	74.9494	0.350359	0.379258	0.309926	0.12	2400000000000000	8300000	0.663503	19.2779	46.9002
367	600	300	79.827	0.350574	0.388128	0.203158	0.12	2400000000000000	8300000	0.687971	13.7824	34.767
368	600	300	55.7532	0.279666	0.478198	0.190113	0.12	2400000000000000	8300000	0.762526	8.85354	24.7539
369	600	300	67.7576	0.286391	0.208733	0.210656	0.12	2400000000000000	8300000	0.834643	5.32928	16.3095
370	600	300	57.5306	0.383109	0.36415	0.290923	0.12	2400000000000000	8300000	0.727944	14.5837	38.9257
371	600	300	24.4954	0.283525	0.325464	0.26749	0.12	2400000000000000	8300000	0.740989	3.77636	10.2602
372	600	300	76.6229	0.448834	0.309522	0.181629	0.12	2400000000000000	8300000	0.688386	12.0756	30.4799
373	600	300	74.8381	0.221094	0.298083	0.446125	0.12	2400000000000000	8300000	0.773629	13.7429	38.9837
374	600	300	18.4295	0.388327	0.354587	0.410829	0.12	2400000000000000	8300000	0.769565	6.51154	18.3739
375	600	300	38.296	0.161761	0.0935777	0.298959	0.12	2400000000000000	8300000	0.695642	1.08243	2.76093
376	600	300	41.9583	0.268694	0.295133	0.274603	0.12	2400000000000000	8300000	0.804328	5.7067	16.8302
377	600	300	35.2235	0.479473	0.34179	0.115978	0.12	2400000000000000	8300000	0.653032	4.18135	10.012
378	600	300	30.049	0.419522	0.214004	0.262048	0.12	2400000000000000	8300000	0.828376	4.41543	13.4113
379	600	300	56.3415	0.14719	0.32991	0.461575	0.12	2400000000000000	8300000	0.618135	7.88734	17.8766
380	600	300	26.6085	0.32408	0.366486	0.31036	0.12	2400000000000000	8300000	0.658584	6.12607	14.7933
381	600	300	38.0943	0.209258	0.1521	0.162421	0.12	2400000000000000	8300000	0.788492	1.22999	3.55606
382	600	300	49.4712	0.269933	0.31348	0.455137	0.12	2400000000000000	8300000	0.897103	11.9	39.1437
383	600	300	34.1246	0.41037	0.317455	0.300939	0.12	2400000000000000	8300000	0.813347	8.35583	24.9194
384	600	300	35.3192	0.251701	0.145393	0.179126	0.12	2400000000000000	8300000	0.605959	1.44605	3.21291
385	600	300	56.5527	0.450571	0.119476	0.342139	0.12	2400000000000000	8300000	0.799518	6.50558	19.0715
386	600	300	64.2635	0.452294	0.0729605	0.461926	0.12	2400000000000000	8300000	0.644022	6.11832	14.4479
387	600	300	29.8293	0.130859	0.182201	0.237776	0.12	2400000000000000	8300000	0.896723	1.05621	3.47281
388	600	300	35.2084	0.32189	0.421904	0.417238	0.12	2400000000000000	8300000	0.871348	12.4606	39.8108
389	600	300	35.1309	0.481671	0.305637	0.483094	0.12	2400000000000000	8300000	0.797018	15.605	45.6042
390	600	300	21.729	0.300507	0.425594	0.108048	0.12	2400000000000000	8300000	0.828611	1.8754	5.69792
391	600	300	23.4676	0.285249	0.231157	0.264278	0.12	2400000000000000	8300000	0.75382	2.55416	7.0597
392	600	300	17.9875	0.353397	0.222693	0.485531	0.12	2400000000000000	8300000	0.680087	4.29282	10.7048
393	600	300	77.5626	0.477337	0.21036	0.493382	0.12	2400000000000000	8300000	0.720098	24	63.3686
394	600	300	3.61349	0.375286	0.203724	0.426237	0.12	2400000000000000	8300000	0.811374	0.735479	2.18808
395	600	300	19.6414	0.137346	0.252205	0.469006	0.12	2400000000000000	8300000	0.845909	1.99301	6.18166
396	600	300	27.4222	0.275743	0.451727	0.2336	0.12	2400000000000000	8300000	0.810045	4.98359	14.8021
397	600	300	64.2332	0.122042	0.0288844	0.158474	0.12	2400000000000000	8300000	0.746855	0.224119	0.613743
398	600	300	42.4887	0.31118	0.105664	0.435284	0.12	2400000000000000	8300000	0.847453	3.79817	11.8022
399	600	300	48.2988	0.322832	0.194975	0.405911	0.12	2400000000000000	8300000	0.873592	7.70743	24.6882
400	600	300	51.277	0.194301	0.00679336	0.237235	0.12	2400000000000000	8300000	0.869643	0.100288	0.319787
401	600	300	41.4039	0.377529	0.181949	0.12038	0.12	2400000000000000	8300000	0.647475	2.13837	5.07665
402	600	300	64.9641	0.197543	0.12919	0.477228	0.12	2400000000000000	8300000	0.712593	4.94168	12.9118
403	600	300	14.7691	0.156357	0.0338804	0.416233	0.12	2400000000000000	8300000	0.751123	0.203396	0.560177
404	600	300	26.6762	0.300934	0.405775	0.385549	0.12	2400000000000000	8300000	0.722523	7.84417	20.7812
405	600	300	55.5299	0.193996	0.0405943	0.173274	0.12	2400000000000000	8300000	0.604966	0.473266	1.0498
406	600	300	68.2957	0.250133	0.495669	0.487441	0.12	2400000000000000	8300000	0.789846	25.7789	74.6583
407	600	300	20.0117	0.183569	0.0673573	0.362726	0.12	2400000000000000	8300000	0.706907	0.560576	1.45301
408	600	300	17.5029	0.40652	0.331743	0.21139	0.12	2400000000000000	8300000	0.71764	3.11648	8.20053
409	600	300	59.8348	0.196613	0.101846	0.451901	0.12	2400000000000000	8300000	0.665787	3.38173	8.25554
410	600	300	45.1742	0.131514	0.0574563	0.357403	0.12	2400000000000000	8300000	0.620559	0.761983	1.7338
411	600	300	10.387	0.17315	0.257264	0.489556	0.12	2400000000000000	8300000	0.640766	1.41476	3.32394
412	600	300	72.5362	0.482669	0.155588	0.437692	0.12	2400000000000000	8300000	0.817696	14.8914	44.6476
413	600	300	25.5574	0.260739	0.0791737	0.178862	0.12	2400000000000000	8300000	0.69328	0.589397	1.49826
414	600	300	76.5069	0.242102	0.246482	0.204489	0.12	2400000000000000	8300000	0.881155	5.83098	18.8393
415	600	300	46.0442	0.164344	0.231348	0.496631	0.12	2400000000000000	8300000	0.709149	5.43018	14.1196
416	600	300	34.8069	0.221516	0.106948	0.13895	0.12	2400000000000000	8300000	0.789663	0.715629	2.07206
417	600	300	36.7479	0.262559	0.115381	0.141805	0.12	2400000000000000	8300000	0.811156	0.985987	2.93256
418	600	300	52.298	0.466002	0.337912	0.401497	0.12	2400000000000000	8300000	0.60442	20.6512	45.7674
419	600	300	3.2472	0.258262	0.164629	0.297068	0.12	2400000000000000	8300000	0.837827	0.256165	0.786947
420	600	300	35.2015	0.260508	0.0321397	0.348615	0.12	2400000000000000	8300000	0.686598	0.641737	1.61559
421	600	300	32.4333	0.310915	0.257672	0.264797	0.12	2400000000000000	8300000	0.827137	4.29734	13.0331
422	600	300	45.4482	0.147607	0.108709	0.388637	0.12	2400000000000000	8300000	0.840139	1.77019	5.45308
423	600	300	17.016	0.375147	0.249423	0.308667	0.12	2400000000000000	8300000	0.719032	3.06953	8.09267
424	600	300	76.6407	0.451251	0.228266	0.107665	0.12	2400000000000000	8300000	0.650441	5.3086	12.6607
425	600	300	2.05552	0.465742	0.466068	0.471333	0.12	2400000000000000	8300000	0.772043	1.3135	3.7183
426	600	300	51.347	0.28064	0.407391	0.234306	0.12	2400000000000000	8300000	0.842348	8.59103	26.5344
427	600	300	23.65	0.385294	0.401022	0.191742	0.12	2400000000000000	8300000	0.800118	4.37618	12.8387
428	600	300	13.378	0.15688	0.307853	0.393998	0.12	2400000000000000	8300000	0.604733	1.58995	3.52548
429	600	300	75.9283	0.49995	0.182236	0.331385	0.12	2400000000000000	8300000	0.796199	14.3181	41.8002
430	600	300	36.1951	0.147566	0.359204	0.329037	0.12	2400000000000000	8300000	0.872041	3.94286	12.6072
431	600	300	52.8665	0.220285	0.0951348	0.169385	0.12	2400000000000000	8300000	0.61984	1.17211	2.6639
432	600	300	74.7038	0.302145	0.257076	0.259475	0.12	2400000000000000	8300000	0.699919	9.40379	24.1336
433	600	300	45.4745	0.228051	0.278216	0.350677	0.12	2400000000000000	8300000	0.632635	6.31939	14.6589
434	600	300	63.5314	0.495959	0.059577	0.279067	0.12	2400000000000000	8300000	0.895339	3.27196	10.7416
435	600	300	39.5524	0.370641	0.114445	0.307934	0.12	2400000000000000	8300000	0.60055	3.22676	7.10538
436	600	300	23.149	0.217168	0.449503	0.461468	0.12	2400000000000000	8300000	0.836481	6.51314	19.9764
437	600	300	18.1965	0.442694	0.466583	0.260839	0.12	2400000000000000	8300000	0.701566	6.12321	15.7514
438	600	300	40.961	0.377677	0.193969	0.115112	0.12	2400000000000000	8300000	0.71705	2.1574	5.6722
439	600	300	32.6516	0.268544	0.242715	0.418885	0.12	2400000000000000	8300000	0.81746	5.568	16.6892
440	600	300	79.6137	0.108371	0.369352	0.189291	0.12	2400000000000000	8300000	0.82586	3.76754	11.4087
441	600	300	72.4173	0.329632	0.342819	0.168996	0.12	2400000000000000	8300000	0.684233	8.63771	21.6708
442	600	300	5.54572	0.312159	0.348402	0.444201	0.12	2400000000000000	8300000	0.601288	1.67333	3.68923
443	600	300	10.893	0.153395	0.265918	0.123745	0.12	2400000000000000	8300000	0.670467	0.343416	0.844247
444	600	300	61.8086	0.439677	0.0414065	0.172503	0.12	2400000000000000	8300000	0.890895	1.21237	3.96034
445	600	300	54.5715	0.49368	0.253174	0.252695	0.12	2400000000000000	8300000	0.857279	10.765	33.8383
446	600	300	54.6253	0.426968	0.322571	0.301041	0.12	2400000000000000	8300000	0.682254	14.1458	35.3871
447	600	300	43.5579	0.148439	0.154973	0.206276	0.12	2400000000000000	8300000	0.704597	1.29094	3.33518
448	600	300	25.3019	0.17185	0.0864763	0.183502	0.12	2400000000000000	8300000	0.809416	0.43095	1.279
449	600	300	65.314	0.407393	0.089447	0.282493	0.12	2400000000000000	8300000	0.84919	4.19933	13.0755
450	600	300	1.68148	0.315691	0.0601444	0.293867	0.12	2400000000000000	8300000	0.820271	0.0585985	0.176244
451	600	300	56.0424	0.438022	0.0859914	0.47021	0.12	2400000000000000	8300000	0.796679	6.19935	18.1093
452	600	300	11.5549	0.244989	0.118805	0.281311	0.12	2400000000000000	8300000	0.605917	0.590913	1.31283
453	600	300	57.3602	0.274873	0.226373	0.322271	0.12	2400000000000000	8300000	0.619324	7.18416	16.3142
454	600	300	71.5843	0.104583	0.410905	0.447488	0.12	2400000000000000	8300000	0.792391	8.5978	24.9803
455	600	300	53.7553	0.442456	0.18234	0.308582	0.12	2400000000000000	8300000	0.816409	8.35855	25.0213
456	600	300	39.5415	0.258527	0.142279	0.406347	0.12	2400000000000000	8300000	0.816358	3.69135	11.0494
457	600	300	38.0134	0.19879	0.225325	0.346625	0.12	2400000000000000	8300000	0.861269	3.68626	11.6412
458	600	300	72.6597	0.450601	0.349906	0.176056	0.12	2400000000000000	8300000	0.685405	12.5973	31.6588
459	600	300	52.111	0.423021	0.456536	0.105758	0.12	2400000000000000	8300000	0.713883	6.64761	17.4006
460	600	300	75.3653	0.291686	0.148365	0.169704	0.12	2400000000000000	8300000	0.887031	3.45698	11.2436
461	600	300	20.2691	0.220405	0.398397	0.344729	0.12	2400000000000000	8300000	0.710981	3.83211	9.99004
462	600	300	57.4991	0.44042	0.236754	0.313931	0.12	2400000000000000	8300000	0.856397	11.7557	36.9142
463	600	300	40.3969	0.227985	0.42143	0.339491	0.12	2400000000000000	8300000	0.863044	8.22989	26.0435
464	600	300	72.5687	0.406974	0.362161	0.333292	0.12	2400000000000000	8300000	0.867297	22.2654	70.8058
465	600	300	55.6963	0.441494	0.284991	0.111611	0.12	2400000000000000	8300000	0.62717	4.88511	11.2339
466	600	300	27.8125	0.107355	0.189895	0.437246	0.12	2400000000000000	8300000	0.716238	1.54842	4.06646
467	600	300	76.7981	0.424312	0.494669	0.22603	0.12	2400000000000000	8300000	0.629104	22.7564	52.4926
468	600	300	7.92683	0.39684	0.208271	0.100453	0.12	2400000000000000	8300000	0.668169	0.41105	1.00705
469	600	300	32.0942	0.469183	0.198888	0.186382	0.12	2400000000000000	8300000	0.760111	3.48633	9.71665
470	600	300	55.6152	0.221221	0.0347922	0.341275	0.12	2400000000000000	8300000	0.628987	0.912415	2.10429
471	600	300	1.99079	0.27634	0.418344	0.279119	0.12	2400000000000000	8300000	0.7746	0.401218	1.13954
472	600	300	13.1046	0.494495	0.127638	0.348004	0.12	2400000000000000	8300000	0.862004	1.79778	5.68222
473	600	300	36.6463	0.273599	0.00650425	0.252382	0.12	2400000000000000	8300000	0.630923	0.102799	0.237813
474	600	300	10.9225	0.321824	0.0115968	0.481045	0.12	2400000000000000	8300000	0.762675	0.122476	0.342502
475	600	300	38.1292	0.430351	0.432803	0.369822	0.12	2400000000000000	8300000	0.674522	16.404	40.5713
476	600	300	46.6355	0.492429	0.240208	0.290584	0.12	2400000000000000	8300000	0.652537	10.0117	23.9543
477	600	300	67.1472	0.365247	0.146	0.302083	0.12	2400000000000000	8300000	0.638395	6.75586	15.814
478	600	300	26.7221	0.437823	0.275699	0.152261	0.12	2400000000000000	8300000	0.780176	3.06745	8.77488
479	600	300	5.85518	0.222604	0.346906	0.180888	0.12	2400000000000000	8300000	0.610541	0.510836	1.14358
480	600	300	9.95128	0.208763	0.428223	0.404727	0.12	2400000000000000	8300000	0.84599	2.2488	6.97569
481	600	300	17.7671	0.498283	0.377099	0.403062	0.12	2400000000000000	8300000	0.694208	8.40441	21.3928
482	600	300	42.0994	0.206594	0.47436	0.295448	0.12	2400000000000000	8300000	0.766635	7.61323	21.4008
483	600	300	32.8888	0.28021	0.0725873	0.208062	0.12	2400000000000000	8300000	0.869383	0.869304	2.77111
484	600	300	72.487	0.203545	0.361845	0.381871	0.12	2400000000000000	8300000	0.828242	12.7335	38.6702
485	600	300	21.7265	0.171051	0.18976	0.102614	0.12	2400000000000000	8300000	0.724818	0.451975	1.2012
486	600	300	13.4621	0.132264	0.344824	0.114615	0.12	2400000000000000	8300000	0.832904	0.439519	1.34228
487	600	300	71.8253	0.487444	0.066967	0.382508	0.12	2400000000000000	8300000	0.637856	5.60133	13.1004
488	600	300	36.887	0.419828	0.3445	0.197294	0.12	2400000000000000	8300000	0.654691	6.57407	15.7813
489	600	300	17.7806	0.103728	0.220615	0.271247	0.12	2400000000000000	8300000	0.670108	0.689333	1.69373
490	600	300	12.7073	0.407353	0.139325	0.18813	0.12	2400000000000000	8300000	0.611924	0.847416	1.90136
491	600	300	71.0934	0.154819	0.389196	0.219743	0.12	2400000000000000	8300000	0.80155	5.87928	17.2793
492	600	300	52.4315	0.329957	0.479746	0.428895	0.12	2400000000000000	8300000	0.853454	22.233	69.5745
493	600	300	61.4642	0.273544	0.213639	0.258389	0.12	2400000000000000	8300000	0.781265	5.79682	16.6058
494	600	300	15.1377	0.248158	0.0692828	0.321209	0.12	2400000000000000	8300000	0.767495	0.522141	1.46938
495	600	300	6.28396	0.448103	0.111366	0.238152	0.12	2400000000000000	8300000	0.883295	0.466451	1.51072
496	600	300	3.78912	0.391936	0.222635	0.150399	0.12	2400000000000000	8300000	0.808188	0.310584	0.92037
497	600	300	37.208	0.271434	0.499111	0.252082	0.12	2400000000000000	8300000	0.707517	7.93646	20.589
498	600	300	74.9605	0.38301	0.102615	0.33904	0.12	2400000000000000	8300000	0.6443	6.23864	14.7384
499	600	300	4.93985	0.190758	0.488895	0.413588	0.12	2400000000000000	8300000	0.762379	1.19005	3.32666
500	600	300	26.4473	0.392403	0.0499733	0.129982	0.12	2400000000000000	8300000	0.884263	0.421039	1.36513
501	600	300	21.7937	0.157168	0.303953	0.388101	0.12	2400000000000000	8300000	0.812852	2.52368	7.52171
502	600	300	31.0788	0.334303	0.0784678	0.190329	0.12	2400000000000000	8300000	0.637009	0.969145	2.26363
503	600	300	47.1495	0.256765	0.230516	0.471561	0.12	2400000000000000	8300000	0.854925	8.21938	25.7655
504	600	300	42.7556	0.285211	0.42796	0.298927	0.12	2400000000000000	8300000	0.746368	9.74346	26.6647
505	600	300	43.1735	0.246561	0.435162	0.458862	0.12	2400000000000000	8300000	0.784544	13.2758	38.1899
506	600	300	12.1786	0.197208	0.323477	0.365133	0.12	2400000000000000	8300000	0.71158	1.77175	4.62272
507	600	300	62.9549	0.226942	0.231976	0.323557	0.12	2400000000000000	8300000	0.765336	6.69772	18.7954
508	600	300	76.2254	0.248563	0.252705	0.319642	0.12	2400000000000000	8300000	0.687966	9.55875	24.1124
509	600	300	27.8333	0.270484	0.467166	0.282383	0.12	2400000000000000	8300000	0.717688	6.20303	16.3234
510	600	300	9.37013	0.182067	0.292682	0.247213	0.12	2400000000000000	8300000	0.732747	0.770958	2.07136
511	600	300	21.7002	0.119264	0.318435	0.130616	0.12	2400000000000000	8300000	0.717758	0.67232	1.7694
512	600	300	50.3932	0.105412	0.456705	0.35443	0.12	2400000000000000	8300000	0.705691	5.3705	13.8963
513	600	300	79.2386	0.203952	0.427014	0.488812	0.12	2400000000000000	8300000	0.839518	21.0685	64.8538
514	600	300	52.4669	0.158238	0.139686	0.38567	0.12	2400000000000000	8300000	0.619185	2.79353	6.34228
515	600	300	6.65739	0.162974	0.21404	0.310223	0.12	2400000000000000	8300000	0.829534	0.449964	1.36862
516	600	300	28.8681	0.155842	0.374757	0.430847	0.12	2400000000000000	8300000	0.65231	4.53692	10.8514
517	600	300	54.4949	0.229564	0.48759	0.276553	0.12	2400000000000000	8300000	0.609956	10.5361	23.564
518	600	300	61.4743	0.319578	0.165615	0.4002	0.12	2400000000000000	8300000	0.779798	8.13268	23.2534
519	600	300	15.9917	0.292918	0.181415	0.317317	0.12	2400000000000000	8300000	0.786577	1.6842	4.85743
520	600	300	54.0514	0.115247	0.0312309	0.225836	0.12	2400000000000000	8300000	0.855157	0.274411	0.860437
521	600	300	33.7152	0.160483	0.488328	0.425895	0.12	2400000000000000	8300000	0.610364	7.02836	15.7295
522	600	300	63.6904	0.185786	0.423993	0.185788	0.12	2400000000000000	8300000	0.621986	5.82173	13.2771
523	600	300	56.2954	0.340325	0.232189	0.249543	0.12	2400000000000000	8300000	0.873308	6.93329	22.2013
524	600	300	54.4615	0.328125	0.3356	0.189236	0.12	2400000000000000	8300000	0.811843	7.08832	21.1002
525	600	300	24.9449	0.28821	0.152306	0.145688	0.12	2400000000000000	8300000	0.827191	0.996361	3.022
526	600	300	27.3847	0.300083	0.375338	0.240642	0.12	2400000000000000	8300000	0.85878	4.63587	14.5977
527	600	300	72.6921	0.103718	0.261285	0.376964	0.12	2400000000000000	8300000	0.635264	4.63813	10.8036
528	600	300	8.88495	0.167563	0.213884	0.483035	0.12	2400000000000000	8300000	0.891389	0.960676	3.1399
529	600	300	52.019	0.423842	0.43143	0.42604	0.12	2400000000000000	8300000	0.633754	25.3112	58.8174
530	600	300	72.8876	0.414033	0.179889	0.23448	0.12	2400000000000000	8300000	0.686759	7.95036	20.0199
531	600	300	47.6754	0.360192	0.0725138	0.438198	0.12	2400000000000000	8300000	0.859632	3.40806	10.7421
532	600	300	37.9951	0.329498	0.226869	0.436971	0.12	2400000000000000	8300000	0.852244	7.75165	24.2231
533	600	300	39.6347	0.114462	0.082399	0.448185	0.12	2400000000000000	8300000	0.825448	1.04642	3.16713
534	600	300	55.8286	0.394407	0.135866	0.253776	0.12	2400000000000000	8300000	0.64505	4.74187	11.2154
535	600	300	5.21329	0.281308	0.371228	0.153931	0.12	2400000000000000	8300000	0.765082	0.523417	1.46834
536	600	300	77.7523	0.285062	0.155638	0.117037	0.12	2400000000000000	8300000	0.802851	2.5216	7.42306
537	600	300	46.9205	0.231816	0.0147444	0.22815	0.12	2400000000000000	8300000	0.605255	0.228528	0.507166
538	600	300	28.5035	0.377349	0.455855	0.46753	0.12	2400000000000000	8300000	0.769959	14.3174	40.4207
539	600	300	15.2745	0.419373	0.239948	0.399749	0.12	2400000000000000	8300000	0.63819	3.83759	8.98008
540	600	300	30.1439	0.120769	0.0758503	0.155901	0.12	2400000000000000	8300000	0.694973	0.268874	0.685153
541	600	300	70.4633	0.116023	0.0997627	0.220783	0.12	2400000000000000	8300000	0.869485	1.12468	3.5856
542	600	300	15.2259	0.337589	0.488141	0.443872	0.12	2400000000000000	8300000	0.775606	6.956	19.7821
543	600	300	2.69934	0.410868	0.249055	0.252829	0.12	2400000000000000	8300000	0.722766	0.436183	1.15595
544	600	300	19.5928	0.449778	0.47125	0.253232	0.12	2400000000000000	8300000	0.645122	6.56828	15.5369
545	600	300	15.4882	0.464632	0.0257643	0.131693	0.12	2400000000000000	8300000	0.867415	0.152503	0.485038
546	600	300	10.2727	0.188789	0.129564	0.474688	0.12	2400000000000000	8300000	0.613405	0.74497	1.67555
547	600	300	64.2139	0.229279	0.175669	0.298546	0.12	2400000000000000	8300000	0.815921	4.82266	14.428
548	600	300	57.01	0.303716	0.438201	0.295209	0.12	2400000000000000	8300000	0.727119	13.9897	37.2979
549	600	300	23.5691	0.353767	0.391001	0.281586	0.12	2400000000000000	8300000	0.773203	5.73371	16.2555
550	600	300	12.1484	0.322866	0.476534	0.215198	0.12	2400000000000000	8300000	0.604599	2.51222	5.56925
551	600	300	36.8993	0.233448	0.232838	0.191814	0.12	2400000000000000	8300000	0.883013	2.40286	7.77979
552	600	300	76.368	0.212759	0.303736	0.498581	0.12	2400000000000000	8300000	0.891181	15.3681	50.2176
553	600	300	29.806	0.423796	0.283516	0.238182	0.12	2400000000000000	8300000	0.809323	5.32762	15.8098
554	600	300	40.5489	0.401484	0.277058	0.396747	0.12	2400000000000000	8300000	0.658494	11.1768	26.9862
555	600	300	14.1473	0.335229	0.0632171	0.29992	0.12	2400000000000000	8300000	0.876616	0.561617	1.80518
556	600	300	76.7652	0.296809	0.378297	0.368017	0.12	2400000000000000	8300000	0.779542	19.812	56.629
557	600	300	20.6031	0.193135	0.398231	0.231145	0.12	2400000000000000	8300000	0.804014	2.2877	6.74427
558	600	300	25.68	0.319986	0.444642	0.460217	0.12	2400000000000000	8300000	0.62622	10.5023	24.1148
559	600	300	56.9742	0.146387	0.327186	0.209305	0.12	2400000000000000	8300000	0.715312	3.56731	9.35637
560	600	300	7.37405	0.394707	0.127844	0.486123	0.12	2400000000000000	8300000	0.67094	1.12979	2.7794
561	600	300	25.892	0.148063	0.0319569	0.206158	0.12	2400000000000000	8300000	0.786546	0.157749	0.454948
562	600	300	20.0352	0.417714	0.321872	0.452421	0.12	2400000000000000	8300000	0.829656	7.61174	23.1554
563	600	300	45.1209	0.412983	0.34355	0.48804	0.12	2400000000000000	8300000	0.818084	19.5138	58.5343
564	600	300	67.5014	0.257189	0.349953	0.478198	0.12	2400000000000000	8300000	0.882304	18.1455	58.7029
565	600	300	19.921	0.299192	0.463814	0.293314	0.12	2400000000000000	8300000	0.838108	5.06435	15.5631
566	600	300	69.7768	0.21815	0.139565	0.212612	0.12	2400000000000000	8300000	0.604092	2.82109	6.24873
567	600	300	59.1442	0.482982	0.334541	0.152383	0.12	2400000000000000	8300000	0.763136	9.09526	25.45
568	600	300	68.9726	0.478806	0.123588	0.385491	0.12	2400000000000000	8300000	0.682296	9.82685	24.5843
569	600	300	34.4235	0.296176	0.331836	0.296798	0.12	2400000000000000	8300000	0.827135	6.27157	19.0206
570	600	300	47.8125	0.276477	0.15198	0.277862	0.12	2400000000000000	8300000	0.646833	3.4866	8.26924
571	600	300	72.0273	0.108039	0.0753543	0.387247	0.12	2400000000000000	8300000	0.870755	1.41828	4.52822
572	600	300	6.76749	0.421412	0.274657	0.377391	0.12	2400000000000000	8300000	0.719873	1.84631	4.8734
573	600	300	1.69624	0.163965	0.12159	0.296725	0.12	2400000000000000	8300000	0.712154	0.0626724	0.163652
574	600	300	44.1151	0.321416	0.136966	0.316693	0.12	2400000000000000	8300000	0.716173	3.84144	10.0875
575	600	300	1.78056	0.432844	0.424696	0.382612	0.12	2400000000000000	8300000	0.685508	0.782189	1.96605
576	600	300	51.1601	0.230157	0.454285	0.192035	0.12	2400000000000000	8300000	0.776518	6.41582	18.2673
577	600	300	5.78252	0.141513	0.355988	0.225452	0.12	2400000000000000	8300000	0.742281	0.410193	1.11642
578	600	300	15.7116	0.314797	0.128987	0.263782	0.12	2400000000000000	8300000	0.63639	1.05106	2.45258
579	600	300	56.0007	0.436779	0.230992	0.447329	0.12	2400000000000000	8300000	0.768521	15.7858	44.4829
580	600	300	51.9605	0.418048	0.411433	0.241976	0.12	2400000000000000	8300000	0.772887	13.5069	38.2776
581	600	300	22.5404	0.268292	0.201054	0.200785	0.12	2400000000000000	8300000	0.666938	1.52475	3.72868
582	600	300	67.4756	0.240507	0.0158689	0.431664	0.12	2400000000000000	8300000	0.70506	0.694311	1.79495
583	600	300	33.1282	0.155715	0.369978	0.337738	0.12	2400000000000000	8300000	0.693822	4.02596	10.2421
584	600	300	73.6329	0.450619	0.301411	0.310298	0.12	2400000000000000	8300000	0.837292	19.3823	59.5051
585	600	300	45.0403	0.444422	0.144641	0.494407	0.12	2400000000000000	8300000	0.638772	8.94045	20.94
586	600	300	2.08256	0.220013	0.136214	0.125622	0.12	2400000000000000	8300000	0.742524	0.0489688	0.133322
587	600	300	41.4762	0.273546	0.317016	0.340331	0.12	2400000000000000	8300000	0.87103	7.64536	24.4176
588	600	300	6.94011	0.125621	0.115036	0.168677	0.12	2400000000000000	8300000	0.669241	0.105658	0.259273
589	600	300	44.8327	0.150282	0.290903	0.409756	0.12	2400000000000000	8300000	0.730608	5.01605	13.4375
590	600	300	1.23421	0.13578	0.345474	0.423504	0.12	2400000000000000	8300000	0.827167	0.153138	0.464459
591	600	300	63.4012	0.10685	0.241485	0.153446	0.12	2400000000000000	8300000	0.795228	1.56785	4.57158
592	600	300	29.3081	0.262264	0.245961	0.105403	0.12	2400000000000000	8300000	0.627006	1.24461	2.86138
593	600	300	71.4037	0.481804	0.213577	0.365211	0.12	2400000000000000	8300000	0.81051	16.7601	49.8089
594	600	300	48.0822	0.268682	0.430577	0.48131	0.12	2400000000000000	8300000	0.856746	16.7219	52.5302
595	600	300	34.81	0.24561	0.479782	0.463638	0.12	2400000000000000	8300000	0.620737	11.8784	27.0357
596	600	300	16.2587	0.239178	0.347271	0.345197	0.12	2400000000000000	8300000	0.801937	2.91158	8.56133
597	600	300	29.874	0.185036	0.140905	0.209178	0.12	2400000000000000	8300000	0.726873	1.0176	2.71212
598	600	300	78.1522	0.15347	0.165979	0.477813	0.12	2400000000000000	8300000	0.802285	5.94105	17.4769
599	600	300	60.65	0.143963	0.322601	0.248148	0.12	2400000000000000	8300000	0.874911	4.36563	14.005
600	600	300	24.9362	0.169195	0.27022	0.119294	0.12	2400000000000000	8300000	0.748744	0.849454	2.33208
601	600	300	77.4138	0.222067	0.443702	0.492397	0.12	2400000000000000	8300000	0.625581	23.4583	53.8087
602	600	300	76.7479	0.494403	0.0668114	0.287235	0.12	2400000000000000	8300000	0.76493	4.54802	12.756
603	600	300	3.8129	0.354001	0.442195	0.414942	0.12	2400000000000000	8300000	0.849893	1.54685	4.82042
604	600	300	14.0793	0.195712	0.315142	0.350241	0.12	2400000000000000	8300000	0.69038	1.89958	4.80859
605	600	300	67.3323	0.174127	0.209912	0.220001	0.12	2400000000000000	8300000	0.638142	3.38174	7.91277
606	600	300	69.4319	0.391703	0.468166	0.286985	0.12	2400000000000000	8300000	0.749506	22.8224	62.7202
607	600	300	79.7561	0.10464	0.445628	0.35712	0.12	2400000000000000	8300000	0.834302	8.29536	25.3764
608	600	300	41.443	0.349884	0.0866803	0.121587	0.12	2400000000000000	8300000	0.712454	0.954487	2.49344
609	600	300	73.8774	0.117199	0.382515	0.129477	0.12	2400000000000000	8300000	0.65679	2.67834	6.45005
610	600	300	30.4706	0.162919	0.474798	0.415705	0.12	2400000000000000	8300000	0.839003	6.11977	18.8265
611	600	300	35.4964	0.448178	0.0254615	0.198016	0.12	2400000000000000	8300000	0.739792	0.500963	1.3589
612	600	300	56.6153	0.174686	0.0299934	0.366829	0.12	2400000000000000	8300000	0.792628	0.679622	1.97519
613	600	300	38.1748	0.350686	0.140816	0.196004	0.12	2400000000000000	8300000	0.620014	2.30781	5.24655
614	600	300	5.5385	0.424812	0.0502405	0.434727	0.12	2400000000000000	8300000	0.675489	0.320957	0.794943
615	600	300	12.4631	0.373377	0.215319	0.144423	0.12	2400000000000000	8300000	0.633336	0.903815	2.09887
616	600	300	39.2584	0.106928	0.0232327	0.313653	0.12	2400000000000000	8300000	0.639746	0.191055	0.448163
617	600	300	29.5167	0.195042	0.387931	0.200281	0.12	2400000000000000	8300000	0.849328	2.79368	8.70009
618	600	300	44.9266	0.278591	0.456204	0.150525	0.12	2400000000000000	8300000	0.834569	5.36815	16.427
619	600	300	46.7738	0.386141	0.248775	0.297347	0.12	2400000000000000	8300000	0.706635	8.34458	21.6208
620	600	300	10.8345	0.295503	0.247617	0.26213	0.12	2400000000000000	8300000	0.785077	1.29794	3.73628
621	600	300	52.0909	0.344826	0.357825	0.475049	0.12	2400000000000000	8300000	0.750696	19.0703	52.4919
622	600	300	76.9413	0.102816	0.338654	0.273472	0.12	2400000000000000	8300000	0.815118	4.57592	13.6763
623	600	300	48.3134	0.141182	0.182056	0.109412	0.12	2400000000000000	8300000	0.837487	0.848603	2.60588
624	600	300	58.9856	0.187237	0.267912	0.199047	0.12	2400000000000000	8300000	0.669388	3.67851	9.02862
625	600	300	46.3237	0.28232	0.334856	0.475497	0.12	2400000000000000	8300000	0.86231	13.0058	41.1219
626	600	300	48.8342	0.102399	0.0753898	0.102693	0.12	2400000000000000	8300000	0.842809	0.241801	0.747238
627	600	300	60.3907	0.171747	0.184532	0.372762	0.12	2400000000000000	8300000	0.625367	4.45604	10.2178
628	600	300	13.4048	0.169554	0.0187573	0.482791	0.12	2400000000000000	8300000	0.615544	0.128554	0.290147
629	600	300	73.7646	0.106207	0.0190387	0.241489	0.12	2400000000000000	8300000	0.856427	0.224969	0.706454
630	600	300	42.6048	0.446722	0.184554	0.425372	0.12	2400000000000000	8300000	0.755377	9.33202	25.847
631	600	300	77.1086	0.385871	0.310161	0.44468	0.12	2400000000000000	8300000	0.743445	25.6311	69.8694
632	600	300	52.0546	0.389815	0.152995	0.252799	0.12	2400000000000000	8300000	0.861209	4.9018	15.4787
633	600	300	10.5123	0.139691	0.220296	0.377431	0.12	2400000000000000	8300000	0.852576	0.7626	2.38397
634	600	300	45.1597	0.170821	0.00723003	0.16461	0.12	2400000000000000	8300000	0.83928	0.0573424	0.176463
635	600	300	15.2595	0.176654	0.430475	0.363708	0.12	2400000000000000	8300000	0.695108	2.63603	6.71853
636	600	300	17.7157	0.113651	0.225803	0.163545	0.12	2400000000000000	8300000	0.690335	0.464394	1.17549
637	600	300	75.0249	0.430263	0.0893466	0.158798	0.12	2400000000000000	8300000	0.705712	2.86055	7.402
638	600	300	37.9205	0.260232	0.0253666	0.281685	0.12	2400000000000000	8300000	0.820403	0.440399	1.32478
639	600	300	45.0836	0.336101	0.343579	0.143696	0.12	2400000000000000	8300000	0.604967	4.67248	10.3645
640	600	300	74.8997	0.295367	0.370792	0.128244	0.12	2400000000000000	8300000	0.688869	6.57048	16.5961
641	600	300	65.9235	0.182132	0.152755	0.347627	0.12	2400000000000000	8300000	0.895361	3.98218	13.0735
642	600	300	65.9271	0.383496	0.0924663	0.259359	0.12	2400000000000000	8300000	0.600186	3.78701	8.33401
643	600	300	76.8742	0.325895	0.301545	0.19723	0.12	2400000000000000	8300000	0.68089	9.30618	23.2338
644	600	300	13.3573	0.203857	0.0375591	0.211227	0.12	2400000000000000	8300000	0.821119	0.134927	0.406233
645	600	300	58.3365	0.278835	0.0968249	0.122051	0.12	2400000000000000	8300000	0.877169	1.20061	3.86151
646	600	300	45.3211	0.133353	0.35816	0.312631	0.12	2400000000000000	8300000	0.825378	4.22669	12.7916
647	600	300	25.3433	0.292305	0.431342	0.109808	0.12	2400000000000000	8300000	0.785984	2.1915	6.31579
648	600	300	25.4481	0.377938	0.416596	0.343876	0.12	2400000000000000	8300000	0.637713	8.60556	20.1222
649	600	300	24.4347	0.183443	0.219878	0.415118	0.12	2400000000000000	8300000	0.660369	2.55534	6.18739
650	600	300	49.1799	0.214035	0.138821	0.357111	0.12	2400000000000000	8300000	0.887223	3.25925	10.6028
651	600	300	23.9963	0.398897	0.19394	0.420017	0.12	2400000000000000	8300000	0.771897	4.86996	13.7834
652	600	300	28.794	0.34868	0.209684	0.448224	0.12	2400000000000000	8300000	0.675152	5.89354	14.5898
653	600	300	50.9309	0.293959	0.446883	0.420637	0.12	2400000000000000	8300000	0.64401	17.5775	41.5069
654	600	300	10.0601	0.367125	0.138215	0.22186	0.12	2400000000000000	8300000	0.821128	0.707352	2.1297
655	600	300	18.8178	0.183017	0.164672	0.336556	0.12	2400000000000000	8300000	0.775295	1.19214	3.38894
656	600	300	69.1238	0.485739	0.207568	0.465169	0.12	2400000000000000	8300000	0.79228	20.2483	58.822
657	600	300	40.0601	0.105234	0.49134	0.271807	0.12	2400000000000000	8300000	0.863894	3.51639	11.1386
658	600	300	48.4425	0.215057	0.421794	0.473576	0.12	2400000000000000	8300000	0.725395	12.9974	34.5704
659	600	300	30.0065	0.420796	0.101748	0.102079	0.12	2400000000000000	8300000	0.64632	0.819104	1.94114
660	600	300	49.1926	0.299959	0.299696	0.171985	0.12	2400000000000000	8300000	0.632879	4.7503	11.0233
661	600	300	68.417	0.292239	0.138515	0.479884	0.12	2400000000000000	8300000	0.821087	8.30082	24.9909
662	600	300	46.518	0.226276	0.128249	0.449618	0.12	2400000000000000	8300000	0.637753	3.79091	8.86477
663	600	300	37.1619	0.203554	0.460463	0.125666	0.12	2400000000000000	8300000	0.604911	2.73387	6.06375
664	600	300	55.7554	0.373158	0.388774	0.310891	0.12	2400000000000000	8300000	0.753047	15.7062	43.3675
665	600	300	1.82352	0.258024	0.409048	0.316294	0.12	2400000000000000	8300000	0.684151	0.380211	0.95378
666	600	300	47.311	0.373671	0.17324	0.491586	0.12	2400000000000000	8300000	0.615423	9.40343	21.2193
667	600	300	46.9102	0.261368	0.169472	0.324896	0.12	2400000000000000	8300000	0.809029	4.21647	12.5079
668	600	300	17.867	0.218761	0.373981	0.400824	0.12	2400000000000000	8300000	0.706333	3.65942	9.47748
669	600	300	62.7592	0.486854	0.0633095	0.456348	0.12	2400000000000000	8300000	0.868891	5.51352	17.5657
670	600	300	4.6486	0.280245	0.285531	0.409435	0.12	2400000000000000	8300000	0.755937	0.951229	2.63659
671	600	300	44.48	0.449041	0.337715	0.165162	0.12	2400000000000000	8300000	0.75899	6.95823	19.3645
672	600	300	4.06011	0.176768	0.0861808	0.21509	0.12	2400000000000000	8300000	0.685282	0.0830923	0.208786
673	600	300	59.2942	0.422137	0.0158306	0.131907	0.12	2400000000000000	8300000	0.791393	0.326452	0.947289
674	600	300	64.0659	0.278363	0.145129	0.154812	0.12	2400000000000000	8300000	0.841492	2.50256	7.72156
675	600	300	7.12636	0.425684	0.246695	0.477294	0.12	2400000000000000	8300000	0.804617	2.23095	6.58188
676	600	300	68.0433	0.466243	0.00343824	0.131277	0.12	2400000000000000	8300000	0.643918	0.0894355	0.21116
677	600	300	35.6524	0.222154	0.151652	0.239755	0.12	2400000000000000	8300000	0.867455	1.79865	5.7209
678	600	300	50.7897	0.434404	0.357263	0.458864	0.12	2400000000000000	8300000	0.697368	22.5906	57.7646
679	600	300	72.373	0.185759	0.154684	0.207901	0.12	2400000000000000	8300000	0.855543	2.70031	8.47086
680	600	300	10.0762	0.409316	0.458037	0.386119	0.12	2400000000000000	8300000	0.837987	4.5558	13.9983
681	600	300	53.193	0.444448	0.112267	0.203964	0.12	2400000000000000	8300000	0.791094	3.38119	9.80774
682	600	300	42.0154	0.227913	0.318526	0.435571	0.12	2400000000000000	8300000	0.776001	8.29792	23.6104
683	600	300	4.64887	0.105402	0.169895	0.196313	0.12	2400000000000000	8300000	0.782563	0.102073	0.292888
684	600	300	48.7735	0.211282	0.0669267	0.348641	0.12	2400000000000000	8300000	0.645239	1.5018	3.55306
685	600	300	17.764	0.297754	0.00919901	0.20338	0.12	2400000000000000	8300000	0.620714	0.0618066	0.140669
686	600	300	54.0865	0.241754	0.197932	0.260284	0.12	2400000000000000	8300000	0.685085	4.20739	10.5689
687	600	300	73.2781	0.223244	0.347201	0.426535	0.12	2400000000000000	8300000	0.665245	15.1313	36.9087
688	600	300	23.5962	0.442327	0.476388	0.239625	0.12	2400000000000000	8300000	0.669176	7.44159	18.259
689	600	300	74.7608	0.222163	0.458263	0.302813	0.12	2400000000000000	8300000	0.898284	14.3953	47.4141
690	600	300	55.4296	0.185437	0.414653	0.452133	0.12	2400000000000000	8300000	0.767239	12.0358	33.8592
691	600	300	2.87387	0.27886	0.320609	0.22692	0.12	2400000000000000	8300000	0.866982	0.364157	1.15763
692	600	300	7.53813	0.204682	0.386691	0.306078	0.12	2400000000000000	8300000	0.79816	1.14058	3.33802
693	600	300	32.3813	0.336477	0.0521429	0.3081	0.12	2400000000000000	8300000	0.805879	1.09326	3.23046
694	600	300	4.08433	0.217743	0.257181	0.485237	0.12	2400000000000000	8300000	0.714271	0.69318	1.81543
695	600	300	78.0647	0.282186	0.0898814	0.327821	0.12	2400000000000000	8300000	0.718592	4.054	10.6816
696	600	300	22.8985	0.10374	0.135795	0.47696	0.12	2400000000000000	8300000	0.791895	0.960955	2.79025
697	600	300	8.17388	0.222534	0.313869	0.375792	0.12	2400000000000000	8300000	0.707826	1.34001	3.4778
698	600	300	25.0774	0.441628	0.0451566	0.167817	0.12	2400000000000000	8300000	0.884573	0.524183	1.70015
699	600	300	21.5951	0.423468	0.359728	0.180227	0.12	2400000000000000	8300000	0.645318	3.70303	8.76199
700	600	300	68.9636	0.105113	0.186011	0.175633	0.12	2400000000000000	8300000	0.633625	1.47914	3.43647
701	600	300	34.8238	0.444722	0.440794	0.293458	0.12	2400000000000000	8300000	0.761359	12.5122	34.9297
702	600	300	19.1182	0.372513	0.014543	0.209155	0.12	2400000000000000	8300000	0.714324	0.135299	0.354375
703	600	300	44.8226	0.475765	0.345633	0.122	0.12	2400000000000000	8300000	0.708996	5.61632	14.6005
704	600	300	55.9085	0.414367	0.0961057	0.273108	0.12	2400000000000000	8300000	0.753441	3.79782	10.4919
705	600	300	51.4633	0.385903	0.380079	0.433439	0.12	2400000000000000	8300000	0.750695	20.4345	56.2471
706	600	300	7.0737	0.416115	0.0077308	0.446114	0.12	2400000000000000	8300000	0.72615	0.0634041	0.168817
707	600	300	34.8313	0.498284	0.0321635	0.280489	0.12	2400000000000000	8300000	0.652466	0.977937	2.33959
708	600	300	5.89808	0.164002	0.425964	0.189596	0.12	2400000000000000	8300000	0.835532	0.487922	1.49481
709	600	300	10.0059	0.256887	0.0454358	0.173472	0.12	2400000000000000	8300000	0.667808	0.126535	0.309838
710	600	300	18.5313	0.356325	0.0460757	0.32738	0.12	2400000000000000	8300000	0.822439	0.622103	1.87602
711	600	300	18.574	0.392101	0.323406	0.29986	0.12	2400000000000000	8300000	0.77625	4.41121	12.5554
712	600	300	1.37419	0.447299	0.368124	0.415507	0.12	2400000000000000	8300000	0.716198	0.587223	1.54208
713	600	300	45.7411	0.28503	0.442763	0.333079	0.12	2400000000000000	8300000	0.704972	12.0089	31.0417
714	600	300	74.662	0.471758	0.37226	0.107269	0.12	2400000000000000	8300000	0.681745	8.78467	21.9593
715	600	300	74.566	0.362478	0.283538	0.297638	0.12	2400000000000000	8300000	0.87249	14.2466	45.5766
716	600	300	48.8974	0.170592	0.474102	0.215282	0.12	2400000000000000	8300000	0.765403	5.31752	14.9235
717	600	300	22.4852	0.368267	0.379442	0.29256	0.12	2400000000000000	8300000	0.824471	5.74126	17.3562
718	600	300	28.8371	0.137	0.0430203	0.346006	0.12	2400000000000000	8300000	0.633711	0.367296	0.853452
719	600	300	11.9478	0.482965	0.153006	0.331688	0.12	2400000000000000	8300000	0.831863	1.82906	5.57893
720	600	300	20.9538	0.369394	0.112933	0.419904	0.12	2400000000000000	8300000	0.632312	2.29251	5.31513
721	600	300	68.7524	0.132741	0.1614	0.123851	0.12	2400000000000000	8300000	0.874618	1.13941	3.65401
722	600	300	78.7635	0.150452	0.19419	0.305638	0.12	2400000000000000	8300000	0.788031	4.39281	12.6928
723	600	300	61.281	0.23017	0.178563	0.123663	0.12	2400000000000000	8300000	0.816042	1.94533	5.82072
724	600	300	70.5031	0.494771	0.115184	0.203459	0.12	2400000000000000	8300000	0.797425	5.10585	14.929
725	600	300	22.1932	0.254629	0.135857	0.115785	0.12	2400000000000000	8300000	0.705008	0.555203	1.43522
726	600	300	41.2317	0.159671	0.00438267	0.473437	0.12	2400000000000000	8300000	0.87361	0.085319	0.273297
727	600	300	26.6169	0.403437	0.0985156	0.310003	0.12	2400000000000000	8300000	0.638481	2.04829	4.79525
728	600	300	39.1371	0.439418	0.409309	0.242398	0.12	2400000000000000	8300000	0.713704	10.657	27.8884
729	600	300	60.0642	0.42434	0.298973	0.401947	0.12	2400000000000000	8300000	0.827969	19.1301	58.0769
730	600	300	23.9608	0.409251	0.307669	0.213965	0.12	2400000000000000	8300000	0.826823	4.03186	12.2233
731	600	300	17.6064	0.299224	0.416411	0.313505	0.12	2400000000000000	8300000	0.885176	4.29555	13.9418
732	600	300	12.5816	0.183803	0.487709	0.104358	0.12	2400000000000000	8300000	0.610147	0.735124	1.64463
733	600	300	41.569	0.378387	0.377702	0.212141	0.12	2400000000000000	8300000	0.688148	7.87167	19.8619
734	600	300	30.0885	0.307821	0.25165	0.471198	0.12	2400000000000000	8300000	0.739324	6.85941	18.5948
735	600	300	62.8105	0.20091	0.0521108	0.277626	0.12	2400000000000000	8300000	0.635006	1.14027	2.65495
736	600	300	47.1171	0.127728	0.467837	0.207917	0.12	2400000000000000	8300000	0.724893	3.65625	9.71808
737	600	300	47.9709	0.110402	0.436396	0.271676	0.12	2400000000000000	8300000	0.823788	3.9217	11.8457
738	600	300	14.5981	0.438414	0.479203	0.483961	0.12	2400000000000000	8300000	0.613012	9.27036	20.8371
739	600	300	35.9323	0.171944	0.298873	0.197264	0.12	2400000000000000	8300000	0.896326	2.27506	7.47706
740	600	300	75.8802	0.322942	0.0841867	0.206264	0.12	2400000000000000	8300000	0.636969	2.6577	6.2072
741	600	300	8.38179	0.28008	0.290852	0.489869	0.12	2400000000000000	8300000	0.780674	2.08909	5.97997
742	600	300	73.5335	0.333414	0.264529	0.249599	0.12	2400000000000000	8300000	0.854562	10.1105	31.6801
743	600	300	12.8684	0.105076	0.215558	0.319098	0.12	2400000000000000	8300000	0.897659	0.580902	1.91199
744	600	300	69.4629	0.289377	0.465255	0.388248	0.12	2400000000000000	8300000	0.844679	22.678	70.2374
745	600	300	75.5789	0.146506	0.424472	0.113883	0.12	2400000000000000	8300000	0.708104	3.3431	8.67995
746	600	300	27.96	0.383625	0.0665034	0.391732	0.12	2400000000000000	8300000	0.604233	1.74527	3.86669
747	600	300	21.3321	0.223843	0.00398077	0.123822	0.12	2400000000000000	8300000	0.748806	0.0147004	0.0403618
748	600	300	34.3403	0.126006	0.457447	0.431596	0.12	2400000000000000	8300000	0.88871	5.33581	17.3873
749	600	300	57.3911	0.381463	0.0709302	0.10022	0.12	2400000000000000	8300000	0.613115	0.972009	2.18516
750	600	300	35.7266	0.237956	0.153186	0.16016	0.12	2400000000000000	8300000	0.70759	1.30271	3.37988
751	600	300	65.3358	0.118742	0.423882	0.302373	0.12	2400000000000000	8300000	0.81257	6.21056	18.5039
752	600	300	68.0195	0.479781	0.166275	0.43472	0.12	2400000000000000	8300000	0.627212	14.7333	33.8833
753	600	300	74.7037	0.137309	0.373282	0.48451	0.12	2400000000000000	8300000	0.847479	11.5869	36.0053
754	600	300	7.77998	0.452812	0.010466	0.141635	0.12	2400000000000000	8300000	0.604054	0.0326164	0.0722409
755	600	300	49.4398	0.156334	0.199028	0.301235	0.12	2400000000000000	8300000	0.656647	2.89426	6.96852
756	600	300	37.3132	0.118656	0.0496919	0.363726	0.12	2400000000000000	8300000	0.892111	0.499804	1.63489
757	600	300	3.31136	0.200356	0.235142	0.342949	0.12	2400000000000000	8300000	0.650014	0.334161	0.796435
758	600	300	44.9613	0.101548	0.0039877	0.119927	0.12	2400000000000000	8300000	0.89199	0.0136376	0.0446035
759	600	300	44.1745	0.118779	0.000895928	0.354306	0.12	2400000000000000	8300000	0.782972	0.0104028	0.0298653
760	600	300	6.40171	0.376154	0.0641814	0.280242	0.12	2400000000000000	8300000	0.697221	0.270514	0.691564
761	600	300	6.08294	0.29493	0.359119	0.39994	0.12	2400000000000000	8300000	0.812292	1.60936	4.79332
762	600	300	72.2437	0.240887	0.35259	0.22866	0.12	2400000000000000	8300000	0.707041	8.76315	22.7183
763	600	300	45.8814	0.393683	0.482325	0.205775	0.12	2400000000000000	8300000	0.646936	11.197	26.5604
764	600	300	68.6066	0.450131	0.141686	0.176255	0.12	2400000000000000	8300000	0.846679	4.81681	14.9537
765	600	300	71.4132	0.224618	0.299425	0.3085	0.12	2400000000000000	8300000	0.817769	9.25451	27.7495
766	600	300	35.4961	0.16414	0.284144	0.171296	0.12	2400000000000000	8300000	0.776828	1.7712	5.04504
767	600	300	29.3968	0.413147	0.0901806	0.400707	0.12	2400000000000000	8300000	0.78997	2.74114	7.93986
768	600	300	56.7734	0.393915	0.251181	0.399535	0.12	2400000000000000	8300000	0.878617	14.0177	45.1592
769	600	300	55.3271	0.459994	0.313235	0.23418	0.12	2400000000000000	8300000	0.671132	11.66	28.693
770	600	300	24.1893	0.103121	0.116118	0.371164	0.12	2400000000000000	8300000	0.667333	0.671463	1.64299
771	600	300	11.5779	0.14975	0.0379506	0.311879	0.12	2400000000000000	8300000	0.74957	0.128171	0.352268
772	600	300	8.55082	0.146849	0.086584	0.460314	0.12	2400000000000000	8300000	0.651336	0.312578	0.746508
773	600	300	51.993	0.247922	0.0574552	0.134235	0.12	2400000000000000	8300000	0.876895	0.620931	1.99647
774	600	300	34.2848	0.376962	0.476812	0.242144	0.12	2400000000000000	8300000	0.833345	9.3198	28.4775
775	600	300	46.8663	0.150291	0.0160123	0.204506	0.12	2400000000000000	8300000	0.841053	0.144059	0.444257
776	600	300	64.7761	0.123392	0.23361	0.398272	0.12	2400000000000000	8300000	0.607619	4.64471	10.3481
777	600	300	29.1574	0.321469	0.0907389	0.229416	0.12	2400000000000000	8300000	0.706096	1.21869	3.1552
778	600	300	35.4709	0.479742	0.139856	0.201996	0.12	2400000000000000	8300000	0.683274	3.00256	7.52242
779	600	300	33.4246	0.232746	0.287603	0.121131	0.12	2400000000000000	8300000	0.683089	1.69271	4.23967
780	600	300	56.7612	0.435228	0.218111	0.172991	0.12	2400000000000000	8300000	0.635321	5.82179	13.5619
781	600	300	31.575	0.451405	0.380541	0.162838	0.12	2400000000000000	8300000	0.715556	5.51636	14.4733
782	600	300	68.9006	0.268094	0.302415	0.419696	0.12	2400000000000000	8300000	0.808932	14.6431	43.4327
783	600	300	39.0806	0.228246	0.0214703	0.479792	0.12	2400000000000000	8300000	0.8897	0.573908	1.87222
784	600	300	54.0587	0.152698	0.345275	0.368651	0.12	2400000000000000	8300000	0.701824	6.56248	16.8876
785	600	300	35.0329	0.207042	0.305213	0.42932	0.12	2400000000000000	8300000	0.721633	5.93617	15.707
786	600	300	30.0425	0.328668	0.0814977	0.451013	0.12	2400000000000000	8300000	0.699918	2.26681	5.81746
787	600	300	10.1471	0.474724	0.193744	0.47216	0.12	2400000000000000	8300000	0.731918	2.75225	7.38622
788	600	300	52.2685	0.280985	0.0050227	0.226023	0.12	2400000000000000	8300000	0.869465	0.104136	0.331989
789	600	300	12.2707	0.332685	0.236582	0.448366	0.12	2400000000000000	8300000	0.740447	2.70461	7.34294
790	600	300	59.2558	0.143482	0.413263	0.397903	0.12	2400000000000000	8300000	0.664987	8.73213	21.2914
791	600	300	72.4715	0.162214	0.105709	0.156175	0.12	2400000000000000	8300000	0.842149	1.21218	3.74306
792	600	300	41.1469	0.141778	0.262977	0.26983	0.12	2400000000000000	8300000	0.892354	2.58547	8.45956
793	600	300	7.67521	0.115365	0.400191	0.312917	0.12	2400000000000000	8300000	0.656309	0.692543	1.66658
794	600	300	42.0895	0.404726	0.440343	0.357603	0.12	2400000000000000	8300000	0.847675	16.7538	52.0732
795	600	300	30.9715	0.115668	0.0126552	0.335254	0.12	2400000000000000	8300000	0.701548	0.0949307	0.244195
796	600	300	77.0621	0.281825	0.224323	0.243525	0.12	2400000000000000	8300000	0.833269	7.41011	22.6403
797	600	300	63.4777	0.172878	0.292299	0.148439	0.12	2400000000000000	8300000	0.651559	2.97387	7.10473
798	600	300	47.7734	0.425343	0.101817	0.381113	0.12	2400000000000000	8300000	0.789245	4.92479	14.2519
799	600	300	7.46684	0.208729	0.0484346	0.274875	0.12	2400000000000000	8300000	0.777182	0.129598	0.36931
800	600	300	56.8558	0.218841	0.017712	0.234317	0.12	2400000000000000	8300000	0.896592	0.322522	1.06029
801	600	300	6.65175	0.385868	0.334782	0.247851	0.12	2400000000000000	8300000	0.632258	1.33019	3.08376
802	600	300	28.7496	0.319325	0.25443	0.302718	0.12	2400000000000000	8300000	0.889414	4.41628	14.4023
803	600	300	37.3506	0.236056	0.0568215	0.146197	0.12	2400000000000000	8300000	0.831328	0.457457	1.39442
804	600	300	1.60089	0.322989	0.289629	0.242718	0.12	2400000000000000	8300000	0.889596	0.227028	0.740533
805	600	300	51.5779	0.214181	0.0850667	0.425158	0.12	2400000000000000	8300000	0.790191	2.49542	7.23013
806	600	300	63.9674	0.301499	0.432653	0.279435	0.12	2400000000000000	8300000	0.739365	14.5631	39.4805
807	600	300	43.4201	0.428644	0.30948	0.116804	0.12	2400000000000000	8300000	0.723553	4.20208	11.1482
808	600	300	2.12805	0.388224	0.262357	0.366861	0.12	2400000000000000	8300000	0.794823	0.496644	1.44739
809	600	300	74.8663	0.183956	0.406446	0.363857	0.12	2400000000000000	8300000	0.699839	12.721	32.6431
810	600	300	27.2505	0.316584	0.0873388	0.260491	0.12	2400000000000000	8300000	0.863356	1.22588	3.88071
811	600	300	34.1742	0.371151	0.0410397	0.165861	0.12	2400000000000000	8300000	0.775671	0.539242	1.53367
812	600	300	42.8322	0.468431	0.347565	0.399182	0.12	2400000000000000	8300000	0.658804	17.3864	41.9988
813	600	300	6.38131	0.278782	0.486515	0.160295	0.12	2400000000000000	8300000	0.750885	0.86652	2.38574
814	600	300	46.3796	0.351959	0.396986	0.116776	0.12	2400000000000000	8300000	0.653885	4.72643	11.332
815	600	300	15.4276	0.473945	0.0457896	0.226848	0.12	2400000000000000	8300000	0.785263	0.474367	1.36584
816	600	300	79.1733	0.489549	0.463743	0.217567	0.12	2400000000000000	8300000	0.837543	24.4249	75.0086
817	600	300	34.8082	0.399066	0.498724	0.285735	0.12	2400000000000000	8300000	0.803901	12.3634	36.4427
818	600	300	25.5454	0.301821	0.103341	0.15089	0.12	2400000000000000	8300000	0.788853	0.750901	2.17195
819	600	300	25.0282	0.354424	0.336059	0.343167	0.12	2400000000000000	8300000	0.627609	6.3894	14.7035
820	600	300	45.8232	0.265286	0.330549	0.274478	0.12	2400000000000000	8300000	0.666239	6.88858	16.828
821	600	300	4.86916	0.476011	0.240579	0.374653	0.12	2400000000000000	8300000	0.650513	1.3048	3.11224
822	600	300	43.0438	0.420877	0.314993	0.249611	0.12	2400000000000000	8300000	0.715494	8.89646	23.3397
823	600	300	4.18667	0.140679	0.247751	0.220958	0.12	2400000000000000	8300000	0.825101	0.201377	0.609239
824	600	300	57.3972	0.23636	0.333397	0.218762	0.12	2400000000000000	8300000	0.713074	6.17996	16.1582
825	600	300	10.2103	0.280212	0.389244	0.260427	0.12	2400000000000000	8300000	0.753959	1.81142	5.00769
826	600	300	73.5041	0.482448	0.0415652	0.182724	0.12	2400000000000000	8300000	0.630591	1.68219	3.8895
827	600	300	20.0932	0.422367	0.116818	0.399652	0.12	2400000000000000	8300000	0.664693	2.47468	6.03132
828	600	300	21.1212	0.382251	0.344492	0.145653	0.12	2400000000000000	8300000	0.647152	2.53019	6.00386
829	600	300	25.5219	0.114054	0.373712	0.359669	0.12	2400000000000000	8300000	0.696982	2.44371	6.24515
830	600	300	27.2126	0.223854	0.463973	0.330606	0.12	2400000000000000	8300000	0.765433	5.83613	16.3796
831	600	300	65.658	0.273089	0.212911	0.409875	0.12	2400000000000000	8300000	0.895546	9.77303	32.0914
832	600	300	23.3243	0.201943	0.368513	0.438721	0.12	2400000000000000	8300000	0.669549	4.75627	11.6767
833	600	300	57.318	0.311894	0.484279	0.394306	0.12	2400000000000000	8300000	0.707361	21.3213	55.3001
834	600	300	44.0075	0.468974	0.323482	0.309541	0.12	2400000000000000	8300000	0.60171	12.9072	28.4767
835	600	300	17.2229	0.252797	0.183266	0.15864	0.12	2400000000000000	8300000	0.639752	0.790604	1.85457
836	600	300	55.5554	0.41712	0.24046	0.382896	0.12	2400000000000000	8300000	0.736171	13.3259	35.9706
837	600	300	61.7951	0.306351	0.423994	0.291009	0.12	2400000000000000	8300000	0.767996	14.589	41.0825
838	600	300	14.726	0.340526	0.410461	0.303352	0.12	2400000000000000	8300000	0.824936	3.89979	11.7959
839	600	300	27.0693	0.49317	0.390812	0.270626	0.12	2400000000000000	8300000	0.81656	8.81855	26.4032
840	600	300	57.2554	0.378276	0.24914	0.300516	0.12	2400000000000000	8300000	0.602963	10.128	22.3916
841	600	300	63.2852	0.311336	0.137579	0.124646	0.12	2400000000000000	8300000	0.628864	2.11032	4.86604
842	600	300	15.6025	0.122506	0.133833	0.221139	0.12	2400000000000000	8300000	0.615057	0.353317	0.796804
843	600	300	26.001	0.312071	0.188094	0.33051	0.12	2400000000000000	8300000	0.794007	3.15058	9.17247
844	600	300	60.8918	0.21201	0.482958	0.135881	0.12	2400000000000000	8300000	0.728855	5.29137	14.141
845	600	300	3.67063	0.474973	0.230836	0.483577	0.12	2400000000000000	8300000	0.747632	1.21553	3.33216
846	600	300	75.2479	0.213659	0.220112	0.317526	0.12	2400000000000000	8300000	0.840738	7.01819	21.635
847	600	300	75.5658	0.256168	0.382107	0.320381	0.12	2400000000000000	8300000	0.619476	14.8009	33.6189
848	600	300	63.6375	0.490095	0.201828	0.33165	0.12	2400000000000000	8300000	0.874224	13.0389	41.796
849	600	300	5.27163	0.148018	0.254022	0.383233	0.12	2400000000000000	8300000	0.646009	0.474438	1.1238
850	600	300	58.1404	0.400137	0.367905	0.305382	0.12	2400000000000000	8300000	0.745397	16.325	44.6182
851	600	300	66.8187	0.141239	0.0750493	0.275234	0.12	2400000000000000	8300000	0.614376	1.21756	2.7428
852	600	300	71.7935	0.329978	0.280916	0.432127	0.12	2400000000000000	8300000	0.721845	17.9616	47.5401
853	600	300	9.562	0.123849	0.396661	0.322546	0.12	2400000000000000	8300000	0.795041	0.94632	2.75866
854	600	300	43.7332	0.188893	0.285143	0.12915	0.12	2400000000000000	8300000	0.885044	1.90007	6.16604
855	600	300	50.5562	0.255752	0.43332	0.160335	0.12	2400000000000000	8300000	0.609937	5.61071	12.548
856	600	300	8.3156	0.471923	0.341042	0.285921	0.12	2400000000000000	8300000	0.605464	2.39004	5.30597
857	600	300	71.1892	0.280746	0.444321	0.24327	0.12	2400000000000000	8300000	0.842487	13.4927	41.6806
858	600	300	36.4013	0.15993	0.388923	0.299023	0.12	2400000000000000	8300000	0.677371	4.22865	10.5027
859	600	300	52.0529	0.245222	0.281959	0.183811	0.12	2400000000000000	8300000	0.861268	4.1319	13.0485
860	600	300	76.1195	0.497982	0.106281	0.170131	0.12	2400000000000000	8300000	0.721805	4.2809	11.3299
861	600	300	33.7689	0.425391	0.208064	0.446113	0.12	2400000000000000	8300000	0.857068	8.32786	26.171
862	600	300	60.185	0.40548	0.0349037	0.165465	0.12	2400000000000000	8300000	0.860873	0.880284	2.77864
863	600	300	28.2027	0.318028	0.117971	0.134206	0.12	2400000000000000	8300000	0.878389	0.886924	2.85657
864	600	300	58.5403	0.427132	0.155215	0.135624	0.12	2400000000000000	8300000	0.800607	3.28757	9.65085
865	600	300	25.4745	0.152449	0.291895	0.413701	0.12	2400000000000000	8300000	0.796068	2.92908	8.54973
866	600	300	5.60784	0.218916	0.021601	0.382421	0.12	2400000000000000	8300000	0.750977	0.0633394	0.174411
867	600	300	61.2982	0.354517	0.196281	0.193193	0.12	2400000000000000	8300000	0.831734	5.14687	15.6963
868	600	300	12.4999	0.297525	0.104161	0.478246	0.12	2400000000000000	8300000	0.697862	1.15711	2.96085
869	600	300	27.5324	0.296367	0.145522	0.296167	0.12	2400000000000000	8300000	0.706042	2.19647	5.68628
870	600	300	37.9071	0.234818	0.141924	0.351045	0.12	2400000000000000	8300000	0.858262	2.76986	8.71665
871	600	300	52.095	0.344578	0.483879	0.437731	0.12	2400000000000000	8300000	0.703537	23.7473	61.2594
872	600	300	74.9216	0.10286	0.122704	0.22719	0.12	2400000000000000	8300000	0.772341	1.3418	3.79986
873	600	300	76.3091	0.385823	0.225979	0.334286	0.12	2400000000000000	8300000	0.615092	13.8911	31.3291
874	600	300	70.6587	0.123623	0.337243	0.339443	0.12	2400000000000000	8300000	0.683119	6.24538	15.6432
875	600	300	2.24683	0.48243	0.209826	0.219714	0.12	2400000000000000	8300000	0.884923	0.312111	1.01271
876	600	300	36.8909	0.444536	0.0434011	0.226923	0.12	2400000000000000	8300000	0.890982	1.00877	3.29558
877	600	300	5.07326	0.139721	0.273231	0.43266	0.12	2400000000000000	8300000	0.796646	0.523376	1.5288
878	600	300	76.0478	0.22256	0.0442623	0.322513	0.12	2400000000000000	8300000	0.642439	1.50905	3.55472
879	600	300	28.1762	0.406403	0.0644623	0.373964	0.12	2400000000000000	8300000	0.836862	1.72409	5.29038
880	600	300	40.786	0.488297	0.18497	0.176446	0.12	2400000000000000	8300000	0.649661	4.05971	9.6706
881	600	300	43.6689	0.293727	0.301416	0.138094	0.12	2400000000000000	8300000	0.640493	3.33461	7.83125
882	600	300	3.00596	0.48547	0.335725	0.459825	0.12	2400000000000000	8300000	0.621854	1.40705	3.20826
883	600	300	36.6394	0.15223	0.0721879	0.458118	0.12	2400000000000000	8300000	0.76924	1.15206	3.24945
884	600	300	40.3222	0.298454	0.327322	0.178597	0.12	2400000000000000	8300000	0.604008	4.39395	9.73127
885	600	300	76.5392	0.188331	0.352257	0.182388	0.12	2400000000000000	8300000	0.694101	5.78427	14.7212
886	600	300	56.6876	0.273373	0.3588	0.382458	0.12	2400000000000000	8300000	0.658147	13.2821	32.0524
887	600	300	36.5545	0.382633	0.36636	0.153989	0.12	2400000000000000	8300000	0.719796	4.92842	13.0074
888	600	300	7.61109	0.283351	0.492884	0.358481	0.12	2400000000000000	8300000	0.820891	2.37996	7.16352
889	600	300	60.6891	0.499923	0.11294	0.270065	0.12	2400000000000000	8300000	0.70847	5.77985	15.0145
890	600	300	62.5076	0.171245	0.378329	0.163839	0.12	2400000000000000	8300000	0.676725	4.14407	10.2828
891	600	300	26.384	0.225647	0.0614381	0.377633	0.12	2400000000000000	8300000	0.711298	0.86271	2.25003
892	600	300	70.9152	0.421305	0.0533297	0.168176	0.12	2400000000000000	8300000	0.660292	1.67361	4.05193
893	600	300	25.4842	0.284351	0.46967	0.186503	0.12	2400000000000000	8300000	0.815918	3.96452	11.8606
894	600	300	62.5132	0.105373	0.350486	0.349499	0.12	2400000000000000	8300000	0.662048	5.0397	12.2339
895	600	300	27.9453	0.233153	0.0703034	0.129799	0.12	2400000000000000	8300000	0.838925	0.371349	1.14229
896	600	300	40.7771	0.178755	0.142957	0.2437	0.12	2400000000000000	8300000	0.754095	1.58608	4.38553
897	600	300	38.6505	0.148559	0.256197	0.14078	0.12	2400000000000000	8300000	0.716615	1.29347	3.39872
898	600	300	65.6847	0.367333	0.101573	0.283319	0.12	2400000000000000	8300000	0.74739	4.33676	11.8846
899	600	300	58.0712	0.190088	0.377831	0.480058	0.12	2400000000000000	8300000	0.871988	12.5053	39.983
900	600	300	36.725	0.423884	0.115142	0.475149	0.12	2400000000000000	8300000	0.850084	5.31933	16.5802
901	600	300	60.7716	0.128944	0.258228	0.373449	0.12	2400000000000000	8300000	0.828895	4.71981	14.3448
902	600	300	54.9643	0.323427	0.220032	0.274302	0.12	2400000000000000	8300000	0.665792	6.7013	16.3595
903	600	300	67.098	0.36409	0.45397	0.446985	0.12	2400000000000000	8300000	0.622163	30.9617	70.6318
904	600	300	35.4916	0.331905	0.154311	0.166127	0.12	2400000000000000	8300000	0.74839	1.8861	5.17564
905	600	300	31.6045	0.220165	0.419469	0.180994	0.12	2400000000000000	8300000	0.748469	3.2995	9.0551
906	600	300	56.7548	0.42969	0.262369	0.315684	0.12	2400000000000000	8300000	0.783085	12.6157	36.2235
907	600	300	37.9225	0.354658	0.33971	0.214227	0.12	2400000000000000	8300000	0.628561	6.1133	14.0895
908	600	300	75.3157	0.223764	0.0553532	0.461312	0.12	2400000000000000	8300000	0.736404	2.68782	7.25751
909	600	300	37.3582	0.456791	0.170142	0.182787	0.12	2400000000000000	8300000	0.85041	3.31473	10.3359
910	600	300	23.8002	0.397668	0.0553793	0.128766	0.12	2400000000000000	8300000	0.731087	0.421536	1.12999
911	600	300	11.1356	0.462216	0.473705	0.405542	0.12	2400000000000000	8300000	0.61007	6.17574	13.8147
912	600	300	47.0607	0.274266	0.0705514	0.11427	0.12	2400000000000000	8300000	0.790942	0.649911	1.88482
913	600	300	20.2567	0.288187	0.0260259	0.179494	0.12	2400000000000000	8300000	0.688236	0.170328	0.429828
914	600	300	1.3567	0.48011	0.0901063	0.118696	0.12	2400000000000000	8300000	0.737817	0.0435114	0.117712
915	600	300	72.3543	0.47687	0.492939	0.318902	0.12	2400000000000000	8300000	0.882596	33.8767	109.631
916	600	300	62.9188	0.146815	0.228516	0.499844	0.12	2400000000000000	8300000	0.600472	6.59004	14.5095
917	600	300	67.6129	0.262887	0.143441	0.373242	0.12	2400000000000000	8300000	0.75664	5.94362	16.4897
918	600	300	45.2568	0.139915	0.417892	0.163304	0.12	2400000000000000	8300000	0.852308	2.69896	8.4346
919	600	300	27.0096	0.254335	0.122004	0.287995	0.12	2400000000000000	8300000	0.668069	1.50755	3.69287
920	600	300	78.8956	0.4821	0.467691	0.426086	0.12	2400000000000000	8300000	0.784266	47.3405	136.134
921	600	300	21.3434	0.215115	0.462151	0.163901	0.12	2400000000000000	8300000	0.674175	2.17213	5.36945
922	600	300	17.6587	0.298787	0.349131	0.163185	0.12	2400000000000000	8300000	0.746856	1.87748	5.14143
923	600	300	51.6363	0.333346	0.416432	0.207107	0.12	2400000000000000	8300000	0.656984	9.27206	22.3359
924	600	300	69.7561	0.457983	0.302056	0.342166	0.12	2400000000000000	8300000	0.853775	20.6225	64.5589
925	600	300	25.4246	0.426698	0.0369229	0.477106	0.12	2400000000000000	8300000	0.795222	1.19364	3.48042
926	600	300	5.61351	0.303985	0.225902	0.158248	0.12	2400000000000000	8300000	0.849768	0.381006	1.18714
927	600	300	2.85277	0.248722	0.0322396	0.461771	0.12	2400000000000000	8300000	0.652353	0.0659757	0.157811
928	600	300	76.4062	0.290593	0.407692	0.306451	0.12	2400000000000000	8300000	0.858448	17.3259	54.5356
929	600	300	18.7702	0.476745	0.185498	0.41116	0.12	2400000000000000	8300000	0.681194	4.26275	10.6471
930	600	300	6.06545	0.489806	0.314377	0.47527	0.12	2400000000000000	8300000	0.714691	2.77245	7.26531
931	600	300	50.7134	0.466436	0.0471178	0.212958	0.12	2400000000000000	8300000	0.861769	1.48246	4.6843
932	600	300	42.2762	0.11398	0.276525	0.245424	0.12	2400000000000000	8300000	0.685711	2.04252	5.13544
933	600	300	58.2886	0.461825	0.0596383	0.24574	0.12	2400000000000000	8300000	0.692338	2.46404	6.25515
934	600	300	34.1211	0.409825	0.457291	0.334944	0.12	2400000000000000	8300000	0.712204	13.3775	34.9341
935	600	300	43.8981	0.159718	0.355086	0.27475	0.12	2400000000000000	8300000	0.77983	4.27227	12.216
936	600	300	66.8328	0.44925	0.359075	0.406055	0.12	2400000000000000	8300000	0.724496	27.3423	72.6343
937	600	300	42.5682	0.393379	0.157674	0.45434	0.12	2400000000000000	8300000	0.698201	7.49248	19.1813
938	600	300	8.47034	0.456553	0.0612046	0.396242	0.12	2400000000000000	8300000	0.831102	0.585766	1.78505
939	600	300	73.8272	0.493696	0.174992	0.448129	0.12	2400000000000000	8300000	0.779768	17.8519	51.0413
940	600	300	44.057	0.213834	0.0884995	0.361997	0.12	2400000000000000	8300000	0.720822	1.88506	4.98223
941	600	300	79.1279	0.399076	0.00219944	0.141576	0.12	2400000000000000	8300000	0.86859	0.0614148	0.195596
942	600	300	58.8461	0.285178	0.497777	0.124493	0.12	2400000000000000	8300000	0.898187	6.49532	21.3914
943	600	300	24.978	0.148729	0.390534	0.224494	0.12	2400000000000000	8300000	0.773891	2.03425	5.77239
944	600	300	73.0423	0.460278	0.0857742	0.254461	0.12	2400000000000000	8300000	0.74798	4.5831	12.5696
945	600	300	69.9129	0.48141	0.273687	0.190739	0.12	2400000000000000	8300000	0.71529	10.9737	28.7811
946	600	300	78.1764	0.34723	0.232519	0.252519	0.12	2400000000000000	8300000	0.848355	9.9548	30.9657
947	600	300	9.63537	0.420214	0.0439974	0.265639	0.12	2400000000000000	8300000	0.823855	0.295558	0.892823
948	600	300	67.0298	0.116376	0.0790884	0.285328	0.12	2400000000000000	8300000	0.864114	1.09945	3.48351
949	600	300	60.989	0.185843	0.160545	0.231729	0.12	2400000000000000	8300000	0.743494	2.63369	7.17982
950	600	300	18.5691	0.331995	0.331774	0.138179	0.12	2400000000000000	8300000	0.742136	1.7652	4.80341
951	600	300	4.48409	0.458476	0.459146	0.263043	0.12	2400000000000000	8300000	0.626215	1.5508	3.56081
952	600	300	9.34819	0.442277	0.130827	0.300478	0.12	2400000000000000	8300000	0.838562	1.01513	3.12124
953	600	300	33.8582	0.345876	0.121357	0.350687	0.12	2400000000000000	8300000	0.604899	3.11283	6.90414
954	600	300	60.7578	0.45692	0.461577	0.253014	0.12	2400000000000000	8300000	0.601443	20.2497	44.6565
955	600	300	67.646	0.192375	0.424936	0.291569	0.12	2400000000000000	8300000	0.779272	10.0703	28.7741
956	600	300	45.8028	0.317676	0.134617	0.109251	0.12	2400000000000000	8300000	0.688777	1.33656	3.37551
957	600	300	56.5298	0.356844	0.162143	0.191114	0.12	2400000000000000	8300000	0.655959	3.90422	9.39037
958	600	300	55.6003	0.291915	0.0607866	0.328651	0.12	2400000000000000	8300000	0.72561	2.02518	5.38814
959	600	300	7.65289	0.461694	0.0331919	0.278175	0.12	2400000000000000	8300000	0.756147	0.203759	0.564929
960	600	300	41.02	0.135297	0.391362	0.170702	0.12	2400000000000000	8300000	0.632295	2.31574	5.36885
961	600	300	42.3829	0.444211	0.0696547	0.177437	0.12	2400000000000000	8300000	0.642527	1.45332	3.42393
962	600	300	7.48121	0.192628	0.0558509	0.358246	0.12	2400000000000000	8300000	0.78424	0.18009	0.517857
963	600	300	11.3095	0.198722	0.04889	0.401134	0.12	2400000000000000	8300000	0.77756	0.275287	0.784859
964	600	300	35.8677	0.498268	0.336032	0.204404	0.12	2400000000000000	8300000	0.734763	7.66696	20.6558
965	600	300	37.1502	0.478079	0.200469	0.45846	0.12	2400000000000000	8300000	0.665659	10.1952	24.884
966	600	300	54.7801	0.120187	0.469852	0.379208	0.12	2400000000000000	8300000	0.721671	7.32668	19.3873
967	600	300	75.4184	0.491947	0.01993	0.434736	0.12	2400000000000000	8300000	0.635587	2.00777	4.67909
968	600	300	13.789	0.23324	0.0986665	0.104681	0.12	2400000000000000	8300000	0.845952	0.207471	0.64354
969	600	300	75.2558	0.132314	0.418488	0.133003	0.12	2400000000000000	8300000	0.819963	3.4616	10.4074
970	600	300	26.4724	0.330832	0.383569	0.304764	0.12	2400000000000000	8300000	0.795448	6.39431	18.6499
971	600	300	38.9073	0.357445	0.476036	0.284441	0.12	2400000000000000	8300000	0.815708	11.7614	35.1774
972	600	300	22.9213	0.310158	0.0694519	0.219985	0.12	2400000000000000	8300000	0.66652	0.678401	1.65795
973	600	300	58.8889	0.372034	0.0165513	0.1657	0.12	2400000000000000	8300000	0.680938	0.375283	0.936997
974	600	300	16.2073	0.390237	0.136482	0.427066	0.12	2400000000000000	8300000	0.814866	2.30247	6.87943
975	600	300	44.2283	0.298267	0.46779	0.34692	0.12	2400000000000000	8300000	0.80694	13.3713	39.5627
976	600	300	58.5294	0.442984	0.06717	0.171451	0.12	2400000000000000	8300000	0.697488	1.86494	4.76951
977	600	300	45.4283	0.324944	0.280628	0.321424	0.12	2400000000000000	8300000	0.827427	8.31629	25.2308
978	600	300	11.8845	0.271257	0.135113	0.363813	0.12	2400000000000000	8300000	0.777031	0.989747	2.8199
979	600	300	28.7759	0.391366	0.162198	0.304284	0.12	2400000000000000	8300000	0.705446	3.47155	8.97964
980	600	300	40.0328	0.188375	0.44572	0.213492	0.12	2400000000000000	8300000	0.855661	4.48196	14.0618
981	600	300	65.3703	0.311476	0.218944	0.238338	0.12	2400000000000000	8300000	0.603467	6.63619	14.684
982	600	300	13.3535	0.118482	0.190038	0.461084	0.12	2400000000000000	8300000	0.731932	0.865876	2.3238
983	600	300	19.4453	0.428323	0.345094	0.172168	0.12	2400000000000000	8300000	0.880797	3.09073	9.98178
984	600	300	34.3986	0.387797	0.286446	0.383269	0.12	2400000000000000	8300000	0.848911	9.147	28.4716
985	600	300	68.2106	0.290925	0.223736	0.426051	0.12	2400000000000000	8300000	0.64963	11.8146	28.142
986	600	300	50.6644	0.150317	0.0692216	0.343178	0.12	2400000000000000	8300000	0.612041	1.12995	2.53578
987	600	300	66.3677	0.456591	0.453527	0.341006	0.12	2400000000000000	8300000	0.882037	29.2709	94.6662
988	600	300	72.1556	0.459416	0.483739	0.31363	0.12	2400000000000000	8300000	0.882188	31.4117	101.607
989	600	300	21.0897	0.336359	0.410005	0.215235	0.12	2400000000000000	8300000	0.634978	3.90987	9.10318
990	600	300	23.8728	0.213023	0.315584	0.108201	0.12	2400000000000000	8300000	0.814198	1.08459	3.23792
991	600	300	36.6059	0.319417	0.0742509	0.25609	0.12	2400000000000000	8300000	0.718379	1.38865	3.65778
992	600	300	25.5007	0.327569	0.427236	0.149611	0.12	2400000000000000	8300000	0.649993	3.33483	7.94791
993	600	300	54.1684	0.228204	0.26556	0.289957	0.12	2400000000000000	8300000	0.673617	5.94501	14.6838
994	600	300	63.3848	0.180046	0.363517	0.112628	0.12	2400000000000000	8300000	0.721474	2.91826	7.71998
995	600	300	76.3093	0.29223	0.281918	0.257173	0.12	2400000000000000	8300000	0.856751	10.0981	31.7222
996	600	300	37.9057	0.122782	0.413923	0.477954	0.12	2400000000000000	8300000	0.67267	5.75085	14.1842
997	600	300	5.07223	0.472374	0.292586	0.467077	0.12	2400000000000000	8300000	0.69709	2.0451	5.22726
998	600	300	68.9572	0.286497	0.12558	0.208823	0.12	2400000000000000	8300000	0.671085	3.23583	7.96223
999	600	300	32.8152	0.273738	0.362847	0.369533	0.12	2400000000000000	8300000	0.613781	7.52272	16.9301
1000	600	300	62.3533	0.107412	0.0369957	0.431334	0.12	2400000000000000	8300000	0.773557	0.667523	1.89335
1001	600	300	67.5195	0.106192	0.317626	0.145063	0.12	2400000000000000	8300000	0.759785	2.06339	5.74836
1002	600	300	51.3635	0.240924	0.306801	0.177987	0.12	2400000000000000	8300000	0.825267	4.22054	12.7713
1003	600	300	61.5055	0.495473	0.459802	0.499656	0.12	2400000000000000	8300000	0.841894	43.7283	134.987
1004	600	300	36.8367	0.405724	0.136829	0.240903	0.12	2400000000000000	8300000	0.680004	3.07694	7.67188
1005	600	300	35.0467	0.477394	0.396859	0.267381	0.12	2400000000000000	8300000	0.656979	11.0886	26.7116
1006	600	300	43.2	0.321499	0.164159	0.344964	0.12	2400000000000000	8300000	0.676137	4.91235	12.1785
1007	600	300	65.9809	0.425191	0.273386	0.110969	0.12	2400000000000000	8300000	0.816846	5.3158	15.9214
1008	600	300	1.81882	0.324301	0.355032	0.35145	0.12	2400000000000000	8300000	0.668684	0.459682	1.12707
1009	600	300	43.7292	0.244625	0.278837	0.377221	0.12	2400000000000000	8300000	0.841742	7.02757	21.6898
1010	600	300	54.5992	0.105373	0.100633	0.13629	0.12	2400000000000000	8300000	0.82657	0.492843	1.49369
1011	600	300	65.8492	0.268835	0.267417	0.367616	0.12	2400000000000000	8300000	0.837138	10.8694	33.3637
1012	600	300	22.4744	0.108535	0.459134	0.285664	0.12	2400000000000000	8300000	0.808297	1.9982	5.92218
1013	600	300	50.5024	0.478856	0.472484	0.24349	0.12	2400000000000000	8300000	0.838695	17.3769	53.4377
1014	600	300	54.9178	0.425574	0.411877	0.357759	0.12	2400000000000000	8300000	0.674727	21.5096	53.2148
1015	600	300	22.3906	0.157358	0.353049	0.210133	0.12	2400000000000000	8300000	0.866693	1.63256	5.18808
1016	600	300	36.5645	0.327223	0.201436	0.435486	0.12	2400000000000000	8300000	0.747951	6.55543	17.9782
1017	600	300	32.2123	0.27231	0.356599	0.299119	0.12	2400000000000000	8300000	0.663581	5.84381	14.2188
1018	600	300	19.2411	0.371128	0.481667	0.222694	0.12	2400000000000000	8300000	0.836226	4.78404	14.6686
1019	600	300	39.263	0.203149	0.0994649	0.304493	0.12	2400000000000000	8300000	0.791502	1.5088	4.3788
1020	600	300	23.038	0.294335	0.0737129	0.489257	0.12	2400000000000000	8300000	0.726189	1.5274	4.067
1021	600	300	74.9573	0.478849	0.344318	0.145786	0.12	2400000000000000	8300000	0.638403	11.2531	26.3415
1022	600	300	41.6981	0.364317	0.241963	0.110152	0.12	2400000000000000	8300000	0.836901	2.52885	7.7601
1023	600	300	49.3825	0.424982	0.306247	0.285768	0.12	2400000000000000	8300000	0.78155	11.4714	32.8733
1024	600	300	43.9637	0.448145	0.243922	0.477153	0.12	2400000000000000	8300000	0.74593	14.3221	39.1721
1025	600	300	25.0321	0.200532	0.388724	0.391659	0.12	2400000000000000	8300000	0.762727	4.77327	13.3492
1026	600	300	72.1151	0.338417	0.174846	0.24841	0.12	2400000000000000	8300000	0.788829	6.62047	19.1489
1027	600	300	68.0552	0.100115	0.269925	0.475975	0.12	2400000000000000	8300000	0.816265	5.46732	16.3635
1028	600	300	7.63873	0.27009	0.106938	0.399731	0.12	2400000000000000	8300000	0.638037	0.550831	1.28865
1029	600	300	15.658	0.363049	0.0354194	0.300077	0.12	2400000000000000	8300000	0.760531	0.377366	1.05233
1030	600	300	20.8729	0.335938	0.0326053	0.300184	0.12	2400000000000000	8300000	0.772774	0.428653	1.21459
1031	600	300	26.5792	0.162248	0.444115	0.449402	0.12	2400000000000000	8300000	0.698128	5.37574	13.7608
1032	600	300	60.1275	0.490637	0.242874	0.272645	0.12	2400000000000000	8300000	0.635855	12.2011	28.4464
1033	600	300	67.9358	0.295962	0.0532055	0.377461	0.12	2400000000000000	8300000	0.689874	2.52203	6.37957
1034	600	300	15.3855	0.272804	0.219857	0.438148	0.12	2400000000000000	8300000	0.829478	2.52529	7.68045
1035	600	300	37.1901	0.270265	0.211348	0.417118	0.12	2400000000000000	8300000	0.696288	5.53428	14.1293
1036	600	300	35.2441	0.352384	0.068861	0.464517	0.12	2400000000000000	8300000	0.798017	2.48121	7.26018
1037	600	300	16.7612	0.122075	0.412859	0.319245	0.12	2400000000000000	8300000	0.738869	1.6844	4.56335
1038	600	300	48.1105	0.184762	0.297073	0.298663	0.12	2400000000000000	8300000	0.72696	4.92588	13.13
1039	600	300	15.5559	0.468875	0.025153	0.21039	0.12	2400000000000000	8300000	0.736026	0.241075	0.650605
1040	600	300	35.7006	0.314442	0.494676	0.221175	0.12	2400000000000000	8300000	0.845781	7.67115	23.7897
1041	600	300	28.7283	0.219767	0.48233	0.296044	0.12	2400000000000000	8300000	0.662795	5.63068	13.684
1042	600	300	39.0692	0.230545	0.496714	0.189841	0.12	2400000000000000	8300000	0.715161	5.30485	13.9107
1043	600	300	72.4332	0.43598	0.404356	0.404874	0.12	2400000000000000	8300000	0.719945	32.2906	85.2407
1044	600	300	31.2682	0.344592	0.372915	0.375136	0.12	2400000000000000	8300000	0.805305	9.41443	27.7988
1045	600	300	10.0748	0.345636	0.498773	0.409075	0.12	2400000000000000	8300000	0.783319	4.43761	12.7456
1046	600	300	63.9692	0.125075	0.0279427	0.364611	0.12	2400000000000000	8300000	0.819605	0.509129	1.53004
1047	600	300	25.1852	0.266633	0.148462	0.263515	0.12	2400000000000000	8300000	0.650855	1.64084	3.91582
1048	600	300	7.52665	0.330512	0.478903	0.204317	0.12	2400000000000000	8300000	0.813721	1.5203	4.53602
1049	600	300	45.1547	0.308744	0.113431	0.346723	0.12	2400000000000000	8300000	0.682191	3.42453	8.566
1050	600	300	41.138	0.262003	0.0624749	0.219906	0.12	2400000000000000	8300000	0.73394	0.924865	2.48892
1051	600	300	66.722	0.361312	0.450438	0.446351	0.12	2400000000000000	8300000	0.862889	30.2726	95.7804
1052	600	300	34.8696	0.304823	0.343891	0.1243	0.12	2400000000000000	8300000	0.884173	2.83776	9.19993
1053	600	300	2.05384	0.110898	0.462274	0.378756	0.12	2400000000000000	8300000	0.733444	0.249078	0.669845
1054	600	300	37.5962	0.159107	0.419474	0.235616	0.12	2400000000000000	8300000	0.848875	3.69259	11.4933
1055	600	300	9.1584	0.274718	0.351951	0.401163	0.12	2400000000000000	8300000	0.732275	2.21869	5.95719
1056	600	300	52.8356	0.235882	0.467303	0.478954	0.12	2400000000000000	8300000	0.871135	17.4221	55.6491
1057	600	300	61.5289	0.448094	0.358261	0.209899	0.12	2400000000000000	8300000	0.846784	12.9493	40.2059
1058	600	300	46.4668	0.484497	0.441052	0.465753	0.12	2400000000000000	8300000	0.860816	28.8847	91.1694
1059	600	300	37.8689	0.369298	0.335832	0.216899	0.12	2400000000000000	8300000	0.640433	6.36248	14.9407
1060	600	300	72.3078	0.107044	0.193704	0.303631	0.12	2400000000000000	8300000	0.826819	2.84327	8.61986
1061	600	300	43.1293	0.204443	0.209172	0.457264	0.12	2400000000000000	8300000	0.689663	5.26745	13.3202
1062	600	300	22.0556	0.181644	0.119646	0.446736	0.12	2400000000000000	8300000	0.796328	1.33744	3.90516
1063	600	300	67.552	0.358494	0.171971	0.363352	0.12	2400000000000000	8300000	0.608921	9.45124	21.1019
1064	600	300	26.7602	0.234586	0.0407838	0.430177	0.12	2400000000000000	8300000	0.653233	0.687881	1.64761
1065	600	300	65.4385	0.125725	0.436982	0.483607	0.12	2400000000000000	8300000	0.820618	10.8592	32.6746
1066	600	300	24.6388	0.356003	0.00459659	0.310214	0.12	2400000000000000	8300000	0.750287	0.078119	0.21491
1067	600	300	27.9082	0.277623	0.0227455	0.388826	0.12	2400000000000000	8300000	0.699984	0.427981	1.09846
1068	600	300	5.69687	0.294333	0.377842	0.319825	0.12	2400000000000000	8300000	0.667647	1.26557	3.09816
1069	600	300	40.9265	0.283599	0.0534947	0.389363	0.12	2400000000000000	8300000	0.816336	1.50995	4.51963
1070	600	300	19.4286	0.206339	0.464909	0.13056	0.12	2400000000000000	8300000	0.828687	1.51981	4.61797
1071	600	300	13.1659	0.353008	0.370813	0.479533	0.12	2400000000000000	8300000	0.759659	5.16174	14.3776
1072	600	300	1.71803	0.27013	0.363874	0.396466	0.12	2400000000000000	8300000	0.852693	0.418164	1.30741
1073	600	300	74.579	0.229606	0.436947	0.340058	0.12	2400000000000000	8300000	0.603696	15.8916	35.1769
1074	600	300	49.2292	0.196111	0.0906625	0.346503	0.12	2400000000000000	8300000	0.695405	1.89429	4.83009
1075	600	300	14.7382	0.235718	0.417887	0.342397	0.12	2400000000000000	8300000	0.871305	3.10466	9.91872
1076	600	300	3.83839	0.153392	0.201923	0.151926	0.12	2400000000000000	8300000	0.691752	0.112812	0.286139
1077	600	300	17.126	0.158928	0.140831	0.17951	0.12	2400000000000000	8300000	0.774707	0.429765	1.22079
1078	600	300	31.5247	0.168647	0.286069	0.259492	0.12	2400000000000000	8300000	0.661723	2.46496	5.98077
1079	600	300	49.5313	0.238081	0.229019	0.172557	0.12	2400000000000000	8300000	0.662274	2.9107	7.06815
1080	600	300	29.8006	0.331505	0.0648369	0.224674	0.12	2400000000000000	8300000	0.831358	0.898827	2.73991
1081	600	300	65.397	0.171675	0.353919	0.415575	0.12	2400000000000000	8300000	0.769879	10.3134	29.1137
1082	600	300	16.9333	0.478057	0.298986	0.113069	0.12	2400000000000000	8300000	0.753244	1.70923	4.72073
1083	600	300	77.0497	0.124858	0.26764	0.414867	0.12	2400000000000000	8300000	0.646919	6.67166	15.8254
1084	600	300	76.5345	0.490854	0.324247	0.210834	0.12	2400000000000000	8300000	0.622003	16.0403	36.5829
1085	600	300	3.39669	0.151756	0.355665	0.221678	0.12	2400000000000000	8300000	0.736361	0.253835	0.685353
1086	600	300	16.2165	0.252625	0.479081	0.152472	0.12	2400000000000000	8300000	0.66827	1.86904	4.57976
1087	600	300	65.0599	0.188953	0.07052	0.115698	0.12	2400000000000000	8300000	0.719291	0.626457	1.65222
1088	600	300	49.7503	0.306988	0.227403	0.272527	0.12	2400000000000000	8300000	0.865518	5.91167	18.7611
1089	600	300	46.445	0.346728	0.326334	0.199903	0.12	2400000000000000	8300000	0.688234	6.56138	16.5578
1090	600	300	9.78632	0.315709	0.25825	0.397483	0.12	2400000000000000	8300000	0.657235	1.98085	4.77357
1091	600	300	7.15592	0.292957	0.0750453	0.220438	0.12	2400000000000000	8300000	0.783887	0.216603	0.622572
1092	600	300	60.1794	0.269882	0.389655	0.16518	0.12	2400000000000000	8300000	0.848769	6.52901	20.3193
1093	600	300	42.2054	0.21235	0.342527	0.49477	0.12	2400000000000000	8300000	0.889967	9.48651	30.9565
1094	600	300	26.8786	0.355439	0.420379	0.323585	0.12	2400000000000000	8300000	0.651952	8.11689	19.4034
1095	600	300	44.0646	0.166263	0.0122099	0.388138	0.12	2400000000000000	8300000	0.666126	0.216856	0.529663
1096	600	300	66.0142	0.14653	0.012158	0.209159	0.12	2400000000000000	8300000	0.863522	0.153634	0.486444
1097	600	300	49.585	0.111018	0.294887	0.291741	0.12	2400000000000000	8300000	0.843732	2.95791	9.15085
1098	600	300	46.5846	0.452441	0.0136737	0.166487	0.12	2400000000000000	8300000	0.836727	0.299681	0.91942
1099	600	300	3.23811	0.363035	0.318617	0.400307	0.12	2400000000000000	8300000	0.794284	0.936461	2.72733
1100	600	300	33.1354	0.237178	0.10068	0.497656	0.12	2400000000000000	8300000	0.711857	2.45937	6.4193
1101	600	300	24.1816	0.435119	0.427578	0.179466	0.12	2400000000000000	8300000	0.875352	5.04285	16.1857
1102	600	300	57.2513	0.103756	0.00958741	0.443401	0.12	2400000000000000	8300000	0.725448	0.15772	0.41953
1103	600	300	59.9347	0.234572	0.100013	0.154293	0.12	2400000000000000	8300000	0.882425	1.35501	4.38422
1104	600	300	28.1715	0.408509	0.0567626	0.217169	0.12	2400000000000000	8300000	0.678739	0.886053	2.20513
1105	600	300	63.4524	0.158565	0.32712	0.404045	0.12	2400000000000000	8300000	0.643934	8.30574	19.6106
1106	600	300	43.1578	0.46021	0.0262948	0.363857	0.12	2400000000000000	8300000	0.898332	1.18687	3.90941
1107	600	300	5.49077	0.382665	0.12486	0.318251	0.12	2400000000000000	8300000	0.784607	0.521474	1.50022
1108	600	300	68.1772	0.151986	0.403761	0.241868	0.12	2400000000000000	8300000	0.778687	6.32023	18.0454
1109	600	300	72.3598	0.249928	0.23965	0.166897	0.12	2400000000000000	8300000	0.680899	4.51777	11.2792
1110	600	300	30.0388	0.425656	0.493094	0.453676	0.12	2400000000000000	8300000	0.884438	17.8651	57.9353
1111	600	300	12.823	0.32226	0.382885	0.29252	0.12	2400000000000000	8300000	0.828141	2.89071	8.77769
1112	600	300	42.2766	0.407434	0.174	0.352379	0.12	2400000000000000	8300000	0.658631	6.59635	15.93
1113	600	300	28.1622	0.480858	0.407933	0.158275	0.12	2400000000000000	8300000	0.853409	5.46099	17.0883
1114	600	300	43.4575	0.374005	0.421948	0.461525	0.12	2400000000000000	8300000	0.789314	19.7689	57.2143
1115	600	300	76.9915	0.129865	0.493265	0.35484	0.12	2400000000000000	8300000	0.619471	10.9303	24.8271
1116	600	300	1.83759	0.457726	0.373915	0.399024	0.12	2400000000000000	8300000	0.853672	0.783813	2.45344
1117	600	300	60.3012	0.16355	0.24355	0.478134	0.12	2400000000000000	8300000	0.814157	7.17301	21.4132
1118	600	300	20.7039	0.2373	0.206604	0.148287	0.12	2400000000000000	8300000	0.763541	0.94011	2.63198
1119	600	300	14.8564	0.150301	0.397885	0.150281	0.12	2400000000000000	8300000	0.682835	0.833918	2.0879
1120	600	300	37.0706	0.409799	0.191155	0.158682	0.12	2400000000000000	8300000	0.885163	2.87807	9.34105
1121	600	300	25.6244	0.150216	0.176403	0.249348	0.12	2400000000000000	8300000	0.882838	1.05747	3.4231
1122	600	300	19.8274	0.297463	0.435791	0.36019	0.12	2400000000000000	8300000	0.860812	5.78223	18.2505
1123	600	300	26.3359	0.343681	0.293099	0.440067	0.12	2400000000000000	8300000	0.730798	7.29163	19.5386
1124	600	300	78.2766	0.3694	0.416412	0.182381	0.12	2400000000000000	8300000	0.75823	13.7157	38.1322
1125	600	300	78.7446	0.103511	0.194328	0.283651	0.12	2400000000000000	8300000	0.78052	2.80618	8.03102
1126	600	300	36.9379	0.204064	0.229671	0.18187	0.12	2400000000000000	8300000	0.82919	1.9665	5.97888
1127	600	300	24.488	0.486674	0.0171228	0.429198	0.12	2400000000000000	8300000	0.815217	0.547031	1.63515
1128	600	300	59.9279	0.285433	0.345991	0.161849	0.12	2400000000000000	8300000	0.851895	5.98267	18.6876
1129	600	300	29.7626	0.31607	0.0567476	0.189726	0.12	2400000000000000	8300000	0.75225	0.632582	1.74482
1130	600	300	60.4666	0.15067	0.21638	0.314226	0.12	2400000000000000	8300000	0.68758	3.86892	9.75404
1131	600	300	7.4744	0.217951	0.487733	0.147874	0.12	2400000000000000	8300000	0.80683	0.733829	2.17094
1132	600	300	54.6613	0.43791	0.457722	0.395725	0.12	2400000000000000	8300000	0.709359	27.0799	70.4343
1133	600	300	36.399	0.114412	0.480108	0.362281	0.12	2400000000000000	8300000	0.797187	4.5241	13.224
1134	600	300	76.8725	0.293748	0.261331	0.461512	0.12	2400000000000000	8300000	0.868795	17.0101	54.1872
1135	600	300	6.62399	0.265193	0.0642634	0.193181	0.12	2400000000000000	8300000	0.799531	0.136206	0.399304
1136	600	300	14.2228	0.231677	0.484467	0.446695	0.12	2400000000000000	8300000	0.734764	4.45378	11.9991
1137	600	300	59.6226	0.18648	0.443075	0.498721	0.12	2400000000000000	8300000	0.66433	15.345	37.3785
1138	600	300	59.1722	0.163599	0.246726	0.177552	0.12	2400000000000000	8300000	0.705506	2.64866	6.8517
1139	600	300	17.6773	0.340475	0.132528	0.380981	0.12	2400000000000000	8300000	0.871088	1.89801	6.06223
1140	600	300	46.1334	0.167999	0.369584	0.174317	0.12	2400000000000000	8300000	0.696071	3.11862	7.95953
1141	600	300	70.6563	0.390681	0.46365	0.430012	0.12	2400000000000000	8300000	0.663813	34.374	83.6658
1142	600	300	16.7578	0.184318	0.489818	0.252068	0.12	2400000000000000	8300000	0.850606	2.38189	7.42885
1143	600	300	17.39	0.397829	0.172848	0.400586	0.12	2400000000000000	8300000	0.693764	2.99186	7.6107
1144	600	300	8.70632	0.170133	0.395541	0.255953	0.12	2400000000000000	8300000	0.768067	0.936615	2.63774
1145	600	300	54.6431	0.326254	0.19135	0.495099	0.12	2400000000000000	8300000	0.66217	10.5487	25.6118
1146	600	300	71.8306	0.372319	0.49962	0.180149	0.12	2400000000000000	8300000	0.632484	15.0343	34.8661
1147	600	300	24.0709	0.366447	0.0442643	0.133302	0.12	2400000000000000	8300000	0.759665	0.325074	0.905472
1148	600	300	77.1756	0.223948	0.436435	0.342903	0.12	2400000000000000	8300000	0.807336	16.1549	47.8222
1149	600	300	30.9263	0.40973	0.468482	0.400346	0.12	2400000000000000	8300000	0.856021	14.8437	46.5905
1150	600	300	76.4328	0.114452	0.259945	0.369525	0.12	2400000000000000	8300000	0.697072	5.24826	13.4142
1151	600	300	6.81877	0.111666	0.325398	0.44128	0.12	2400000000000000	8300000	0.829931	0.682878	2.07805
1152	600	300	19.517	0.499036	0.00361092	0.147844	0.12	2400000000000000	8300000	0.892681	0.0324754	0.106297
1153	600	300	33.8648	0.295677	0.380511	0.188892	0.12	2400000000000000	8300000	0.80118	4.49505	13.2049
1154	600	300	13.64	0.226313	0.346099	0.274757	0.12	2400000000000000	8300000	0.828206	1.83341	5.56761
1155	600	300	37.5767	0.246621	0.428938	0.391325	0.12	2400000000000000	8300000	0.654573	9.71557	23.3183
1156	600	300	35.213	0.458103	0.221762	0.281734	0.12	2400000000000000	8300000	0.712485	6.29478	16.4448
1157	600	300	22.4053	0.488813	0.307204	0.38155	0.12	2400000000000000	8300000	0.858986	8.01787	25.2532
1158	600	300	30.1511	0.179911	0.00605789	0.113134	0.12	2400000000000000	8300000	0.773197	0.02322	0.0658301
1159	600	300	53.6861	0.20321	0.212173	0.239434	0.12	2400000000000000	8300000	0.876188	3.46153	11.1208
1160	600	300	50.0871	0.137407	0.413274	0.31629	0.12	2400000000000000	8300000	0.761226	5.61881	15.683
1161	600	300	38.3097	0.110057	0.279552	0.243435	0.12	2400000000000000	8300000	0.890671	1.79208	5.85257
1162	600	300	53.1645	0.432368	0.253268	0.403029	0.12	2400000000000000	8300000	0.882051	14.6548	47.3962
1163	600	300	16.1637	0.136271	0.395634	0.365857	0.12	2400000000000000	8300000	0.742598	1.99129	5.422
1164	600	300	25.9499	0.489775	0.434539	0.286669	0.12	2400000000000000	8300000	0.614389	9.88845	22.2763
1165	600	300	19.9586	0.186709	0.465564	0.187748	0.12	2400000000000000	8300000	0.632272	2.03441	4.71643
1166	600	300	24.6253	0.210295	0.13091	0.394725	0.12	2400000000000000	8300000	0.774535	1.67135	4.74656
1167	600	300	16.0648	0.284274	0.080706	0.35603	0.12	2400000000000000	8300000	0.743941	0.819581	2.23564
1168	600	300	60.8054	0.439285	0.470565	0.375092	0.12	2400000000000000	8300000	0.85347	29.4465	92.1497
1169	600	300	15.416	0.361294	0.396532	0.216156	0.12	2400000000000000	8300000	0.806786	2.98171	8.82053
1170	600	300	52.2006	0.164946	0.0721919	0.202774	0.12	2400000000000000	8300000	0.66666	0.787236	1.92433
1171	600	300	44.4327	0.241495	0.330857	0.362506	0.12	2400000000000000	8300000	0.623156	8.0381	18.3663
1172	600	300	12.8889	0.34445	0.0230661	0.208326	0.12	2400000000000000	8300000	0.672067	0.133244	0.328345
1173	600	300	3.60941	0.130332	0.19806	0.184798	0.12	2400000000000000	8300000	0.834117	0.107539	0.328901
1174	600	300	28.604	0.173938	0.448309	0.312322	0.12	2400000000000000	8300000	0.815659	4.35099	13.0127
1175	600	300	47.4843	0.448456	0.232504	0.182662	0.12	2400000000000000	8300000	0.892432	5.64854	18.4834
1176	600	300	47.5682	0.432208	0.448123	0.450642	0.12	2400000000000000	8300000	0.627292	25.9314	59.6441
1177	600	300	64.0605	0.208172	0.372711	0.231589	0.12	2400000000000000	8300000	0.833166	7.18933	21.963
1178	600	300	53.2909	0.39532	0.250584	0.172328	0.12	2400000000000000	8300000	0.667706	5.68197	13.9109
1179	600	300	64.2286	0.186412	0.320328	0.169483	0.12	2400000000000000	8300000	0.778504	4.05985	11.5889
1180	600	300	36.6949	0.317142	0.140205	0.206631	0.12	2400000000000000	8300000	0.85954	2.10574	6.63655
1181	600	300	63.4658	0.376495	0.21802	0.40693	0.12	2400000000000000	8300000	0.819447	13.2404	39.7828
1182	600	300	10.8263	0.483211	0.0561551	0.138278	0.12	2400000000000000	8300000	0.861202	0.253715	0.801167
1183	600	300	49.6213	0.358041	0.169712	0.285337	0.12	2400000000000000	8300000	0.827239	5.37352	16.299
1184	600	300	73.2695	0.23598	0.0264768	0.411089	0.12	2400000000000000	8300000	0.617768	1.1754	2.66247
1185	600	300	18.1445	0.148192	0.110738	0.457123	0.12	2400000000000000	8300000	0.805194	0.850128	2.5099
1186	600	300	67.8247	0.247156	0.1726	0.267019	0.12	2400000000000000	8300000	0.681006	4.82534	12.049
1187	600	300	46.4785	0.200653	0.472023	0.229399	0.12	2400000000000000	8300000	0.669455	6.30726	15.4822
1188	600	300	54.6548	0.172432	0.21623	0.430719	0.12	2400000000000000	8300000	0.681619	5.48204	13.7011
1189	600	300	7.57084	0.164644	0.311995	0.368302	0.12	2400000000000000	8300000	0.678	0.894599	2.22397
1190	600	300	13.0369	0.26141	0.0905725	0.138738	0.12	2400000000000000	8300000	0.665598	0.26747	0.652768
1191	600	300	10.5109	0.404132	0.093651	0.183589	0.12	2400000000000000	8300000	0.672084	0.456153	1.1241
1192	600	300	24.7189	0.158019	0.477151	0.217136	0.12	2400000000000000	8300000	0.746428	2.52762	6.91787
1193	600	300	53.6093	0.416731	0.184682	0.454663	0.12	2400000000000000	8300000	0.744177	11.7165	31.9702
1194	600	300	53.0167	0.100078	0.0639811	0.246552	0.12	2400000000000000	8300000	0.798332	0.522756	1.53022
1195	600	300	28.3059	0.243838	0.0520852	0.277735	0.12	2400000000000000	8300000	0.665675	0.623606	1.5221
1196	600	300	65.1407	0.359605	0.458554	0.187117	0.12	2400000000000000	8300000	0.679689	12.5536	31.286
1197	600	300	61.8415	0.419004	0.134567	0.311639	0.12	2400000000000000	8300000	0.737764	6.78696	18.3596
1198	600	300	42.0744	0.298352	0.134132	0.42667	0.12	2400000000000000	8300000	0.683439	4.48702	11.2442
1199	600	300	73.3447	0.378122	0.351373	0.271565	0.12	2400000000000000	8300000	0.731153	16.5283	44.3108
1200	600	300	15.0827	0.278327	0.271966	0.401012	0.12	2400000000000000	8300000	0.741146	2.85953	7.77086
1201	600	300	77.3917	0.350917	0.200396	0.266237	0.12	2400000000000000	8300000	0.677376	9.04986	22.4773
1202	600	300	11.2114	0.473597	0.0634618	0.382643	0.12	2400000000000000	8300000	0.724953	0.805306	2.14063
1203	600	300	57.2647	0.305376	0.423052	0.370413	0.12	2400000000000000	8300000	0.823461	17.1155	51.6777
1204	600	300	47.8112	0.220679	0.110504	0.269187	0.12	2400000000000000	8300000	0.768323	1.96025	5.5224
1205	600	300	9.91184	0.414755	0.00757666	0.183514	0.12	2400000000000000	8300000	0.615448	0.0357009	0.0805641
1206	600	300	33.0422	0.474497	0.340314	0.471417	0.12	2400000000000000	8300000	0.867289	15.7099	49.9585
1207	600	300	77.8542	0.143162	0.412361	0.178225	0.12	2400000000000000	8300000	0.891615	5.11614	16.726
1208	600	300	45.7037	0.478448	0.240994	0.307606	0.12	2400000000000000	8300000	0.630091	10.1245	23.391
1209	600	300	25.5983	0.134347	0.157816	0.247332	0.12	2400000000000000	8300000	0.75651	0.838415	2.32565
1210	600	300	54.1756	0.404119	0.281618	0.497298	0.12	2400000000000000	8300000	0.892056	19.1504	62.6384
1211	600	300	9.9181	0.182435	0.29278	0.196569	0.12	2400000000000000	8300000	0.619519	0.650398	1.47743
1212	600	300	74.7052	0.430134	0.299924	0.48156	0.12	2400000000000000	8300000	0.850549	28.9869	90.401
1213	600	300	74.3344	0.322503	0.15284	0.353254	0.12	2400000000000000	8300000	0.651135	8.08418	19.3009
1214	600	300	11.4743	0.302414	0.190891	0.454161	0.12	2400000000000000	8300000	0.633455	1.87894	4.36414
1215	600	300	8.759	0.260572	0.283138	0.289324	0.12	2400000000000000	8300000	0.876568	1.16775	3.75326
1216	600	300	59.7361	0.462274	0.0871764	0.107756	0.12	2400000000000000	8300000	0.615763	1.62019	3.65806
1217	600	300	62.5157	0.383164	0.417884	0.37836	0.12	2400000000000000	8300000	0.852639	23.655	73.9536
1218	600	300	51.5073	0.28063	0.0839868	0.411648	0.12	2400000000000000	8300000	0.777053	3.12123	8.893
1219	600	300	48.1347	0.489148	0.0960387	0.280467	0.12	2400000000000000	8300000	0.621841	3.96108	9.03159
1220	600	300	35.8725	0.422374	0.324111	0.469494	0.12	2400000000000000	8300000	0.883165	14.4002	46.6319
1221	600	300	8.98627	0.113614	0.0793828	0.410696	0.12	2400000000000000	8300000	0.880633	0.207895	0.67129
1222	600	300	44.5008	0.286761	0.243795	0.459175	0.12	2400000000000000	8300000	0.828796	8.92232	27.1142
1223	600	300	66.6853	0.488125	0.324695	0.458625	0.12	2400000000000000	8300000	0.895636	30.2748	99.4225
1224	600	300	39.0564	0.312043	0.15513	0.216886	0.12	2400000000000000	8300000	0.79958	2.56107	7.50852
1225	600	300	11.9554	0.152278	0.116953	0.282129	0.12	2400000000000000	8300000	0.83576	0.375188	1.14975
1226	600	300	72.9271	0.479675	0.313995	0.156484	0.12	2400000000000000	8300000	0.899154	10.7353	35.3933
1227	600	300	65.3043	0.206463	0.487127	0.353898	0.12	2400000000000000	8300000	0.603615	14.5175	32.1309
1228	600	300	5.64779	0.404278	0.454198	0.328627	0.12	2400000000000000	8300000	0.892416	2.1286	6.9652
1229	600	300	11.2014	0.300389	0.497534	0.265755	0.12	2400000000000000	8300000	0.685058	2.77874	6.97986
1230	600	300	44.5431	0.235619	0.240077	0.457472	0.12	2400000000000000	8300000	0.740498	7.19935	19.5474
1231	600	300	77.3251	0.174652	0.463845	0.409979	0.12	2400000000000000	8300000	0.72172	16.0404	42.4478
1232	600	300	78.8047	0.193009	0.328557	0.1161	0.12	2400000000000000	8300000	0.61101	3.62377	8.11859
1233	600	300	56.1005	0.100579	0.454557	0.317269	0.12	2400000000000000	8300000	0.607825	5.08251	11.3273
1234	600	300	44.656	0.126487	0.231525	0.221771	0.12	2400000000000000	8300000	0.604449	1.8114	4.01463
1235	600	300	22.197	0.358489	0.146372	0.497595	0.12	2400000000000000	8300000	0.808523	3.61985	10.7313
1236	600	300	57.8396	0.210994	0.499798	0.271735	0.12	2400000000000000	8300000	0.757417	10.352	28.7495
1237	600	300	53.1876	0.400765	0.219194	0.301012	0.12	2400000000000000	8300000	0.828312	8.78415	26.6787
1238	600	300	30.2126	0.10733	0.382912	0.347543	0.12	2400000000000000	8300000	0.826272	2.69528	8.16579
1239	600	300	54.1532	0.119355	0.431782	0.495583	0.12	2400000000000000	8300000	0.820898	8.63839	26.0012
1240	600	300	79.1407	0.216932	0.319709	0.469051	0.12	2400000000000000	8300000	0.752983	16.08	44.3958
1241	600	300	60.7583	0.142057	0.0325366	0.442806	0.12	2400000000000000	8300000	0.845572	0.776675	2.40802
1242	600	300	18.4709	0.356058	0.388158	0.313816	0.12	2400000000000000	8300000	0.63615	5.00357	11.6711
1243	600	300	63.2901	0.322249	0.458631	0.1387	0.12	2400000000000000	8300000	0.714666	8.10315	21.2338
1244	600	300	14.2795	0.129877	0.328608	0.184895	0.12	2400000000000000	8300000	0.830227	0.70378	2.14242
1245	600	300	3.15368	0.175006	0.483305	0.324993	0.12	2400000000000000	8300000	0.877964	0.541443	1.74301
1246	600	300	76.9649	0.138639	0.0134734	0.456831	0.12	2400000000000000	8300000	0.678484	0.4102	1.02049
1247	600	300	8.86523	0.332452	0.00982554	0.37704	0.12	2400000000000000	8300000	0.796655	0.0681945	0.199201
1248	600	300	43.8438	0.284223	0.110367	0.482832	0.12	2400000000000000	8300000	0.835127	4.14755	12.7003
1249	600	300	9.4432	0.146285	0.0210541	0.312814	0.12	2400000000000000	8300000	0.89715	0.0568233	0.186923
1250	600	300	18.6017	0.282223	0.00806956	0.12418	0.12	2400000000000000	8300000	0.631703	0.0328575	0.0761061
1251	600	300	64.6991	0.164682	0.311702	0.475168	0.12	2400000000000000	8300000	0.879807	9.85636	31.7962
1252	600	300	4.43772	0.402662	0.214957	0.296824	0.12	2400000000000000	8300000	0.895327	0.712095	2.33771
1253	600	300	40.4016	0.253091	0.0955568	0.372584	0.12	2400000000000000	8300000	0.711961	2.27378	5.93576
1254	600	300	39.6923	0.239222	0.41772	0.162234	0.12	2400000000000000	8300000	0.883144	4.01903	13.0144
1255	600	300	46.1789	0.255306	0.203829	0.444505	0.12	2400000000000000	8300000	0.614076	6.67167	15.022
1256	600	300	19.6623	0.240515	0.04572	0.380881	0.12	2400000000000000	8300000	0.764958	0.51435	1.44267
1257	600	300	50.9965	0.309948	0.0966249	0.4005	0.12	2400000000000000	8300000	0.776734	3.8204	10.8806
1258	600	300	14.3544	0.338949	0.118418	0.387899	0.12	2400000000000000	8300000	0.691405	1.39586	3.53873
1259	600	300	8.16713	0.108667	0.0895844	0.331665	0.12	2400000000000000	8300000	0.68997	0.164697	0.416665
1260	600	300	8.38447	0.299321	0.293716	0.126593	0.12	2400000000000000	8300000	0.840822	0.582824	1.79685
1261	600	300	46.0358	0.469523	0.0152366	0.24474	0.12	2400000000000000	8300000	0.712294	0.503423	1.31481
1262	600	300	31.5928	0.155777	0.369293	0.474899	0.12	2400000000000000	8300000	0.709433	5.39079	14.0228
1263	600	300	61.7676	0.265296	0.142035	0.385081	0.12	2400000000000000	8300000	0.62362	5.59793	12.8003
1264	600	300	17.8254	0.160274	0.478754	0.176987	0.12	2400000000000000	8300000	0.856856	1.51197	4.75031
1265	600	300	57.8543	0.250975	0.129746	0.401851	0.12	2400000000000000	8300000	0.620406	4.72837	10.7562
1266	600	300	29.7589	0.363253	0.0320988	0.318693	0.12	2400000000000000	8300000	0.669138	0.690676	1.69458
1267	600	300	42.1523	0.18457	0.0949212	0.29305	0.12	2400000000000000	8300000	0.600296	1.35168	2.97516
1268	600	300	66.3348	0.254728	0.278369	0.371827	0.12	2400000000000000	8300000	0.716645	10.9236	28.704
1269	600	300	63.8421	0.374263	0.269383	0.477024	0.12	2400000000000000	8300000	0.683988	19.177	48.095
1270	600	300	6.47004	0.182305	0.442589	0.487065	0.12	2400000000000000	8300000	0.786301	1.58811	4.57867
1271	600	300	47.3485	0.405325	0.183319	0.326928	0.12	2400000000000000	8300000	0.891384	7.18386	23.4798
1272	600	300	62.45	0.129512	0.0200988	0.137285	0.12	2400000000000000	8300000	0.603207	0.139386	0.308289
1273	600	300	14.9803	0.338874	0.334896	0.160957	0.12	2400000000000000	8300000	0.721233	1.7091	4.51974
1274	600	300	53.5435	0.252472	0.312381	0.250961	0.12	2400000000000000	8300000	0.721137	6.61908	17.502
1275	600	300	20.9968	0.131127	0.260747	0.10222	0.12	2400000000000000	8300000	0.883478	0.458339	1.48475
1276	600	300	54.0088	0.111625	0.237935	0.119169	0.12	2400000000000000	8300000	0.700448	1.06766	2.74208
1277	600	300	5.55221	0.174351	0.469155	0.410283	0.12	2400000000000000	8300000	0.611351	1.1638	2.6088
1278	600	300	38.3888	0.267084	0.124362	0.200003	0.12	2400000000000000	8300000	0.601471	1.59281	3.51277
1279	600	300	50.0046	0.431484	0.0245261	0.244839	0.12	2400000000000000	8300000	0.815939	0.809229	2.42103
1280	600	300	7.23711	0.28386	0.00668873	0.385536	0.12	2400000000000000	8300000	0.731009	0.0330876	0.0886867
1281	600	300	15.6573	0.292907	0.399009	0.391407	0.12	2400000000000000	8300000	0.643691	4.47347	10.5583
1282	600	300	15.9224	0.243268	0.406058	0.264717	0.12	2400000000000000	8300000	0.744423	2.60046	7.09809
1283	600	300	1.24712	0.192983	0.184153	0.300672	0.12	2400000000000000	8300000	0.739815	0.0832312	0.225777
1284	600	300	37.5735	0.178968	0.265244	0.121598	0.12	2400000000000000	8300000	0.874076	1.35461	4.34146
1285	600	300	52.6285	0.315916	0.438031	0.354401	0.12	2400000000000000	8300000	0.662982	16.1205	39.1879
1286	600	300	15.9927	0.350807	0.0687214	0.314	0.12	2400000000000000	8300000	0.895772	0.756133	2.48352
1287	600	300	44.8915	0.306245	0.189268	0.164153	0.12	2400000000000000	8300000	0.770594	2.66776	7.53779
1288	600	300	2.60365	0.242157	0.0131207	0.493497	0.12	2400000000000000	8300000	0.75423	0.0254981	0.0705152
1289	600	300	62.5756	0.139581	0.00576411	0.251054	0.12	2400000000000000	8300000	0.632039	0.078944	0.182951
1290	600	300	55.655	0.238606	0.39532	0.488681	0.12	2400000000000000	8300000	0.731364	16.0231	42.9687
1291	600	300	49.8961	0.21313	0.204176	0.328776	0.12	2400000000000000	8300000	0.60144	4.45864	9.83254
1292	600	300	23.4657	0.150164	0.475673	0.237842	0.12	2400000000000000	8300000	0.874987	2.48991	7.98834
1293	600	300	56.0866	0.380393	0.0239388	0.24639	0.12	2400000000000000	8300000	0.763557	0.785966	2.20047
1294	600	300	21.0559	0.175943	0.274555	0.439348	0.12	2400000000000000	8300000	0.757104	2.79108	7.74817
1295	600	300	63.3731	0.483822	0.218177	0.276301	0.12	2400000000000000	8300000	0.784946	11.5443	33.2261
1296	600	300	66.4951	0.251569	0.463428	0.374149	0.12	2400000000000000	8300000	0.623327	18.1159	41.4044
1297	600	300	68.6079	0.326243	0.282319	0.383232	0.12	2400000000000000	8300000	0.777734	15.1253	43.1327
1298	600	300	48.522	0.439203	0.498941	0.265769	0.12	2400000000000000	8300000	0.606814	17.65	39.2709
1299	600	300	7.59565	0.336587	0.122587	0.150626	0.12	2400000000000000	8300000	0.603241	0.294843	0.652159
1300	600	300	65.9509	0.321875	0.255461	0.139714	0.12	2400000000000000	8300000	0.618479	4.73213	10.7313
1301	600	300	1.72869	0.102568	0.125673	0.272064	0.12	2400000000000000	8300000	0.665255	0.0378643	0.0923613
1302	600	300	14.0203	0.203217	0.367168	0.117732	0.12	2400000000000000	8300000	0.642479	0.769242	1.81215
1303	600	300	37.0916	0.115881	0.15738	0.273224	0.12	2400000000000000	8300000	0.64324	1.15436	2.72261
1304	600	300	30.7889	0.279063	0.250878	0.431568	0.12	2400000000000000	8300000	0.823333	5.81024	17.5404
1305	600	300	71.8275	0.250823	0.345606	0.103566	0.12	2400000000000000	8300000	0.604314	4.02756	8.92434
1306	600	300	67.4236	0.422729	0.0186056	0.129176	0.12	2400000000000000	8300000	0.690852	0.427846	1.08379
1307	600	300	55.3418	0.306443	0.136058	0.209897	0.12	2400000000000000	8300000	0.791519	3.02495	8.77912
1308	600	300	12.3801	0.470951	0.281879	0.102657	0.12	2400000000000000	8300000	0.742145	1.05375	2.86746
1309	600	300	32.741	0.45259	0.0693825	0.285539	0.12	2400000000000000	8300000	0.741167	1.83358	4.98295
1310	600	300	12.0921	0.4058	0.0747573	0.338693	0.12	2400000000000000	8300000	0.707743	0.775998	2.01376
1311	600	300	49.3559	0.486831	0.204796	0.136349	0.12	2400000000000000	8300000	0.827975	4.1906	12.7223
1312	600	300	73.8964	0.220594	0.0302112	0.274163	0.12	2400000000000000	8300000	0.713424	0.843296	2.20597
1313	600	300	6.99714	0.328935	0.0726991	0.14756	0.12	2400000000000000	8300000	0.628287	0.154211	0.355259
1314	600	300	38.6573	0.11434	0.0536633	0.453924	0.12	2400000000000000	8300000	0.633818	0.672476	1.56283
1315	600	300	10.6266	0.11629	0.388724	0.351248	0.12	2400000000000000	8300000	0.710713	1.05385	2.74627
1316	600	300	60.4205	0.152865	0.0827864	0.4936	0.12	2400000000000000	8300000	0.697269	2.35729	6.02677
1317	600	300	39.4955	0.387764	0.231324	0.442577	0.12	2400000000000000	8300000	0.684743	9.79289	24.5872
1318	600	300	51.3804	0.258031	0.368096	0.474159	0.12	2400000000000000	8300000	0.711204	14.4524	37.6883
1319	600	300	60.693	0.417617	0.299106	0.172799	0.12	2400000000000000	8300000	0.880054	8.18222	26.4029
1320	600	300	49.478	0.427227	0.0249484	0.325203	0.12	2400000000000000	8300000	0.658707	1.07116	2.58714
1321	600	300	20.8479	0.126836	0.339597	0.428583	0.12	2400000000000000	8300000	0.688513	2.40376	6.06842
1322	600	300	55.9359	0.28705	0.487164	0.290469	0.12	2400000000000000	8300000	0.728515	14.1909	37.907
1323	600	300	54.5558	0.192076	0.48119	0.2986	0.12	2400000000000000	8300000	0.712255	9.40387	24.5592
1324	600	300	64.528	0.16904	0.241421	0.475973	0.12	2400000000000000	8300000	0.800434	7.82856	22.9762
1325	600	300	55.6931	0.258422	0.0237401	0.408083	0.12	2400000000000000	8300000	0.680921	0.87086	2.17428
1326	600	300	5.66204	0.427549	0.0277327	0.282846	0.12	2400000000000000	8300000	0.808014	0.118601	0.35138
1327	600	300	54.5785	0.384707	0.326586	0.222884	0.12	2400000000000000	8300000	0.722601	9.54587	25.2921
1328	600	300	6.89239	0.244452	0.179536	0.176415	0.12	2400000000000000	8300000	0.847772	0.3333	1.03606
1329	600	300	29.7423	0.144836	0.179812	0.375321	0.12	2400000000000000	8300000	0.869283	1.81576	5.7875
1330	600	300	59.527	0.177667	0.240715	0.419202	0.12	2400000000000000	8300000	0.809495	6.66552	19.7842
1331	600	300	23.7773	0.254746	0.489967	0.312658	0.12	2400000000000000	8300000	0.840096	5.79555	17.8523
1332	600	300	58.1033	0.148001	0.398925	0.329656	0.12	2400000000000000	8300000	0.832391	7.06323	21.5577
1333	600	300	66.0105	0.307237	0.0606268	0.29915	0.12	2400000000000000	8300000	0.884962	2.29735	7.45456
1334	600	300	33.7208	0.391671	0.338174	0.304849	0.12	2400000000000000	8300000	0.814601	8.50418	25.4009
1335	600	300	2.60818	0.427502	0.274985	0.226887	0.12	2400000000000000	8300000	0.624027	0.434492	0.99416
1336	600	300	38.0853	0.129228	0.196148	0.36274	0.12	2400000000000000	8300000	0.680774	2.18715	5.4595
1337	600	300	73.2674	0.234704	0.389368	0.462162	0.12	2400000000000000	8300000	0.886456	19.3274	62.8206
1338	600	300	24.3895	0.32906	0.226698	0.279439	0.12	2400000000000000	8300000	0.703219	3.17541	8.18769
1339	600	300	79.0581	0.336586	0.292416	0.382097	0.12	2400000000000000	8300000	0.861226	18.5697	58.6398
1340	600	300	73.8174	0.174522	0.0857918	0.120759	0.12	2400000000000000	8300000	0.61738	0.833608	1.88706
1341	600	300	13.7057	0.419814	0.0137986	0.420501	0.12	2400000000000000	8300000	0.830034	0.208519	0.634619
1342	600	300	68.1414	0.364447	0.144719	0.112115	0.12	2400000000000000	8300000	0.816366	2.51665	7.53319
1343	600	300	64.8956	0.237011	0.0720386	0.426092	0.12	2400000000000000	8300000	0.885319	2.94876	9.57217
1344	600	300	46.2443	0.250714	0.401622	0.467506	0.12	2400000000000000	8300000	0.806093	13.5966	40.1871
1345	600	300	23.5713	0.142721	0.237206	0.306213	0.12	2400000000000000	8300000	0.794894	1.52618	4.44823
1346	600	300	18.884	0.163133	0.368661	0.192411	0.12	2400000000000000	8300000	0.820861	1.36483	4.10789
1347	600	300	39.7202	0.355449	0.445706	0.352725	0.12	2400000000000000	8300000	0.764825	13.8631	38.8772
1348	600	300	68.6077	0.210403	0.485795	0.124257	0.12	2400000000000000	8300000	0.821838	5.44234	16.4
1349	600	300	43.9471	0.426275	0.497343	0.10387	0.12	2400000000000000	8300000	0.734484	6.04438	16.2782
1350	600	300	3.20068	0.393868	0.332135	0.198742	0.12	2400000000000000	8300000	0.603441	0.51974	1.14998
1351	600	300	67.7216	0.241463	0.174214	0.477792	0.12	2400000000000000	8300000	0.870661	8.50131	27.1398
1352	600	300	60.2622	0.343111	0.123214	0.312152	0.12	2400000000000000	8300000	0.813446	4.967	14.8147
1353	600	300	13.5299	0.333563	0.254157	0.348003	0.12	2400000000000000	8300000	0.812607	2.49314	7.42845
1354	600	300	72.3478	0.368819	0.0214619	0.306568	0.12	2400000000000000	8300000	0.844313	1.09653	3.39466
1355	600	300	59.2476	0.220906	0.0888875	0.211087	0.12	2400000000000000	8300000	0.785667	1.53379	4.41852
1356	600	300	59.4781	0.478981	0.467723	0.339868	0.12	2400000000000000	8300000	0.660533	28.2853	68.5057
1357	600	300	54.9582	0.373957	0.390712	0.212259	0.12	2400000000000000	8300000	0.68325	10.6454	26.6695
1358	600	300	38.5546	0.452044	0.388632	0.236164	0.12	2400000000000000	8300000	0.720997	9.99072	26.412
1359	600	300	78.6761	0.485561	0.402731	0.293986	0.12	2400000000000000	8300000	0.824327	28.2498	85.3857
1360	600	300	3.56814	0.434999	0.416314	0.388084	0.12	2400000000000000	8300000	0.730464	1.56626	4.19502
1361	600	300	25.6842	0.384214	0.38547	0.434762	0.12	2400000000000000	8300000	0.716933	10.3292	27.153
1362	600	300	28.2592	0.140538	0.208093	0.105204	0.12	2400000000000000	8300000	0.870427	0.54304	1.73315
1363	600	300	5.07343	0.13233	0.0927954	0.333444	0.12	2400000000000000	8300000	0.632437	0.129747	0.300874
1364	600	300	26.8659	0.36796	0.216918	0.33603	0.12	2400000000000000	8300000	0.673388	4.5005	11.1121
1365	600	300	49.387	0.332063	0.022393	0.234866	0.12	2400000000000000	8300000	0.709198	0.538706	1.40085
1366	600	300	60.9049	0.17053	0.112876	0.256553	0.12	2400000000000000	8300000	0.630096	1.87853	4.34006
1367	600	300	45.2568	0.289783	0.24066	0.481974	0.12	2400000000000000	8300000	0.637268	9.50102	22.2006
1368	600	300	52.4272	0.199249	0.482064	0.387735	0.12	2400000000000000	8300000	0.781853	12.1949	34.9604
1369	600	300	41.8219	0.25365	0.0308021	0.23156	0.12	2400000000000000	8300000	0.868399	0.472574	1.50474
1370	600	300	70.4053	0.348146	0.154327	0.274727	0.12	2400000000000000	8300000	0.616507	6.49077	14.6726
1371	600	300	25.6142	0.229604	0.357325	0.449375	0.12	2400000000000000	8300000	0.601175	5.89818	13.0014
1372	600	300	67.3118	0.318492	0.221407	0.273639	0.12	2400000000000000	8300000	0.790634	8.11232	23.5176
1373	600	300	55.7631	0.254467	0.390456	0.423359	0.12	2400000000000000	8300000	0.877292	14.6503	47.1262
1374	600	300	36.3066	0.188131	0.383034	0.344792	0.12	2400000000000000	8300000	0.878741	5.63414	18.1535
1375	600	300	62.9059	0.121652	0.084598	0.371181	0.12	2400000000000000	8300000	0.704688	1.50087	3.87802
1376	600	300	29.6386	0.289698	0.239347	0.369631	0.12	2400000000000000	8300000	0.885168	4.74447	15.3987
1377	600	300	41.2152	0.489521	0.275857	0.406007	0.12	2400000000000000	8300000	0.611791	14.1134	31.6597
1378	600	300	60.9484	0.458062	0.45613	0.252969	0.12	2400000000000000	8300000	0.681404	20.12	50.2696
1379	600	300	68.5672	0.496591	0.387809	0.150828	0.12	2400000000000000	8300000	0.735709	12.4395	33.5567
1380	600	300	19.677	0.229914	0.0198218	0.465209	0.12	2400000000000000	8300000	0.785866	0.260557	0.750798
1381	600	300	20.9922	0.334143	0.165858	0.284843	0.12	2400000000000000	8300000	0.654807	2.06976	4.96941
1382	600	300	31.847	0.261026	0.227499	0.498145	0.12	2400000000000000	8300000	0.617915	5.88404	13.3314
1383	600	300	24.867	0.219516	0.126579	0.44826	0.12	2400000000000000	8300000	0.603454	1.9345	4.2804
1384	600	300	7.43081	0.261377	0.30266	0.133747	0.12	2400000000000000	8300000	0.738615	0.491054	1.3299
1385	600	300	68.7587	0.398728	0.438568	0.363334	0.12	2400000000000000	8300000	0.792958	27.2856	79.3333
1386	600	300	43.6338	0.397451	0.365698	0.169171	0.12	2400000000000000	8300000	0.721024	6.70103	17.7159
1387	600	300	55.5747	0.476731	0.169276	0.37516	0.12	2400000000000000	8300000	0.891609	10.5087	34.3555
1388	600	300	65.6185	0.360574	0.201993	0.348577	0.12	2400000000000000	8300000	0.804863	10.405	30.7069
1389	600	300	29.8278	0.316065	0.442228	0.380522	0.12	2400000000000000	8300000	0.655142	9.90856	23.8022
1390	600	300	32.1526	0.451337	0.400444	0.279573	0.12	2400000000000000	8300000	0.703485	10.1471	26.1738
1391	600	300	16.323	0.154905	0.475481	0.178326	0.12	2400000000000000	8300000	0.817098	1.33906	4.01186
1392	600	300	12.9988	0.128708	0.430617	0.433787	0.12	2400000000000000	8300000	0.769851	1.95191	5.50984
1393	600	300	77.0675	0.197766	0.0582785	0.193659	0.12	2400000000000000	8300000	0.720942	1.07438	2.84007
1394	600	300	22.3243	0.381395	0.0644498	0.134087	0.12	2400000000000000	8300000	0.629845	0.459566	1.06134
1395	600	300	70.8157	0.202017	0.0417307	0.323997	0.12	2400000000000000	8300000	0.650823	1.2081	2.88294
1396	600	300	57.3817	0.197197	0.0104307	0.276822	0.12	2400000000000000	8300000	0.880741	0.204068	0.659016
1397	600	300	57.1783	0.44101	0.434324	0.42321	0.12	2400000000000000	8300000	0.684897	28.9492	72.6997
1398	600	300	68.9151	0.359116	0.32548	0.441129	0.12	2400000000000000	8300000	0.642431	22.1935	52.2785
1399	600	300	18.7075	0.245472	0.166881	0.362607	0.12	2400000000000000	8300000	0.854655	1.7356	5.43891
1400	600	300	29.6942	0.283227	0.324271	0.15197	0.12	2400000000000000	8300000	0.726068	2.58858	6.89144
1401	600	300	74.5644	0.147755	0.00284553	0.284323	0.12	2400000000000000	8300000	0.768576	0.0556719	0.15689
1402	600	300	67.187	0.296398	0.275962	0.435309	0.12	2400000000000000	8300000	0.684866	14.9415	37.5207
1403	600	300	38.4035	0.480042	0.0522382	0.251058	0.12	2400000000000000	8300000	0.728322	1.51008	4.03268
1404	600	300	41.4993	0.43802	0.0100338	0.185165	0.12	2400000000000000	8300000	0.64367	0.210933	0.497827
1405	600	300	1.25145	0.497337	0.0722391	0.216477	0.12	2400000000000000	8300000	0.695067	0.0607905	0.15493
1406	600	300	20.8	0.147093	0.225546	0.225105	0.12	2400000000000000	8300000	0.62728	0.970207	2.2315
1407	600	300	72.8361	0.466129	0.380472	0.198244	0.12	2400000000000000	8300000	0.795805	15.9942	46.6703
1408	600	300	28.8546	0.137885	0.436798	0.464181	0.12	2400000000000000	8300000	0.658857	5.03834	12.1717
1409	600	300	34.2222	0.287722	0.37454	0.358854	0.12	2400000000000000	8300000	0.850516	8.26575	25.7772
1410	600	300	35.2184	0.316352	0.0866082	0.157318	0.12	2400000000000000	8300000	0.831858	0.94812	2.8919
1411	600	300	36.0887	0.329184	0.107847	0.301921	0.12	2400000000000000	8300000	0.685139	2.416	6.06942
1412	600	300	9.04605	0.247439	0.437579	0.193198	0.12	2400000000000000	8300000	0.788998	1.18188	3.41917
1413	600	300	6.7395	0.162226	0.0646726	0.405481	0.12	2400000000000000	8300000	0.834354	0.179071	0.547831
1414	600	300	32.5987	0.13071	0.41018	0.338857	0.12	2400000000000000	8300000	0.825788	3.69902	11.2002
1415	600	300	79.3862	0.147263	0.331742	0.164369	0.12	2400000000000000	8300000	0.894969	3.98148	13.0654
1416	600	300	60.014	0.279115	0.0185281	0.330731	0.12	2400000000000000	8300000	0.718193	0.641103	1.68826
1417	600	300	76.2327	0.450409	0.34912	0.33074	0.12	2400000000000000	8300000	0.756485	24.7627	68.6861
1418	600	300	50.1907	0.450052	0.16911	0.202543	0.12	2400000000000000	8300000	0.705592	4.83237	12.5021
1419	600	300	71.6722	0.414261	0.127778	0.16154	0.12	2400000000000000	8300000	0.801385	3.82778	11.2476
1420	600	300	67.5717	0.230942	0.354763	0.341998	0.12	2400000000000000	8300000	0.645451	11.8254	27.9867
1421	600	300	22.1341	0.13853	0.247459	0.497318	0.12	2400000000000000	8300000	0.710115	2.35684	6.13662
1422	600	300	34.5533	0.213574	0.360348	0.121138	0.12	2400000000000000	8300000	0.677391	2.012	4.99734
1423	600	300	71.2974	0.405327	0.30725	0.159116	0.12	2400000000000000	8300000	0.816157	8.82414	26.4069
1424	600	300	26.4629	0.262679	0.149754	0.156086	0.12	2400000000000000	8300000	0.609228	1.01483	2.26696
1425	600	300	72.9055	0.444895	0.418443	0.401974	0.12	2400000000000000	8300000	0.700341	34.0752	87.5025
1426	600	300	16.4525	0.319246	0.20184	0.272197	0.12	2400000000000000	8300000	0.824645	1.80233	5.4497
1427	600	300	12.8441	0.157558	0.0110032	0.281649	0.12	2400000000000000	8300000	0.898503	0.0391707	0.129048
1428	600	300	35.7464	0.320535	0.232966	0.352401	0.12	2400000000000000	8300000	0.874221	5.8752	18.8328
1429	600	300	30.9539	0.48632	0.30998	0.234365	0.12	2400000000000000	8300000	0.668352	6.83048	16.7389
1430	600	300	69.478	0.411373	0.411357	0.254771	0.12	2400000000000000	8300000	0.68487	18.7085	46.9805
1431	600	300	74.4317	0.235473	0.117908	0.375293	0.12	2400000000000000	8300000	0.78186	4.84394	13.8867
1432	600	300	18.1404	0.402316	0.460273	0.477374	0.12	2400000000000000	8300000	0.812166	10.0156	29.8258
1433	600	300	70.6221	0.477154	0.427201	0.417452	0.12	2400000000000000	8300000	0.797126	37.534	109.704
1434	600	300	47.9017	0.391122	0.0202297	0.123942	0.12	2400000000000000	8300000	0.775108	0.2934	0.833861
1435	600	300	38.6969	0.295488	0.18617	0.440538	0.12	2400000000000000	8300000	0.688526	5.85729	14.7873
1436	600	300	40.5083	0.30429	0.494446	0.328023	0.12	2400000000000000	8300000	0.767861	12.4865	35.1556
1437	600	300	13.5271	0.375173	0.0423238	0.124048	0.12	2400000000000000	8300000	0.694102	0.166416	0.423536
1438	600	300	26.2486	0.251608	0.355038	0.184611	0.12	2400000000000000	8300000	0.813303	2.70364	8.06255
1439	600	300	75.3177	0.202933	0.0523738	0.497813	0.12	2400000000000000	8300000	0.836779	2.48896	7.6366
1440	600	300	28.0911	0.383832	0.392749	0.322731	0.12	2400000000000000	8300000	0.739915	8.53595	23.1582
1441	600	300	13.5347	0.205854	0.0337836	0.129358	0.12	2400000000000000	8300000	0.892641	0.076049	0.24891
1442	600	300	56.2387	0.297091	0.158374	0.422674	0.12	2400000000000000	8300000	0.857439	6.98556	21.9622
1443	600	300	8.33124	0.297861	0.110414	0.466353	0.12	2400000000000000	8300000	0.680835	0.798085	1.99234
1444	600	300	8.1001	0.257645	0.0865975	0.39058	0.12	2400000000000000	8300000	0.816469	0.440874	1.31985
1445	600	300	39.011	0.310482	0.14373	0.388143	0.12	2400000000000000	8300000	0.704758	4.22038	10.9059
1446	600	300	61.4551	0.150697	0.24534	0.32205	0.12	2400000000000000	8300000	0.845959	4.57027	14.1763
1447	600	300	71.0647	0.194357	0.209839	0.395355	0.12	2400000000000000	8300000	0.856672	7.15672	22.4802
1448	600	300	40.071	0.468571	0.30794	0.289635	0.12	2400000000000000	8300000	0.778827	10.4595	29.8691
1449	600	300	31.4036	0.265131	0.146687	0.408794	0.12	2400000000000000	8300000	0.653061	3.11832	7.467
1450	600	300	61.0837	0.391926	0.449396	0.446824	0.12	2400000000000000	8300000	0.860981	30.0249	94.7866
1451	600	300	36.3832	0.220351	0.0684636	0.21222	0.12	2400000000000000	8300000	0.811477	0.727525	2.16469
1452	600	300	12.5492	0.229036	0.300371	0.276911	0.12	2400000000000000	8300000	0.684472	1.49316	3.74743
1453	600	300	13.0458	0.150732	0.388868	0.418956	0.12	2400000000000000	8300000	0.686738	2.00094	5.03845
1454	600	300	59.6389	0.284752	0.35982	0.382683	0.12	2400000000000000	8300000	0.825937	14.6052	44.2308
1455	600	300	70.8066	0.453625	0.318566	0.112061	0.12	2400000000000000	8300000	0.63018	7.16158	16.548
1456	600	300	58.9388	0.349702	0.1922	0.467978	0.12	2400000000000000	8300000	0.857018	11.5789	36.3854
1457	600	300	2.9933	0.259712	0.469906	0.210557	0.12	2400000000000000	8300000	0.844341	0.480408	1.4873
1458	600	300	45.7331	0.333437	0.248968	0.151113	0.12	2400000000000000	8300000	0.729139	3.58325	9.57985
1459	600	300	6.61296	0.279766	0.0892388	0.129442	0.12	2400000000000000	8300000	0.697987	0.133477	0.341605
1460	600	300	62.2704	0.315815	0.3064	0.338678	0.12	2400000000000000	8300000	0.604749	12.7461	28.2633
1461	600	300	44.2525	0.106578	0.249118	0.459714	0.12	2400000000000000	8300000	0.728557	3.37352	9.01194
1462	600	300	62.4156	0.245672	0.235199	0.478568	0.12	2400000000000000	8300000	0.833597	10.7799	32.9489
1463	600	300	19.2324	0.163006	0.0749342	0.264219	0.12	2400000000000000	8300000	0.819723	0.387676	1.16522
1464	600	300	37.1731	0.366304	0.337641	0.129699	0.12	2400000000000000	8300000	0.632337	3.72435	8.63515
1465	600	300	41.6031	0.225965	0.168314	0.495112	0.12	2400000000000000	8300000	0.637788	4.89301	11.4426
1466	600	300	44.4443	0.239648	0.394522	0.16671	0.12	2400000000000000	8300000	0.725525	4.37531	11.6395
1467	600	300	43.6772	0.245541	0.258496	0.360763	0.12	2400000000000000	8300000	0.698597	6.24658	16.0007
1468	600	300	16.0229	0.446804	0.423805	0.194449	0.12	2400000000000000	8300000	0.847398	3.68483	11.4492
1469	600	300	58.8626	0.130729	0.271563	0.258722	0.12	2400000000000000	8300000	0.609236	3.37678	7.54328
1470	600	300	5.44334	0.177753	0.0671924	0.174838	0.12	2400000000000000	8300000	0.694984	0.0709945	0.180914
1471	600	300	51.3342	0.338112	0.354936	0.356604	0.12	2400000000000000	8300000	0.661466	13.7212	33.2791
1472	600	300	3.98937	0.144681	0.326738	0.170677	0.12	2400000000000000	8300000	0.847794	0.201038	0.624943
1473	600	300	69.025	0.457694	0.289452	0.177054	0.12	2400000000000000	8300000	0.76681	10.1123	28.4321
1474	600	300	9.51797	0.310905	0.374494	0.477939	0.12	2400000000000000	8300000	0.684629	3.30808	8.30429
1475	600	300	2.37201	0.188534	0.352948	0.340469	0.12	2400000000000000	8300000	0.655621	0.335645	0.806871
1476	600	300	11.005	0.499735	0.246604	0.389658	0.12	2400000000000000	8300000	0.619506	3.30067	7.49753
1477	600	300	23.0906	0.251874	0.0251136	0.257762	0.12	2400000000000000	8300000	0.876926	0.235144	0.756079
1478	600	300	69.5455	0.233479	0.322079	0.226822	0.12	2400000000000000	8300000	0.757874	7.40885	20.5883
1479	600	300	6.88124	0.261046	0.125783	0.274343	0.12	2400000000000000	8300000	0.703434	0.387156	0.998575
1480	600	300	73.3115	0.26004	0.489383	0.367103	0.12	2400000000000000	8300000	0.759797	21.3912	59.5943
1481	600	300	79.1389	0.268443	0.234603	0.286741	0.12	2400000000000000	8300000	0.611949	8.92592	20.0281
1482	600	300	63.0465	0.279183	0.467671	0.192117	0.12	2400000000000000	8300000	0.746396	9.87742	27.0324
1483	600	300	47.8626	0.157461	0.375528	0.166441	0.12	2400000000000000	8300000	0.666954	2.94211	7.19491
1484	600	300	43.4557	0.179518	0.120264	0.353731	0.12	2400000000000000	8300000	0.893082	2.07277	6.78755
1485	600	300	64.9471	0.498398	0.138984	0.173651	0.12	2400000000000000	8300000	0.858411	4.87938	15.3579
1486	600	300	31.3284	0.29081	0.225121	0.181669	0.12	2400000000000000	8300000	0.733885	2.32719	6.26226
1487	600	300	21.5669	0.250083	0.00883677	0.102274	0.12	2400000000000000	8300000	0.66066	0.030445	0.0737507
1488	600	300	17.8102	0.458488	0.202987	0.166245	0.12	2400000000000000	8300000	0.616819	1.72107	3.8925
1489	600	300	45.3648	0.273544	0.415803	0.403824	0.12	2400000000000000	8300000	0.673876	13.014	32.156
1490	600	300	74.012	0.192444	0.187939	0.231973	0.12	2400000000000000	8300000	0.685759	3.87837	9.75197
1491	600	300	55.8001	0.407311	0.106994	0.1808	0.12	2400000000000000	8300000	0.838151	2.74604	8.43917
1492	600	300	11.5388	0.475541	0.215066	0.398512	0.12	2400000000000000	8300000	0.685908	2.93731	7.38731
1493	600	300	38.0706	0.327402	0.387851	0.293477	0.12	2400000000000000	8300000	0.829736	8.86133	26.9594
1494	600	300	29.4814	0.346992	0.280396	0.228415	0.12	2400000000000000	8300000	0.778531	4.09215	11.6815
1495	600	300	6.87558	0.138011	0.243306	0.374265	0.12	2400000000000000	8300000	0.876108	0.539686	1.73369
1496	600	300	26.5987	0.447117	0.258278	0.359034	0.12	2400000000000000	8300000	0.805208	6.88798	20.3363
1497	600	300	23.0153	0.240035	0.428339	0.270242	0.12	2400000000000000	8300000	0.810175	3.99409	11.865
1498	600	300	62.1548	0.327568	0.356093	0.164847	0.12	2400000000000000	8300000	0.62814	7.46463	17.1924
1499	600	300	32.1086	0.127966	0.029285	0.246766	0.12	2400000000000000	8300000	0.642717	0.185453	0.437045
1500	600	300	54.0212	0.102698	0.184629	0.339912	0.12	2400000000000000	8300000	0.665014	2.1746	5.30251
1501	600	300	45.6442	0.164325	0.103154	0.19216	0.12	2400000000000000	8300000	0.609381	0.928597	2.07485
1502	600	300	45.6559	0.452634	0.0809975	0.275205	0.12	2400000000000000	8300000	0.620779	2.87713	6.5489
1503	600	300	28.7344	0.357375	0.0232042	0.470593	0.12	2400000000000000	8300000	0.75717	0.700368	1.94442
1504	600	300	9.64893	0.147908	0.0746742	0.190548	0.12	2400000000000000	8300000	0.789822	0.126833	0.367311
1505	600	300	70.1903	0.356764	0.346117	0.16979	0.12	2400000000000000	8300000	0.665538	9.19136	22.4297
1506	600	300	57.3737	0.237022	0.144239	0.47203	0.12	2400000000000000	8300000	0.894375	5.78285	18.9641
1507	600	300	16.2868	0.12833	0.312557	0.323612	0.12	2400000000000000	8300000	0.651189	1.3204	3.15271
1508	600	300	52.4935	0.391551	0.422742	0.445152	0.12	2400000000000000	8300000	0.717984	24.1582	63.599
1509	600	300	6.84695	0.167309	0.408645	0.402449	0.12	2400000000000000	8300000	0.641462	1.17669	2.7676
1510	600	300	58.5683	0.137343	0.252581	0.380878	0.12	2400000000000000	8300000	0.680542	4.83329	12.0606
1511	600	300	49.9396	0.338723	0.325754	0.125284	0.12	2400000000000000	8300000	0.671234	4.31183	10.6122
1512	600	300	16.9348	0.279218	0.221125	0.299536	0.12	2400000000000000	8300000	0.79093	1.95613	5.67292
1513	600	300	21.8064	0.243628	0.115622	0.219685	0.12	2400000000000000	8300000	0.784172	0.842827	2.42338
1514	600	300	40.508	0.158107	0.0508629	0.403388	0.12	2400000000000000	8300000	0.636612	0.820735	1.91579
1515	600	300	55.3983	0.143338	0.223206	0.19723	0.12	2400000000000000	8300000	0.718555	2.18336	5.7525
1516	600	300	23.1058	0.387775	0.283821	0.245809	0.12	2400000000000000	8300000	0.885454	3.90419	12.6756
1517	600	300	17.5858	0.215552	0.134238	0.112861	0.12	2400000000000000	8300000	0.69599	0.35869	0.915365
1518	600	300	50.0881	0.334706	0.0842984	0.391477	0.12	2400000000000000	8300000	0.728067	3.4555	9.22472
1519	600	300	29.7742	0.353514	0.368076	0.198118	0.12	2400000000000000	8300000	0.876887	4.79397	15.4138
1520	600	300	9.3295	0.235688	0.399656	0.173234	0.12	2400000000000000	8300000	0.866546	0.950825	3.02109
1521	600	300	56.5193	0.453813	0.284362	0.274587	0.12	2400000000000000	8300000	0.805649	12.5087	36.9514
1522	600	300	11.2025	0.269756	0.35547	0.399634	0.12	2400000000000000	8300000	0.885205	2.68125	8.70269
1523	600	300	2.40727	0.144965	0.188278	0.332385	0.12	2400000000000000	8300000	0.61572	0.1364	0.307942
1524	600	300	79.5654	0.475959	0.348467	0.107487	0.12	2400000000000000	8300000	0.742371	8.85928	24.1152
1525	600	300	6.7491	0.303916	0.0929606	0.403369	0.12	2400000000000000	8300000	0.861903	0.480383	1.51816
1526	600	300	35.3815	0.151839	0.368332	0.357904	0.12	2400000000000000	8300000	0.825872	4.42336	13.3948
1527	600	300	62.671	0.14708	0.0354327	0.101925	0.12	2400000000000000	8300000	0.661312	0.207919	0.504164
1528	600	300	68.9268	0.113328	0.306195	0.442323	0.12	2400000000000000	8300000	0.752141	6.60772	18.2231
1529	600	300	20.9135	0.309428	0.47451	0.157432	0.12	2400000000000000	8300000	0.679411	3.01933	7.52168
1530	600	300	13.9926	0.420372	0.0329528	0.28657	0.12	2400000000000000	8300000	0.680139	0.346931	0.865191
1531	600	300	30.6898	0.209748	0.133563	0.375109	0.12	2400000000000000	8300000	0.804836	2.01429	5.9443
1532	600	300	42.8778	0.126699	0.0201326	0.413479	0.12	2400000000000000	8300000	0.799585	0.282452	0.828098
1533	600	300	68.873	0.257164	0.0974353	0.46875	0.12	2400000000000000	8300000	0.681629	5.05247	12.6277
1534	600	300	69.2959	0.475808	0.1226	0.470482	0.12	2400000000000000	8300000	0.670324	11.8784	29.1955
1535	600	300	19.1372	0.29974	0.391383	0.332916	0.12	2400000000000000	8300000	0.891154	4.66816	15.2535
1536	600	300	61.4514	0.153599	0.300405	0.185317	0.12	2400000000000000	8300000	0.751135	3.28193	9.03896
1537	600	300	15.8443	0.362208	0.237986	0.242332	0.12	2400000000000000	8300000	0.737188	2.06719	5.58767
1538	600	300	79.1466	0.181084	0.0952171	0.144918	0.12	2400000000000000	8300000	0.883256	1.2352	4.00034
1539	600	300	23.3905	0.42309	0.0208875	0.117207	0.12	2400000000000000	8300000	0.805127	0.151322	0.446721
1540	600	300	58.7004	0.419281	0.032253	0.286386	0.12	2400000000000000	8300000	0.87576	1.41989	4.55943
1541	600	300	69.2471	0.497907	0.233382	0.140471	0.12	2400000000000000	8300000	0.707932	7.05976	18.3254
1542	600	300	15.1896	0.481136	0.391258	0.118019	0.12	2400000000000000	8300000	0.837522	2.10775	6.4727
1543	600	300	37.7172	0.406608	0.284285	0.171739	0.12	2400000000000000	8300000	0.764582	4.67654	13.1105
1544	600	300	79.4126	0.390379	0.0273432	0.361817	0.12	2400000000000000	8300000	0.667249	1.91559	4.68663
1545	600	300	30.9157	0.412423	0.349981	0.468431	0.12	2400000000000000	8300000	0.85302	13.0557	40.8347
1546	600	300	38.2071	0.34298	0.228837	0.463004	0.12	2400000000000000	8300000	0.668466	8.67186	21.2551
1547	600	300	69.5184	0.154116	0.0295016	0.106787	0.12	2400000000000000	8300000	0.716117	0.210813	0.553544
1548	600	300	16.7016	0.219609	0.486448	0.453703	0.12	2400000000000000	8300000	0.753195	5.05597	13.9632
1549	600	300	15.6148	0.20283	0.031362	0.432681	0.12	2400000000000000	8300000	0.652336	0.268427	0.642051
1550	600	300	51.6597	0.485353	0.463954	0.13018	0.12	2400000000000000	8300000	0.836798	9.45837	29.0207
1551	600	300	72.5303	0.324666	0.119544	0.341298	0.12	2400000000000000	8300000	0.625242	6.00075	13.757
1552	600	300	59.8314	0.276218	0.0193842	0.227664	0.12	2400000000000000	8300000	0.892679	0.455522	1.49099
1553	600	300	31.9957	0.192251	0.0535985	0.288619	0.12	2400000000000000	8300000	0.85168	0.594328	1.85598
1554	600	300	16.9374	0.412306	0.242614	0.188105	0.12	2400000000000000	8300000	0.879545	1.99053	6.41946
1555	600	300	3.62445	0.161922	0.122135	0.446699	0.12	2400000000000000	8300000	0.734463	0.199981	0.538555
1556	600	300	53.9737	0.2102	0.0729846	0.112561	0.12	2400000000000000	8300000	0.676008	0.582134	1.44293
1557	600	300	57.2992	0.24103	0.214481	0.275825	0.12	2400000000000000	8300000	0.685476	5.10307	12.8261
1558	600	300	24.4887	0.299359	0.446544	0.32401	0.12	2400000000000000	8300000	0.819946	6.62473	19.917
1559	600	300	4.74637	0.417325	0.138034	0.200631	0.12	2400000000000000	8300000	0.757735	0.342616	0.951912
1560	600	300	47.6039	0.24369	0.438395	0.362649	0.12	2400000000000000	8300000	0.808494	11.5191	34.1482
1561	600	300	59.7696	0.17894	0.0480282	0.464118	0.12	2400000000000000	8300000	0.799355	1.48902	4.36427
1562	600	300	32.7408	0.165063	0.336966	0.364252	0.12	2400000000000000	8300000	0.642312	4.143	9.75737
1563	600	300	76.0726	0.268337	0.157599	0.397141	0.12	2400000000000000	8300000	0.889939	7.97982	26.0391
1564	600	300	33.527	0.231648	0.0407647	0.223486	0.12	2400000000000000	8300000	0.858156	0.44192	1.39053
1565	600	300	78.8888	0.381759	0.258071	0.296447	0.12	2400000000000000	8300000	0.719209	14.3906	37.9495
1566	600	300	79.612	0.431752	0.0380148	0.220142	0.12	2400000000000000	8300000	0.841598	1.79662	5.54411
1567	600	300	76.5757	0.209454	0.352697	0.472602	0.12	2400000000000000	8300000	0.747112	16.698	45.7426
1568	600	300	47.6915	0.237973	0.178376	0.499086	0.12	2400000000000000	8300000	0.760892	6.31056	17.6061
1569	600	300	11.9477	0.309186	0.349969	0.117618	0.12	2400000000000000	8300000	0.643664	0.949716	2.24143
1570	600	300	27.0673	0.495157	0.159579	0.407307	0.12	2400000000000000	8300000	0.637123	5.44092	12.7106
1571	600	300	19.9106	0.444765	0.265427	0.407955	0.12	2400000000000000	8300000	0.850368	5.98906	18.674
1572	600	300	21.7326	0.100459	0.389954	0.342797	0.12	2400000000000000	8300000	0.832131	1.82279	5.56159
1573	600	300	59.252	0.376277	0.207125	0.2073	0.12	2400000000000000	8300000	0.601713	5.97903	13.1914
1574	600	300	20.8501	0.22684	0.109455	0.309294	0.12	2400000000000000	8300000	0.688044	1.00005	2.52296
1575	600	300	31.7748	0.193784	0.0547981	0.306929	0.12	2400000000000000	8300000	0.686493	0.64683	1.62816
1576	600	300	5.179	0.286704	0.0195839	0.282066	0.12	2400000000000000	8300000	0.731064	0.051229	0.137323
1577	600	300	22.0878	0.345591	0.483775	0.305604	0.12	2400000000000000	8300000	0.653008	7.04863	16.877
1578	600	300	9.36221	0.204219	0.195637	0.194082	0.12	2400000000000000	8300000	0.842402	0.453417	1.40052
1579	600	300	14.8747	0.444757	0.302851	0.344889	0.12	2400000000000000	8300000	0.711771	4.31585	11.2636
1580	600	300	57.2799	0.450235	0.320948	0.168695	0.12	2400000000000000	8300000	0.748208	8.72099	23.9254
1581	600	300	13.7342	0.114241	0.0574732	0.495982	0.12	2400000000000000	8300000	0.602776	0.279346	0.617404
1582	600	300	26.9494	0.22725	0.26289	0.25713	0.12	2400000000000000	8300000	0.784029	2.58563	7.43311
1583	600	300	6.52634	0.276042	0.230668	0.302717	0.12	2400000000000000	8300000	0.795725	0.785698	2.2924
1584	600	300	34.5229	0.338815	0.144588	0.192545	0.12	2400000000000000	8300000	0.708051	2.03386	5.28029
1585	600	300	54.5869	0.273803	0.499476	0.411884	0.12	2400000000000000	8300000	0.760095	19.2045	53.5233
1586	600	300	18.5908	0.220886	0.140923	0.243335	0.12	2400000000000000	8300000	0.68207	0.879509	2.19959
1587	600	300	37.0339	0.319607	0.473809	0.238652	0.12	2400000000000000	8300000	0.679885	8.35931	20.839
1588	600	300	66.1003	0.286598	0.448066	0.412703	0.12	2400000000000000	8300000	0.634526	21.8798	50.9054
1589	600	300	36.7877	0.461742	0.395572	0.254271	0.12	2400000000000000	8300000	0.878259	10.6712	34.3641
1590	600	300	51.5753	0.250087	0.105098	0.231315	0.12	2400000000000000	8300000	0.697147	1.95848	5.00628
1591	600	300	60.7549	0.147337	0.0828008	0.24655	0.12	2400000000000000	8300000	0.670191	1.14135	2.80472
1592	600	300	64.3419	0.183471	0.227582	0.148284	0.12	2400000000000000	8300000	0.676652	2.48816	6.17327
1593	600	300	30.6017	0.463169	0.331477	0.160666	0.12	2400000000000000	8300000	0.641367	4.71465	11.0873
1594	600	300	19.2171	0.101288	0.459015	0.285309	0.12	2400000000000000	8300000	0.768306	1.59213	4.48521
1595	600	300	20.7452	0.116518	0.138197	0.236145	0.12	2400000000000000	8300000	0.723692	0.49269	1.30737
1596	600	300	51.0234	0.419451	0.00331739	0.359071	0.12	2400000000000000	8300000	0.692922	0.159226	0.404548
1597	600	300	4.58024	0.494949	0.112254	0.485111	0.12	2400000000000000	8300000	0.600366	0.771044	1.69733
1598	600	300	58.3636	0.294057	0.259876	0.382918	0.12	2400000000000000	8300000	0.767844	10.6668	30.0315
1599	600	300	15.9705	0.195719	0.21229	0.102161	0.12	2400000000000000	8300000	0.818649	0.423401	1.27093
1600	600	300	28.5983	0.18249	0.326427	0.485094	0.12	2400000000000000	8300000	0.842407	5.16154	15.9431
1601	600	300	65.451	0.44012	0.387439	0.279295	0.12	2400000000000000	8300000	0.620207	19.4689	44.274
1602	600	300	51.7002	0.328531	0.157363	0.290662	0.12	2400000000000000	8300000	0.618798	4.85227	11.0094
1603	600	300	6.64298	0.332959	0.00284771	0.322617	0.12	2400000000000000	8300000	0.820746	0.0126918	0.0381948
1604	600	300	78.7971	0.474081	0.292646	0.389404	0.12	2400000000000000	8300000	0.69193	26.5884	67.4569
1605	600	300	67.4016	0.369219	0.0352185	0.221733	0.12	2400000000000000	8300000	0.651423	1.21379	2.89919
1606	600	300	20.5133	0.479521	0.391205	0.256888	0.12	2400000000000000	8300000	0.745887	6.17414	16.8858
1607	600	300	19.3995	0.170505	0.43518	0.127759	0.12	2400000000000000	8300000	0.622354	1.14861	2.62109
1608	600	300	73.1592	0.262404	0.391826	0.483118	0.12	2400000000000000	8300000	0.69258	22.6973	57.6389
1609	600	300	24.9366	0.478457	0.105322	0.146478	0.12	2400000000000000	8300000	0.844593	1.14963	3.56023
1610	600	300	29.6794	0.361668	0.191234	0.12505	0.12	2400000000000000	8300000	0.848443	1.60325	4.98765
1611	600	300	6.82303	0.222356	0.0825967	0.323836	0.12	2400000000000000	8300000	0.773999	0.253455	0.719304
1612	600	300	33.5606	0.284293	0.374974	0.425383	0.12	2400000000000000	8300000	0.858327	9.50527	29.915
1613	600	300	37.5992	0.356584	0.185356	0.350811	0.12	2400000000000000	8300000	0.7317	5.4451	14.6087
1614	600	300	77.8749	0.187855	0.341845	0.178303	0.12	2400000000000000	8300000	0.695851	5.56925	14.2097
1615	600	300	67.1202	0.16601	0.0369326	0.376777	0.12	2400000000000000	8300000	0.788227	0.968431	2.79893
1616	600	300	18.2075	0.385203	0.419096	0.373957	0.12	2400000000000000	8300000	0.712071	6.86532	17.9249
1617	600	300	3.27783	0.295992	0.307225	0.219786	0.12	2400000000000000	8300000	0.819458	0.409177	1.22945
1618	600	300	72.5517	0.331105	0.309826	0.14586	0.12	2400000000000000	8300000	0.642187	6.78039	15.9657
1619	600	300	75.8082	0.21338	0.492312	0.178506	0.12	2400000000000000	8300000	0.645084	8.87872	21.0009
1620	600	300	79.2317	0.386879	0.22616	0.139077	0.12	2400000000000000	8300000	0.789492	6.02187	17.4321
1621	600	300	63.2548	0.430928	0.468513	0.155726	0.12	2400000000000000	8300000	0.753354	12.4213	34.3114
1622	600	300	42.0089	0.187212	0.361255	0.452213	0.12	2400000000000000	8300000	0.689297	8.02452	20.2814
1623	600	300	79.7882	0.496264	0.152524	0.354272	0.12	2400000000000000	8300000	0.895852	13.3633	43.8957
1624	600	300	36.0118	0.29582	0.111697	0.452754	0.12	2400000000000000	8300000	0.826371	3.36484	10.1955
1625	600	300	26.9819	0.432513	0.12823	0.342425	0.12	2400000000000000	8300000	0.665072	3.20049	7.8047
1626	600	300	76.0411	0.205772	0.0347804	0.44861	0.12	2400000000000000	8300000	0.67811	1.52485	3.79139
1627	600	300	29.2645	0.406926	0.0295838	0.492483	0.12	2400000000000000	8300000	0.80421	1.08365	3.19543
1628	600	300	52.891	0.448229	0.220041	0.109739	0.12	2400000000000000	8300000	0.606475	3.57548	7.95094
1629	600	300	7.98342	0.127974	0.292147	0.322531	0.12	2400000000000000	8300000	0.695724	0.601272	1.53384
1630	600	300	79.6976	0.266127	0.401425	0.157498	0.12	2400000000000000	8300000	0.709283	8.37534	21.7818
1631	600	300	21.1951	0.156156	0.161263	0.257117	0.12	2400000000000000	8300000	0.758574	0.857126	2.38404
1632	600	300	21.6518	0.216026	0.109858	0.245773	0.12	2400000000000000	8300000	0.823484	0.788771	2.38165
1633	600	300	62.028	0.234289	0.0434729	0.340219	0.12	2400000000000000	8300000	0.824497	1.34247	4.05848
1634	600	300	74.1015	0.23279	0.268198	0.192933	0.12	2400000000000000	8300000	0.708472	5.57492	14.4822
1635	600	300	6.8917	0.176165	0.485939	0.149191	0.12	2400000000000000	8300000	0.682352	0.549741	1.37543
1636	600	300	3.12756	0.26647	0.358221	0.297949	0.12	2400000000000000	8300000	0.613931	0.555563	1.25062
1637	600	300	14.2328	0.219692	0.0340405	0.22518	0.12	2400000000000000	8300000	0.792746	0.149698	0.435134
1638	600	300	70.7145	0.150416	0.380283	0.367722	0.12	2400000000000000	8300000	0.733223	9.28999	24.976
1639	600	300	26.8639	0.497757	0.334116	0.273167	0.12	2400000000000000	8300000	0.726856	7.62255	20.3151
1640	600	300	16.3913	0.21409	0.0447106	0.443405	0.12	2400000000000000	8300000	0.665459	0.434517	1.06023
1641	600	300	10.559	0.21639	0.0318219	0.281072	0.12	2400000000000000	8300000	0.872434	0.127641	0.408315
1642	600	300	5.06815	0.334028	0.450481	0.431059	0.12	2400000000000000	8300000	0.876586	2.05321	6.59931
1643	600	300	72.5618	0.137395	0.124721	0.464286	0.12	2400000000000000	8300000	0.738562	3.60571	9.76448
1644	600	300	2.43396	0.305074	0.249739	0.215471	0.12	2400000000000000	8300000	0.747076	0.249563	0.683623
1645	600	300	70.3773	0.362134	0.437081	0.173796	0.12	2400000000000000	8300000	0.670913	12.0918	29.7459
1646	600	300	44.58	0.343389	0.456144	0.481658	0.12	2400000000000000	8300000	0.770245	21.0065	59.3271
1647	600	300	34.4888	0.423388	0.255573	0.215418	0.12	2400000000000000	8300000	0.724467	5.02111	13.338
1648	600	300	37.0071	0.448647	0.095053	0.246788	0.12	2400000000000000	8300000	0.636119	2.43258	5.67384
1649	600	300	6.57864	0.397932	0.36288	0.275843	0.12	2400000000000000	8300000	0.71383	1.63665	4.28374
1650	600	300	6.34989	0.188886	0.237486	0.180009	0.12	2400000000000000	8300000	0.726432	0.320247	0.853005
1651	600	300	73.9333	0.458446	0.0438719	0.153949	0.12	2400000000000000	8300000	0.652122	1.42981	3.41884
1652	600	300	25.8094	0.411857	0.0700568	0.49938	0.12	2400000000000000	8300000	0.718426	2.3227	6.11852
1653	600	300	62.3324	0.264281	0.468586	0.159212	0.12	2400000000000000	8300000	0.661504	7.67592	18.6181
1654	600	300	35.3803	0.366476	0.0296032	0.343743	0.12	2400000000000000	8300000	0.755746	0.824076	2.28357
1655	600	300	9.11475	0.464551	0.278383	0.238407	0.12	2400000000000000	8300000	0.611859	1.7552	3.93777
1656	600	300	77.8331	0.329088	0.410171	0.146869	0.12	2400000000000000	8300000	0.666427	9.63738	23.5496
1657	600	300	20.037	0.36221	0.0146078	0.445752	0.12	2400000000000000	8300000	0.717281	0.29516	0.776279
1658	600	300	50.9523	0.314709	0.308881	0.315691	0.12	2400000000000000	8300000	0.854493	9.76591	30.598
1659	600	300	43.4358	0.473464	0.451906	0.112126	0.12	2400000000000000	8300000	0.863824	6.50845	20.6146
1660	600	300	15.9213	0.44841	0.452401	0.253559	0.12	2400000000000000	8300000	0.696662	5.11498	13.0658
1661	600	300	66.5458	0.495583	0.428454	0.487093	0.12	2400000000000000	8300000	0.679027	42.9873	107.028
1662	600	300	20.3305	0.141934	0.445973	0.263598	0.12	2400000000000000	8300000	0.647405	2.11871	5.02943
1663	600	300	18.5994	0.200607	0.470047	0.305046	0.12	2400000000000000	8300000	0.671998	3.34148	8.23339
1664	600	300	68.3353	0.233497	0.0363428	0.390628	0.12	2400000000000000	8300000	0.802296	1.4148	4.162
1665	600	300	2.44367	0.487433	0.105225	0.30082	0.12	2400000000000000	8300000	0.614295	0.235488	0.530417
1666	600	300	55.024	0.314348	0.15666	0.366988	0.12	2400000000000000	8300000	0.890234	6.21096	20.2738
1667	600	300	15.5513	0.37024	0.0535487	0.2694	0.12	2400000000000000	8300000	0.865418	0.51878	1.64619
1668	600	300	15.5867	0.242557	0.287765	0.207595	0.12	2400000000000000	8300000	0.618972	1.41062	3.2015
1669	600	300	52.3545	0.219174	0.165538	0.217384	0.12	2400000000000000	8300000	0.840531	2.57902	7.94841
1670	600	300	2.89827	0.301567	0.0374803	0.46661	0.12	2400000000000000	8300000	0.773766	0.0954697	0.270861
1671	600	300	72.1788	0.402504	0.077636	0.346942	0.12	2400000000000000	8300000	0.869868	4.8875	15.5888
1672	600	300	1.29056	0.162987	0.0824382	0.219932	0.12	2400000000000000	8300000	0.768735	0.0238197	0.0671406
1673	600	300	75.0031	0.489034	0.193029	0.112432	0.12	2400000000000000	8300000	0.700586	4.97186	12.7718
1674	600	300	53.0387	0.362307	0.120329	0.482506	0.12	2400000000000000	8300000	0.633898	6.96831	16.1964
1675	600	300	75.2819	0.229042	0.171596	0.361989	0.12	2400000000000000	8300000	0.681843	6.6895	16.7244
1676	600	300	78.9751	0.190286	0.090755	0.349357	0.12	2400000000000000	8300000	0.646633	2.97593	7.0559
1677	600	300	72.1667	0.149969	0.327604	0.382366	0.12	2400000000000000	8300000	0.878549	8.4675	27.2767
1678	600	300	54.7449	0.320812	0.154054	0.323859	0.12	2400000000000000	8300000	0.647344	5.4728	12.9902
1679	600	300	28.335	0.460927	0.29917	0.14331	0.12	2400000000000000	8300000	0.898358	3.49733	11.5201
1680	600	300	15.1788	0.477246	0.258282	0.26608	0.12	2400000000000000	8300000	0.896018	3.10937	10.2155
1681	600	300	73.7229	0.119574	0.344316	0.283351	0.12	2400000000000000	8300000	0.840259	5.37166	16.5498
1682	600	300	20.8017	0.167579	0.413862	0.378716	0.12	2400000000000000	8300000	0.616248	3.41252	7.71085
1683	600	300	54.5419	0.27428	0.394473	0.184094	0.12	2400000000000000	8300000	0.789972	6.78528	19.654
1684	600	300	73.7055	0.252439	0.099796	0.457121	0.12	2400000000000000	8300000	0.746179	5.30137	14.5045
1685	600	300	15.9078	0.277522	0.455572	0.323737	0.12	2400000000000000	8300000	0.896992	4.06671	13.3753
1686	600	300	61.4704	0.44396	0.139079	0.445216	0.12	2400000000000000	8300000	0.827646	10.5543	32.0293
1687	600	300	17.7699	0.26277	0.0248414	0.308164	0.12	2400000000000000	8300000	0.657218	0.223258	0.538007
1688	600	300	62.3188	0.387193	0.139827	0.303408	0.12	2400000000000000	8300000	0.680332	6.39372	15.9494
1689	600	300	24.5316	0.402798	0.122393	0.214311	0.12	2400000000000000	8300000	0.891651	1.61883	5.29259
1690	600	300	41.544	0.379715	0.134686	0.248702	0.12	2400000000000000	8300000	0.74204	3.30031	8.97953
1691	600	300	33.3995	0.109637	0.160754	0.423546	0.12	2400000000000000	8300000	0.67396	1.5572	3.84814
1692	600	300	31.3911	0.27197	0.25942	0.152195	0.12	2400000000000000	8300000	0.800143	2.10532	6.17672
1693	600	300	20.401	0.308482	0.00158033	0.136425	0.12	2400000000000000	8300000	0.898378	0.00847439	0.0279151
1694	600	300	55.7366	0.464504	0.059335	0.446351	0.12	2400000000000000	8300000	0.61449	4.28256	9.64917
1695	600	300	27.3252	0.449493	0.305137	0.37665	0.12	2400000000000000	8300000	0.81082	8.81671	26.2121
1696	600	300	1.81301	0.386309	0.271055	0.248676	0.12	2400000000000000	8300000	0.60609	0.294858	0.655271
1697	600	300	70.2349	0.495796	0.253926	0.15988	0.12	2400000000000000	8300000	0.891875	8.82968	28.8749
1698	600	300	26.6705	0.463843	0.178871	0.285434	0.12	2400000000000000	8300000	0.829192	3.94489	11.9939
1699	600	300	19.4199	0.322301	0.462765	0.267721	0.12	2400000000000000	8300000	0.792189	4.84324	14.0681
1700	600	300	13.7708	0.372394	0.124074	0.473393	0.12	2400000000000000	8300000	0.685998	1.88127	4.73202
1701	600	300	10.4311	0.202166	0.251133	0.23612	0.12	2400000000000000	8300000	0.859303	0.781018	2.46082
1702	600	300	74.4037	0.479848	0.298649	0.477452	0.12	2400000000000000	8300000	0.882616	31.7963	102.901
1703	600	300	10.0382	0.153999	0.0614862	0.181292	0.12	2400000000000000	8300000	0.622222	0.107626	0.245546
1704	600	300	79.3275	0.390545	0.456072	0.206	0.12	2400000000000000	8300000	0.639385	18.1795	42.6202
1705	600	300	61.755	0.197286	0.451515	0.131834	0.12	2400000000000000	8300000	0.71647	4.52955	11.8994
1706	600	300	72.3978	0.352643	0.451821	0.260935	0.12	2400000000000000	8300000	0.842478	18.7994	58.0731
1707	600	300	9.56494	0.438178	0.0776005	0.453857	0.12	2400000000000000	8300000	0.665129	0.92194	2.24843
1708	600	300	75.1722	0.17648	0.174642	0.261547	0.12	2400000000000000	8300000	0.885862	3.78475	12.2935
1709	600	300	43.8171	0.146593	0.0172048	0.203638	0.12	2400000000000000	8300000	0.779849	0.140557	0.401915
1710	600	300	63.5538	0.118797	0.251377	0.164014	0.12	2400000000000000	8300000	0.840291	1.94421	5.99025
1711	600	300	77.9865	0.121571	0.203293	0.180356	0.12	2400000000000000	8300000	0.88427	2.17114	7.03953
1712	600	300	1.52765	0.499049	0.334551	0.150982	0.12	2400000000000000	8300000	0.762294	0.240515	0.672258
1713	600	300	45.7726	0.220396	0.0195457	0.396353	0.12	2400000000000000	8300000	0.820244	0.488123	1.46806
1714	600	300	49.958	0.260581	0.16776	0.104831	0.12	2400000000000000	8300000	0.627743	1.42992	3.29129
1715	600	300	42.0149	0.411	0.023022	0.304374	0.12	2400000000000000	8300000	0.680721	0.755757	1.88635
1716	600	300	72.9811	0.428586	0.0668429	0.44494	0.12	2400000000000000	8300000	0.878021	5.81022	18.7055
1717	600	300	42.0381	0.416825	0.423865	0.491026	0.12	2400000000000000	8300000	0.72524	22.778	60.5715
1718	600	300	5.80069	0.250361	0.468359	0.150039	0.12	2400000000000000	8300000	0.845527	0.637404	1.97612
1719	600	300	29.9439	0.272835	0.399801	0.482995	0.12	2400000000000000	8300000	0.813849	9.85331	29.4034
1720	600	300	71.4321	0.258146	0.285659	0.402798	0.12	2400000000000000	8300000	0.756456	13.2519	36.7566
1721	600	300	66.3868	0.110437	0.378084	0.299551	0.12	2400000000000000	8300000	0.736419	5.18611	14.0036
1722	600	300	50.5691	0.178953	0.365315	0.117751	0.12	2400000000000000	8300000	0.77992	2.43133	6.9529
1723	600	300	59.486	0.280964	0.292275	0.104847	0.12	2400000000000000	8300000	0.685141	3.1989	8.03621
1724	600	300	57.3038	0.489004	0.292461	0.497303	0.12	2400000000000000	8300000	0.649326	25.4549	60.6046
1725	600	300	17.4215	0.284834	0.0295842	0.221401	0.12	2400000000000000	8300000	0.629442	0.203003	0.468522
1726	600	300	51.1192	0.398822	0.490166	0.265254	0.12	2400000000000000	8300000	0.837791	16.556	50.8584
1727	600	300	77.2493	0.111301	0.0853256	0.449595	0.12	2400000000000000	8300000	0.735262	2.06007	5.55387
1728	600	300	16.7066	0.445657	0.47141	0.14993	0.12	2400000000000000	8300000	0.678778	3.28673	8.18018
1729	600	300	3.48272	0.252192	0.0725174	0.302262	0.12	2400000000000000	8300000	0.642031	0.120244	0.283067
1730	600	300	19.0608	0.21849	0.206308	0.46667	0.12	2400000000000000	8300000	0.859145	2.50429	7.88902
1731	600	300	55.585	0.127602	0.461331	0.136945	0.12	2400000000000000	8300000	0.801913	2.79873	8.22924
1732	600	300	10.2335	0.399265	0.162102	0.362903	0.12	2400000000000000	8300000	0.82761	1.50123	4.55559
1733	600	300	34.2554	0.419969	0.248584	0.222832	0.12	2400000000000000	8300000	0.780004	4.97719	14.2349
1734	600	300	64.7111	0.123528	0.210398	0.369895	0.12	2400000000000000	8300000	0.685745	3.88554	9.76979
1735	600	300	74.8635	0.302436	0.17465	0.420093	0.12	2400000000000000	8300000	0.719583	10.3754	27.3752
1736	600	300	76.358	0.275457	0.436104	0.334872	0.12	2400000000000000	8300000	0.739327	19.1851	52.0083
1737	600	300	71.7018	0.319964	0.308648	0.45481	0.12	2400000000000000	8300000	0.876068	20.1146	64.6132
1738	600	300	27.2925	0.490284	0.272649	0.289682	0.12	2400000000000000	8300000	0.726945	6.6009	17.5945
1739	600	300	66.0367	0.45395	0.323665	0.312352	0.12	2400000000000000	8300000	0.744779	18.9287	51.6914
1740	600	300	58.3162	0.14912	0.0905527	0.364537	0.12	2400000000000000	8300000	0.750112	1.79289	4.9312
1741	600	300	17.793	0.159306	0.0878042	0.251064	0.12	2400000000000000	8300000	0.604403	0.390274	0.864904
1742	600	300	40.9756	0.269015	0.348564	0.149712	0.12	2400000000000000	8300000	0.856835	3.59276	11.2875
1743	600	300	23.7914	0.440696	0.416441	0.297519	0.12	2400000000000000	8300000	0.61675	8.11362	18.3483
1744	600	300	9.45145	0.282063	0.200428	0.279897	0.12	2400000000000000	8300000	0.761214	0.934092	2.60716
1745	600	300	46.8217	0.321827	0.491203	0.214273	0.12	2400000000000000	8300000	0.685391	9.9057	24.894
1746	600	300	66.3221	0.180437	0.221562	0.302735	0.12	2400000000000000	8300000	0.725601	5.01335	13.3382
1747	600	300	2.23801	0.493175	0.365382	0.499063	0.12	2400000000000000	8300000	0.666301	1.25705	3.07111
1748	600	300	71.7362	0.112753	0.110699	0.295505	0.12	2400000000000000	8300000	0.606774	1.65258	3.67672
1749	600	300	63.1611	0.429395	0.46248	0.473533	0.12	2400000000000000	8300000	0.859224	37.0969	116.873
1750	600	300	39.1903	0.226579	0.227024	0.297428	0.12	2400000000000000	8300000	0.695703	3.7449	9.5529
1751	600	300	36.7465	0.145975	0.147808	0.356328	0.12	2400000000000000	8300000	0.69481	1.76453	4.49539
1752	600	300	20.2856	0.274481	0.0895495	0.482809	0.12	2400000000000000	8300000	0.693897	1.50358	3.82554
1753	600	300	18.7075	0.151771	0.205591	0.273138	0.12	2400000000000000	8300000	0.667457	0.995813	2.43709
1754	600	300	64.7138	0.184074	0.137439	0.297358	0.12	2400000000000000	8300000	0.70137	3.04064	7.81958
1755	600	300	45.4804	0.118903	0.392704	0.345043	0.12	2400000000000000	8300000	0.746239	4.5766	12.5225
1756	600	300	14.1553	0.308574	0.275077	0.444549	0.12	2400000000000000	8300000	0.737392	3.3361	9.02005
1757	600	300	34.4772	0.34683	0.100901	0.116123	0.12	2400000000000000	8300000	0.744798	0.875079	2.38977
1758	600	300	46.5696	0.423848	0.305476	0.338957	0.12	2400000000000000	8300000	0.715561	12.765	33.4919
1759	600	300	24.9551	0.102196	0.321255	0.338041	0.12	2400000000000000	8300000	0.674473	1.72982	4.27795
1760	600	300	71.9001	0.144778	0.221496	0.344318	0.12	2400000000000000	8300000	0.828057	4.95845	15.0549
1761	600	300	42.5671	0.349788	0.179279	0.33289	0.12	2400000000000000	8300000	0.828765	5.55004	16.8655
1762	600	300	37.4011	0.396072	0.227217	0.334176	0.12	2400000000000000	8300000	0.695251	7.02526	17.9092
1763	600	300	79.3835	0.299008	0.305439	0.476508	0.12	2400000000000000	8300000	0.792945	21.5772	62.7349
1764	600	300	69.682	0.366489	0.141383	0.182891	0.12	2400000000000000	8300000	0.76535	4.12438	11.5742
1765	600	300	2.32053	0.398811	0.343806	0.393078	0.12	2400000000000000	8300000	0.890323	0.781152	2.55008
1766	600	300	37.8759	0.2166	0.163911	0.287606	0.12	2400000000000000	8300000	0.88383	2.41555	7.82808
1767	600	300	64.0256	0.282813	0.11871	0.408853	0.12	2400000000000000	8300000	0.784864	5.48901	15.7965
1768	600	300	56.9321	0.370581	0.249828	0.310412	0.12	2400000000000000	8300000	0.83299	10.219	31.2118
1769	600	300	9.30997	0.314299	0.0106869	0.282156	0.12	2400000000000000	8300000	0.843702	0.0551087	0.170483
1770	600	300	38.5982	0.101581	0.351028	0.203437	0.12	2400000000000000	8300000	0.759331	1.74879	4.86902
1771	600	300	13.3852	0.494077	0.427974	0.37214	0.12	2400000000000000	8300000	0.869512	6.57854	20.9738
1772	600	300	47.6597	0.303859	0.0233437	0.486707	0.12	2400000000000000	8300000	0.801882	1.02765	3.02154
1773	600	300	35.0709	0.356562	0.124051	0.215106	0.12	2400000000000000	8300000	0.616945	2.08411	4.71453
1774	600	300	2.78583	0.420877	0.133653	0.222428	0.12	2400000000000000	8300000	0.712049	0.217703	0.56839
1775	600	300	30.1133	0.467777	0.118038	0.313179	0.12	2400000000000000	8300000	0.688105	3.25235	8.20585
1776	600	300	70.8359	0.218833	0.403366	0.222816	0.12	2400000000000000	8300000	0.61614	8.70161	19.6585
1777	600	300	63.7217	0.38387	0.252947	0.170681	0.12	2400000000000000	8300000	0.623476	6.59587	15.0787
1778	600	300	52.8897	0.244872	0.404129	0.162301	0.12	2400000000000000	8300000	0.883594	5.30565	17.1895
1779	600	300	48.4617	0.215851	0.168541	0.168736	0.12	2400000000000000	8300000	0.825932	1.85803	5.6269
1780	600	300	20.0932	0.241598	0.023708	0.114134	0.12	2400000000000000	8300000	0.728824	0.0820423	0.219246
1781	600	300	35.8829	0.246696	0.36782	0.450198	0.12	2400000000000000	8300000	0.867514	9.15536	29.1221
1782	600	300	46.9619	0.278034	0.0768245	0.263973	0.12	2400000000000000	8300000	0.715808	1.65382	4.34068
1783	600	300	50.6553	0.31508	0.259551	0.134285	0.12	2400000000000000	8300000	0.606406	3.47442	7.72535
1784	600	300	47.855	0.430716	0.0368881	0.244957	0.12	2400000000000000	8300000	0.693748	1.16327	2.95906
1785	600	300	77.9829	0.324741	0.140031	0.155428	0.12	2400000000000000	8300000	0.719385	3.44253	9.08052
1786	600	300	18.8433	0.289867	0.2981	0.105768	0.12	2400000000000000	8300000	0.752236	1.07562	2.96679
1787	600	300	23.1089	0.374418	0.043051	0.374779	0.12	2400000000000000	8300000	0.876058	0.871928	2.80082
1788	600	300	68.5657	0.219426	0.294031	0.303421	0.12	2400000000000000	8300000	0.878117	8.38338	26.9925
1789	600	300	67.6358	0.441335	0.23021	0.455779	0.12	2400000000000000	8300000	0.755235	19.5618	54.1705
1790	600	300	3.55517	0.489938	0.207283	0.136107	0.12	2400000000000000	8300000	0.798473	0.306924	0.898592
1791	600	300	54.7906	0.214478	0.233815	0.366467	0.12	2400000000000000	8300000	0.692175	6.28903	15.9614
1792	600	300	48.9887	0.2878	0.183872	0.249788	0.12	2400000000000000	8300000	0.613139	4.04447	9.09269
1793	600	300	23.6266	0.210733	0.470845	0.147154	0.12	2400000000000000	8300000	0.654698	2.15463	5.17231
1794	600	300	23.3585	0.493112	0.0392458	0.363475	0.12	2400000000000000	8300000	0.837528	1.02623	3.1515
1795	600	300	26.9251	0.429913	0.0165985	0.138427	0.12	2400000000000000	8300000	0.811661	0.166117	0.494378
1796	600	300	21.2332	0.282662	0.458851	0.141206	0.12	2400000000000000	8300000	0.820076	2.4288	7.30327
1797	600	300	76.8057	0.101908	0.438178	0.104185	0.12	2400000000000000	8300000	0.704831	2.23174	5.76765
1798	600	300	75.2896	0.372675	0.231621	0.169539	0.12	2400000000000000	8300000	0.739612	6.88177	18.6627
1799	600	300	4.89396	0.207526	0.455825	0.104634	0.12	2400000000000000	8300000	0.685322	0.302545	0.76025
1800	600	300	68.0478	0.363185	0.161343	0.467208	0.12	2400000000000000	8300000	0.835158	11.6356	35.6312
1801	600	300	15.8802	0.417708	0.207062	0.236188	0.12	2400000000000000	8300000	0.824535	2.02617	6.1257
1802	600	300	25.5265	0.182034	0.373394	0.186704	0.12	2400000000000000	8300000	0.876548	2.02325	6.50275
1803	600	300	55.7431	0.292232	0.110338	0.160712	0.12	2400000000000000	8300000	0.623863	1.80418	4.12705
1804	600	300	36.2342	0.19364	0.082862	0.431281	0.12	2400000000000000	8300000	0.704859	1.56608	4.04752
1805	600	300	42.139	0.491151	0.166304	0.258612	0.12	2400000000000000	8300000	0.774838	5.55954	15.7951
1806	600	300	71.9798	0.483305	0.173469	0.251641	0.12	2400000000000000	8300000	0.788708	9.48469	27.429
1807	600	300	6.97715	0.313059	0.397129	0.298906	0.12	2400000000000000	8300000	0.838115	1.61941	4.9766
1808	600	300	40.4302	0.463761	0.461515	0.25666	0.12	2400000000000000	8300000	0.853048	13.8717	43.3885
1809	600	300	68.7253	0.302033	0.0223098	0.105136	0.12	2400000000000000	8300000	0.861214	0.304093	0.960262
1810	600	300	79.4415	0.193163	0.283057	0.478831	0.12	2400000000000000	8300000	0.860754	12.9902	40.9982
1811	600	300	26.4111	0.422185	0.35758	0.446362	0.12	2400000000000000	8300000	0.7852	11.1157	32.0029
1812	600	300	59.7057	0.405115	0.0212279	0.417594	0.12	2400000000000000	8300000	0.629692	1.33919	3.09202
1813	600	300	22.3458	0.260966	0.168656	0.139347	0.12	2400000000000000	8300000	0.748578	0.855987	2.3495
1814	600	300	49.9125	0.349157	0.343649	0.327499	0.12	2400000000000000	8300000	0.798903	12.2501	35.8844
1815	600	300	76.023	0.367891	0.418586	0.120264	0.12	2400000000000000	8300000	0.830234	8.79367	26.7696
1816	600	300	40.0834	0.455696	0.231337	0.239049	0.12	2400000000000000	8300000	0.854039	6.30897	19.7564
1817	600	300	79.2046	0.238403	0.0305773	0.195247	0.12	2400000000000000	8300000	0.721785	0.704099	1.86343
1818	600	300	18.6493	0.111705	0.0100157	0.493484	0.12	2400000000000000	8300000	0.708737	0.0643096	0.167121
1819	600	300	55.4327	0.475831	0.455377	0.243947	0.12	2400000000000000	8300000	0.601637	18.3009	40.3718
1820	600	300	25.4703	0.196072	0.421576	0.481301	0.12	2400000000000000	8300000	0.607177	6.32892	14.0902
1821	600	300	72.4581	0.348833	0.0281626	0.11731	0.12	2400000000000000	8300000	0.747265	0.521553	1.42904
1822	600	300	34.0904	0.180499	0.230336	0.271888	0.12	2400000000000000	8300000	0.87574	2.40684	7.72847
1823	600	300	30.8499	0.361568	0.479714	0.153793	0.12	2400000000000000	8300000	0.705038	5.13982	13.2871
1824	600	300	21.7788	0.20338	0.147768	0.213259	0.12	2400000000000000	8300000	0.621429	0.871806	1.98647
1825	600	300	10.2912	0.471155	0.411863	0.175298	0.12	2400000000000000	8300000	0.84181	2.18649	6.74891
1826	600	300	55.4378	0.184354	0.23314	0.448632	0.12	2400000000000000	8300000	0.787121	6.67659	19.2694
1827	600	300	22.4648	0.230953	0.131861	0.224256	0.12	2400000000000000	8300000	0.612595	0.958237	2.15238
1828	600	300	18.9055	0.437704	0.232352	0.116634	0.12	2400000000000000	8300000	0.782712	1.40064	4.01975
1829	600	300	19.7568	0.39231	0.0607491	0.287802	0.12	2400000000000000	8300000	0.801189	0.846382	2.48641
1830	600	300	41.0937	0.409345	0.26671	0.493622	0.12	2400000000000000	8300000	0.644379	13.832	32.6812
1831	600	300	4.23473	0.348426	0.176168	0.474495	0.12	2400000000000000	8300000	0.689305	0.770341	1.947
1832	600	300	38.296	0.266722	0.287316	0.334523	0.12	2400000000000000	8300000	0.789011	6.13175	17.7394
1833	600	300	50.1215	0.441418	0.221457	0.208309	0.12	2400000000000000	8300000	0.747434	6.37466	17.4703
1834	600	300	75.1901	0.256942	0.319319	0.177086	0.12	2400000000000000	8300000	0.737176	6.82327	18.4432
1835	600	300	13.6905	0.394016	0.473103	0.323189	0.12	2400000000000000	8300000	0.887309	5.15148	16.7602
1836	600	300	13.6292	0.38435	0.18157	0.151906	0.12	2400000000000000	8300000	0.758336	0.902408	2.5092
1837	600	300	64.5946	0.443089	0.357388	0.28542	0.12	2400000000000000	8300000	0.82211	18.2347	54.9667
1838	600	300	60.3147	0.220065	0.0971424	0.475025	0.12	2400000000000000	8300000	0.898817	3.82547	12.6075
1839	600	300	42.6635	0.432875	0.0577981	0.176315	0.12	2400000000000000	8300000	0.802745	1.17546	3.45984
1840	600	300	25.8936	0.126603	0.162666	0.412358	0.12	2400000000000000	8300000	0.890868	1.37339	4.4862
1841	600	300	42.197	0.23297	0.446279	0.130474	0.12	2400000000000000	8300000	0.605547	3.57519	7.93813
1842	600	300	53.3971	0.493492	0.266822	0.123939	0.12	2400000000000000	8300000	0.702554	5.44268	14.0205
1843	600	300	29.9747	0.372398	0.457819	0.110819	0.12	2400000000000000	8300000	0.618832	3.5372	8.02609
1844	600	300	73.3282	0.121336	0.486067	0.240893	0.12	2400000000000000	8300000	0.634725	6.50678	15.1434
1845	600	300	11.2625	0.463264	0.0248203	0.159239	0.12	2400000000000000	8300000	0.683396	0.128797	0.322737
1846	600	300	13.7418	0.47803	0.10767	0.17919	0.12	2400000000000000	8300000	0.747772	0.791578	2.17037
1847	600	300	77.6498	0.172283	0.472017	0.231084	0.12	2400000000000000	8300000	0.805094	9.11376	26.9039
1848	600	300	69.2911	0.298287	0.160078	0.281323	0.12	2400000000000000	8300000	0.627996	5.81347	13.3864
1849	600	300	59.7115	0.108425	0.10256	0.314797	0.12	2400000000000000	8300000	0.742447	1.30551	3.554
1850	600	300	68.2058	0.455427	0.450464	0.383329	0.12	2400000000000000	8300000	0.606714	33.5011	74.5272
1851	600	300	62.7793	0.227708	0.156462	0.278639	0.12	2400000000000000	8300000	0.651285	3.89251	9.2955
1852	600	300	29.7984	0.481438	0.187191	0.100088	0.12	2400000000000000	8300000	0.819979	1.67876	5.04735
1853	600	300	39.6258	0.336578	0.469288	0.420148	0.12	2400000000000000	8300000	0.861906	16.4245	51.9067
1854	600	300	13.4202	0.305443	0.101079	0.464618	0.12	2400000000000000	8300000	0.897654	1.20235	3.95742
1855	600	300	47.302	0.349921	0.118512	0.486328	0.12	2400000000000000	8300000	0.802464	5.95839	17.5318
1856	600	300	3.08935	0.354403	0.24892	0.437419	0.12	2400000000000000	8300000	0.809551	0.744577	2.21017
1857	600	300	25.6482	0.41145	0.328264	0.445121	0.12	2400000000000000	8300000	0.601528	9.63079	21.2417
1858	600	300	59.5712	0.434082	0.0456048	0.120271	0.12	2400000000000000	8300000	0.822554	0.885862	2.67179
1859	600	300	3.20162	0.337166	0.168938	0.283043	0.12	2400000000000000	8300000	0.69991	0.322388	0.827357
1860	600	300	41.2544	0.196541	0.196333	0.264251	0.12	2400000000000000	8300000	0.81653	2.62736	7.86616
1861	600	300	7.79737	0.249101	0.0502715	0.454156	0.12	2400000000000000	8300000	0.627525	0.276973	0.637294
1862	600	300	59.5398	0.208976	0.0741435	0.298056	0.12	2400000000000000	8300000	0.670757	1.71737	4.22376
1863	600	300	8.91134	0.15055	0.489512	0.476453	0.12	2400000000000000	8300000	0.818673	1.95431	5.86644
1864	600	300	33.3649	0.221109	0.184318	0.371306	0.12	2400000000000000	8300000	0.645921	3.15343	7.46852
1865	600	300	15.6592	0.180509	0.250989	0.199321	0.12	2400000000000000	8300000	0.828609	0.88321	2.6834
1866	600	300	32.6016	0.259892	0.384665	0.460628	0.12	2400000000000000	8300000	0.828483	9.37671	28.4843
1867	600	300	54.8849	0.277172	0.0329297	0.372347	0.12	2400000000000000	8300000	0.861162	1.16499	3.67857
1868	600	300	16.9091	0.475876	0.0408671	0.287009	0.12	2400000000000000	8300000	0.825608	0.589481	1.7845
1869	600	300	73.1777	0.438579	0.236581	0.139996	0.12	2400000000000000	8300000	0.627428	6.63909	15.2737
1870	600	300	21.4656	0.227066	0.21846	0.42898	0.12	2400000000000000	8300000	0.896596	2.85293	9.37907
1871	600	300	67.7965	0.466926	0.416304	0.474729	0.12	2400000000000000	8300000	0.801574	39.075	114.845
1872	600	300	25.0885	0.353676	0.0959336	0.457417	0.12	2400000000000000	8300000	0.863483	2.43192	7.69972
1873	600	300	45.0903	0.164194	0.261673	0.288408	0.12	2400000000000000	8300000	0.690586	3.48974	8.83654
1874	600	300	66.7946	0.410736	0.410702	0.373431	0.12	2400000000000000	8300000	0.651414	26.2802	62.7707
1875	600	300	12.8723	0.25732	0.116271	0.419135	0.12	2400000000000000	8300000	0.72777	1.00818	2.69032
1876	600	300	72.6573	0.300946	0.299087	0.333944	0.12	2400000000000000	8300000	0.863664	13.6404	43.1959
1877	600	300	70.773	0.364737	0.209396	0.141627	0.12	2400000000000000	8300000	0.802132	4.78135	14.0627
1878	600	300	30.3107	0.216345	0.181253	0.246473	0.12	2400000000000000	8300000	0.743561	1.82972	4.98853
1879	600	300	18.0881	0.152104	0.350943	0.462422	0.12	2400000000000000	8300000	0.705359	2.78867	7.21237
1880	600	300	51.2183	0.191817	0.311274	0.216375	0.12	2400000000000000	8300000	0.60472	4.13285	9.1638
1881	600	300	2.15592	0.176111	0.301924	0.237786	0.12	2400000000000000	8300000	0.707977	0.170251	0.441957
1882	600	300	10.0718	0.171014	0.479387	0.298276	0.12	2400000000000000	8300000	0.782198	1.53827	4.41184
1883	600	300	28.8905	0.277413	0.367308	0.356897	0.12	2400000000000000	8300000	0.688267	6.56206	16.5603
1884	600	300	29.8642	0.120409	0.0630338	0.212111	0.12	2400000000000000	8300000	0.680655	0.300285	0.749431
1885	600	300	52.7798	0.452735	0.21923	0.289084	0.12	2400000000000000	8300000	0.634254	9.45851	21.9967
1886	600	300	60.6134	0.308465	0.142773	0.110161	0.12	2400000000000000	8300000	0.643911	1.83668	4.33641
1887	600	300	66.2244	0.399686	0.130233	0.182838	0.12	2400000000000000	8300000	0.841713	3.93652	12.1492
1888	600	300	61.7455	0.321922	0.23854	0.359869	0.12	2400000000000000	8300000	0.668894	10.6573	26.1383
1889	600	300	71.0973	0.322586	0.321452	0.159025	0.12	2400000000000000	8300000	0.702421	7.32265	18.8598
1890	600	300	1.03581	0.472116	0.323875	0.373027	0.12	2400000000000000	8300000	0.812522	0.369005	1.09936
1891	600	300	26.1925	0.163014	0.265998	0.42557	0.12	2400000000000000	8300000	0.650071	3.01883	7.19566
1892	600	300	64.6687	0.151725	0.140531	0.118165	0.12	2400000000000000	8300000	0.741998	1.01765	2.76868
1893	600	300	53.4534	0.383041	0.147378	0.388495	0.12	2400000000000000	8300000	0.709058	7.32193	19.0361
1894	600	300	20.6149	0.330591	0.265177	0.445154	0.12	2400000000000000	8300000	0.855591	5.02466	15.7632
1895	600	300	54.4959	0.272356	0.0048437	0.334961	0.12	2400000000000000	8300000	0.629724	0.150404	0.34728
1896	600	300	40.0849	0.46939	0.253948	0.339762	0.12	2400000000000000	8300000	0.823925	10.1396	30.6323
1897	600	300	75.696	0.126636	0.353561	0.474784	0.12	2400000000000000	8300000	0.745403	10.0503	27.4688
1898	600	300	25.6803	0.465793	0.0394868	0.427486	0.12	2400000000000000	8300000	0.653679	1.26111	3.02266
1899	600	300	11.9893	0.176175	0.113026	0.454441	0.12	2400000000000000	8300000	0.802175	0.677609	1.99306
1900	600	300	42.8657	0.42584	0.211311	0.172481	0.12	2400000000000000	8300000	0.638149	4.15533	9.72297
1901	600	300	53.6037	0.370275	0.0471508	0.380089	0.12	2400000000000000	8300000	0.698108	2.22168	5.6869
1902	600	300	26.5939	0.493003	0.453268	0.199392	0.12	2400000000000000	8300000	0.741489	7.40084	20.1214
1903	600	300	71.2756	0.228073	0.0223812	0.197322	0.12	2400000000000000	8300000	0.719258	0.448396	1.18255
1904	600	300	7.36853	0.196956	0.00601023	0.121039	0.12	2400000000000000	8300000	0.82328	0.00659407	0.0199055
1905	600	300	70.8182	0.354245	0.0141074	0.245088	0.12	2400000000000000	8300000	0.698091	0.541759	1.38672
1906	600	300	63.1925	0.100174	0.0741673	0.149581	0.12	2400000000000000	8300000	0.814782	0.438629	1.31042
1907	600	300	51.657	0.162654	0.0614365	0.385823	0.12	2400000000000000	8300000	0.783553	1.24392	3.57383
1908	600	300	37.2498	0.415889	0.319248	0.401863	0.12	2400000000000000	8300000	0.808147	12.4135	36.7839
1909	600	300	60.5037	0.231076	0.189638	0.489992	0.12	2400000000000000	8300000	0.853954	8.11407	25.4065
1910	600	300	41.0057	0.163749	0.160192	0.255843	0.12	2400000000000000	8300000	0.805773	1.7188	5.07819
1911	600	300	8.70411	0.412643	0.440871	0.370453	0.12	2400000000000000	8300000	0.847241	3.66379	11.3818
1912	600	300	19.3384	0.452008	0.36909	0.330432	0.12	2400000000000000	8300000	0.765018	6.65835	18.6771
1913	600	300	73.6754	0.350104	0.396163	0.114492	0.12	2400000000000000	8300000	0.600984	7.30728	16.1024
1914	600	300	7.52599	0.454916	0.442019	0.177308	0.12	2400000000000000	8300000	0.676718	1.67592	4.15845
1915	600	300	15.3297	0.340558	0.0532471	0.197721	0.12	2400000000000000	8300000	0.731412	0.343289	0.920647
1916	600	300	8.75516	0.141893	0.311708	0.37998	0.12	2400000000000000	8300000	0.733635	0.919011	2.47214
1917	600	300	21.5599	0.19752	0.0849749	0.275839	0.12	2400000000000000	8300000	0.856891	0.623435	1.95879
1918	600	300	79.7998	0.237257	0.135329	0.418808	0.12	2400000000000000	8300000	0.811611	6.70214	19.9449
1919	600	300	29.3113	0.353304	0.421678	0.250797	0.12	2400000000000000	8300000	0.847913	6.84027	21.2665
1920	600	300	34.6975	0.340869	0.261651	0.470524	0.12	2400000000000000	8300000	0.842355	9.09447	28.0895
1921	600	300	68.115	0.21589	0.198347	0.238803	0.12	2400000000000000	8300000	0.625707	4.35039	9.98092
1922	600	300	75.204	0.388574	0.0651216	0.148405	0.12	2400000000000000	8300000	0.625	1.7639	4.04227
1923	600	300	22.4865	0.117448	0.283914	0.169814	0.12	2400000000000000	8300000	0.62454	0.795267	1.82115
1924	600	300	79.4003	0.469886	0.193923	0.14496	0.12	2400000000000000	8300000	0.68184	6.55057	16.377
1925	600	300	71.3567	0.405517	0.147985	0.378415	0.12	2400000000000000	8300000	0.61027	10.1209	22.647
1926	600	300	75.2771	0.340582	0.356904	0.404914	0.12	2400000000000000	8300000	0.723978	23.1411	61.4301
1927	600	300	68.9121	0.293771	0.250139	0.493844	0.12	2400000000000000	8300000	0.760166	15.6193	43.5353
1928	600	300	12.7532	0.271358	0.378793	0.170811	0.12	2400000000000000	8300000	0.758133	1.39851	3.88761
1929	600	300	68.8877	0.35343	0.177265	0.157639	0.12	2400000000000000	8300000	0.654501	4.24931	10.1977
1930	600	300	23.8107	0.187643	0.190696	0.108002	0.12	2400000000000000	8300000	0.6046	0.574731	1.2741
1931	600	300	21.8468	0.435739	0.445295	0.125069	0.12	2400000000000000	8300000	0.667191	3.3113	8.10066
1932	600	300	27.8215	0.325383	0.455553	0.125246	0.12	2400000000000000	8300000	0.8766	3.226	10.369
1933	600	300	77.5538	0.150745	0.440629	0.4845	0.12	2400000000000000	8300000	0.610566	15.5883	34.8983
1934	600	300	25.9885	0.495829	0.148319	0.282619	0.12	2400000000000000	8300000	0.696504	3.37364	8.61576
1935	600	300	52.7871	0.446351	0.47656	0.134912	0.12	2400000000000000	8300000	0.724354	9.46145	25.1293
1936	600	300	1.10913	0.469766	0.275216	0.330412	0.12	2400000000000000	8300000	0.822441	0.295923	0.892392
1937	600	300	18.7383	0.344674	0.107832	0.161621	0.12	2400000000000000	8300000	0.836734	0.703023	2.15689
1938	600	300	56.0684	0.46809	0.42073	0.352164	0.12	2400000000000000	8300000	0.645912	24.2875	57.5212
1939	600	300	79.1015	0.37788	0.0776335	0.130422	0.12	2400000000000000	8300000	0.775072	1.89028	5.37203
1940	600	300	19.9109	0.298244	0.291755	0.482965	0.12	2400000000000000	8300000	0.731242	5.22617	14.0125
1941	600	300	26.3456	0.123519	0.289271	0.371125	0.12	2400000000000000	8300000	0.746003	2.18199	5.9685
1942	600	300	60.5155	0.157826	0.437227	0.14745	0.12	2400000000000000	8300000	0.829103	3.84577	11.6913
1943	600	300	61.3592	0.114189	0.0876637	0.479828	0.12	2400000000000000	8300000	0.772644	1.84075	5.21491
1944	600	300	4.29871	0.385617	0.217374	0.162958	0.12	2400000000000000	8300000	0.878241	0.366744	1.181
1945	600	300	15.3474	0.304951	0.357349	0.490386	0.12	2400000000000000	8300000	0.885962	5.12251	16.6406
1946	600	300	3.40863	0.171102	0.21484	0.426689	0.12	2400000000000000	8300000	0.787837	0.333923	0.964616
1947	600	300	77.6046	0.438542	0.122195	0.498995	0.12	2400000000000000	8300000	0.855013	12.9609	40.6331
1948	600	300	37.1906	0.298524	0.0895506	0.43759	0.12	2400000000000000	8300000	0.819126	2.71729	8.16127
1949	600	300	23.2239	0.360816	0.38434	0.110729	0.12	2400000000000000	8300000	0.755725	2.22733	6.17191
1950	600	300	22.7017	0.453642	0.313383	0.205246	0.12	2400000000000000	8300000	0.713828	4.13721	10.8286
1951	600	300	19.3036	0.334922	0.336182	0.351233	0.12	2400000000000000	8300000	0.694122	4.76803	12.1352
1952	600	300	35.7524	0.321429	0.345575	0.342788	0.12	2400000000000000	8300000	0.778301	8.50247	24.2641
1953	600	300	78.2704	0.458356	0.291969	0.137347	0.12	2400000000000000	8300000	0.803218	8.98555	26.4636
1954	600	300	51.4372	0.406558	0.0646599	0.252892	0.12	2400000000000000	8300000	0.890802	2.13578	6.97605
1955	600	300	21.8958	0.261141	0.395149	0.149758	0.12	2400000000000000	8300000	0.632411	2.11336	4.90055
1956	600	300	38.8238	0.290015	0.0165938	0.207024	0.12	2400000000000000	8300000	0.619733	0.241587	0.548971
1957	600	300	12.6685	0.43969	0.0696987	0.196084	0.12	2400000000000000	8300000	0.703604	0.47547	1.22666
1958	600	300	56.7902	0.254566	0.418008	0.137515	0.12	2400000000000000	8300000	0.881687	5.19031	16.7795
1959	600	300	74.092	0.308504	0.349134	0.360331	0.12	2400000000000000	8300000	0.819906	17.9602	53.9942
1960	600	300	69.2204	0.179838	0.177603	0.349891	0.12	2400000000000000	8300000	0.834739	4.83154	14.7879
1961	600	300	25.5123	0.10533	0.302236	0.219583	0.12	2400000000000000	8300000	0.645869	1.11387	2.63785
1962	600	300	5.63806	0.297294	0.0881929	0.41261	0.12	2400000000000000	8300000	0.733673	0.380957	1.02483
1963	600	300	73.698	0.495831	0.0330961	0.348743	0.12	2400000000000000	8300000	0.607587	2.63426	5.86865
1964	600	300	12.5008	0.230305	0.206334	0.406952	0.12	2400000000000000	8300000	0.695737	1.50988	3.85177
1965	600	300	7.5832	0.329352	0.461836	0.442558	0.12	2400000000000000	8300000	0.604187	3.18828	7.06318
1966	600	300	10.8399	0.355937	0.329173	0.15487	0.12	2400000000000000	8300000	0.758125	1.2285	3.41497
1967	600	300	15.9937	0.357129	0.149911	0.184345	0.12	2400000000000000	8300000	0.642828	0.985883	2.32376
1968	600	300	75.1043	0.202004	0.214907	0.206448	0.12	2400000000000000	8300000	0.68961	4.20409	10.6303
1969	600	300	9.36014	0.187906	0.153847	0.112812	0.12	2400000000000000	8300000	0.861877	0.190658	0.60252
1970	600	300	39.1855	0.23284	0.262797	0.368367	0.12	2400000000000000	8300000	0.853035	5.51658	17.2547
1971	600	300	27.8148	0.45129	0.238535	0.342989	0.12	2400000000000000	8300000	0.601621	6.41432	14.1496
1972	600	300	37.8114	0.45528	0.290035	0.325817	0.12	2400000000000000	8300000	0.877188	10.1604	32.6796
1973	600	300	16.602	0.264099	0.428214	0.360276	0.12	2400000000000000	8300000	0.761208	4.22483	11.7919
1974	600	300	34.286	0.2796	0.102537	0.296623	0.12	2400000000000000	8300000	0.60362	1.82106	4.03051
1975	600	300	38.2864	0.410355	0.414247	0.168713	0.12	2400000000000000	8300000	0.660229	6.85804	16.6022
1976	600	300	54.2785	0.272531	0.257977	0.312544	0.12	2400000000000000	8300000	0.839041	7.44941	22.918
1977	600	300	16.1598	0.364579	0.114736	0.232857	0.12	2400000000000000	8300000	0.613334	0.983118	2.21093
1978	600	300	17.6345	0.369968	0.198944	0.33912	0.12	2400000000000000	8300000	0.74652	2.74915	7.52508
1979	600	300	33.9502	0.341982	0.227722	0.369475	0.12	2400000000000000	8300000	0.821265	6.1013	18.3729
1980	600	300	39.6476	0.258239	0.154038	0.228697	0.12	2400000000000000	8300000	0.700913	2.25275	5.78961
1981	600	300	70.7343	0.48859	0.263462	0.125926	0.12	2400000000000000	8300000	0.633892	7.16137	16.645
1982	600	300	57.4673	0.228144	0.186208	0.15776	0.12	2400000000000000	8300000	0.698918	2.40554	6.16469
1983	600	300	55.1717	0.297677	0.031384	0.234023	0.12	2400000000000000	8300000	0.625606	0.75338	1.72817
1984	600	300	27.7114	0.287722	0.0269713	0.131219	0.12	2400000000000000	8300000	0.869714	0.176245	0.562037
1985	600	300	39.1691	0.220839	0.111754	0.404203	0.12	2400000000000000	8300000	0.656997	2.44045	5.87902
1986	600	300	44.4751	0.119848	0.285165	0.437128	0.12	2400000000000000	8300000	0.734385	4.14994	11.1747
1987	600	300	74.9949	0.347088	0.478965	0.425013	0.12	2400000000000000	8300000	0.880468	33.0951	106.844
1988	600	300	33.6673	0.236305	0.266878	0.406754	0.12	2400000000000000	8300000	0.743379	5.39403	14.7026
1989	600	300	23.491	0.374142	0.0424548	0.313289	0.12	2400000000000000	8300000	0.718442	0.730127	1.92336
1990	600	300	13.4922	0.38653	0.422844	0.245245	0.12	2400000000000000	8300000	0.694233	3.37779	8.59823
1991	600	300	28.4153	0.32603	0.383573	0.359328	0.12	2400000000000000	8300000	0.81451	7.9751	23.8179
1992	600	300	9.27226	0.321559	0.235325	0.392127	0.12	2400000000000000	8300000	0.632142	1.71842	3.98304
1993	600	300	49.7836	0.495225	0.114094	0.268007	0.12	2400000000000000	8300000	0.838658	4.70854	14.4791
1994	600	300	49.7539	0.158684	0.15136	0.314058	0.12	2400000000000000	8300000	0.626251	2.34407	5.38258
1995	600	300	32.0139	0.316093	0.138858	0.333626	0.12	2400000000000000	8300000	0.746559	2.928	8.01505
1996	600	300	23.666	0.193104	0.131117	0.209631	0.12	2400000000000000	8300000	0.644223	0.784544	1.85321
1997	600	300	36.7335	0.367729	0.0229791	0.32765	0.12	2400000000000000	8300000	0.626464	0.635214	1.45911
1998	600	300	61.7773	0.344558	0.350502	0.436887	0.12	2400000000000000	8300000	0.828043	20.3581	61.8104
[truncated: 3,002 more rows]
